# Supplementary material
Source: PubMed Central journal article supplement (PMC3074941)

BN-2-15-2  
CDCl3  
H1 NMR

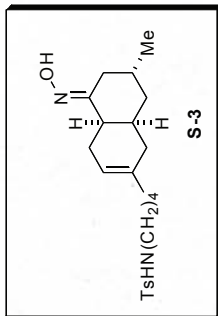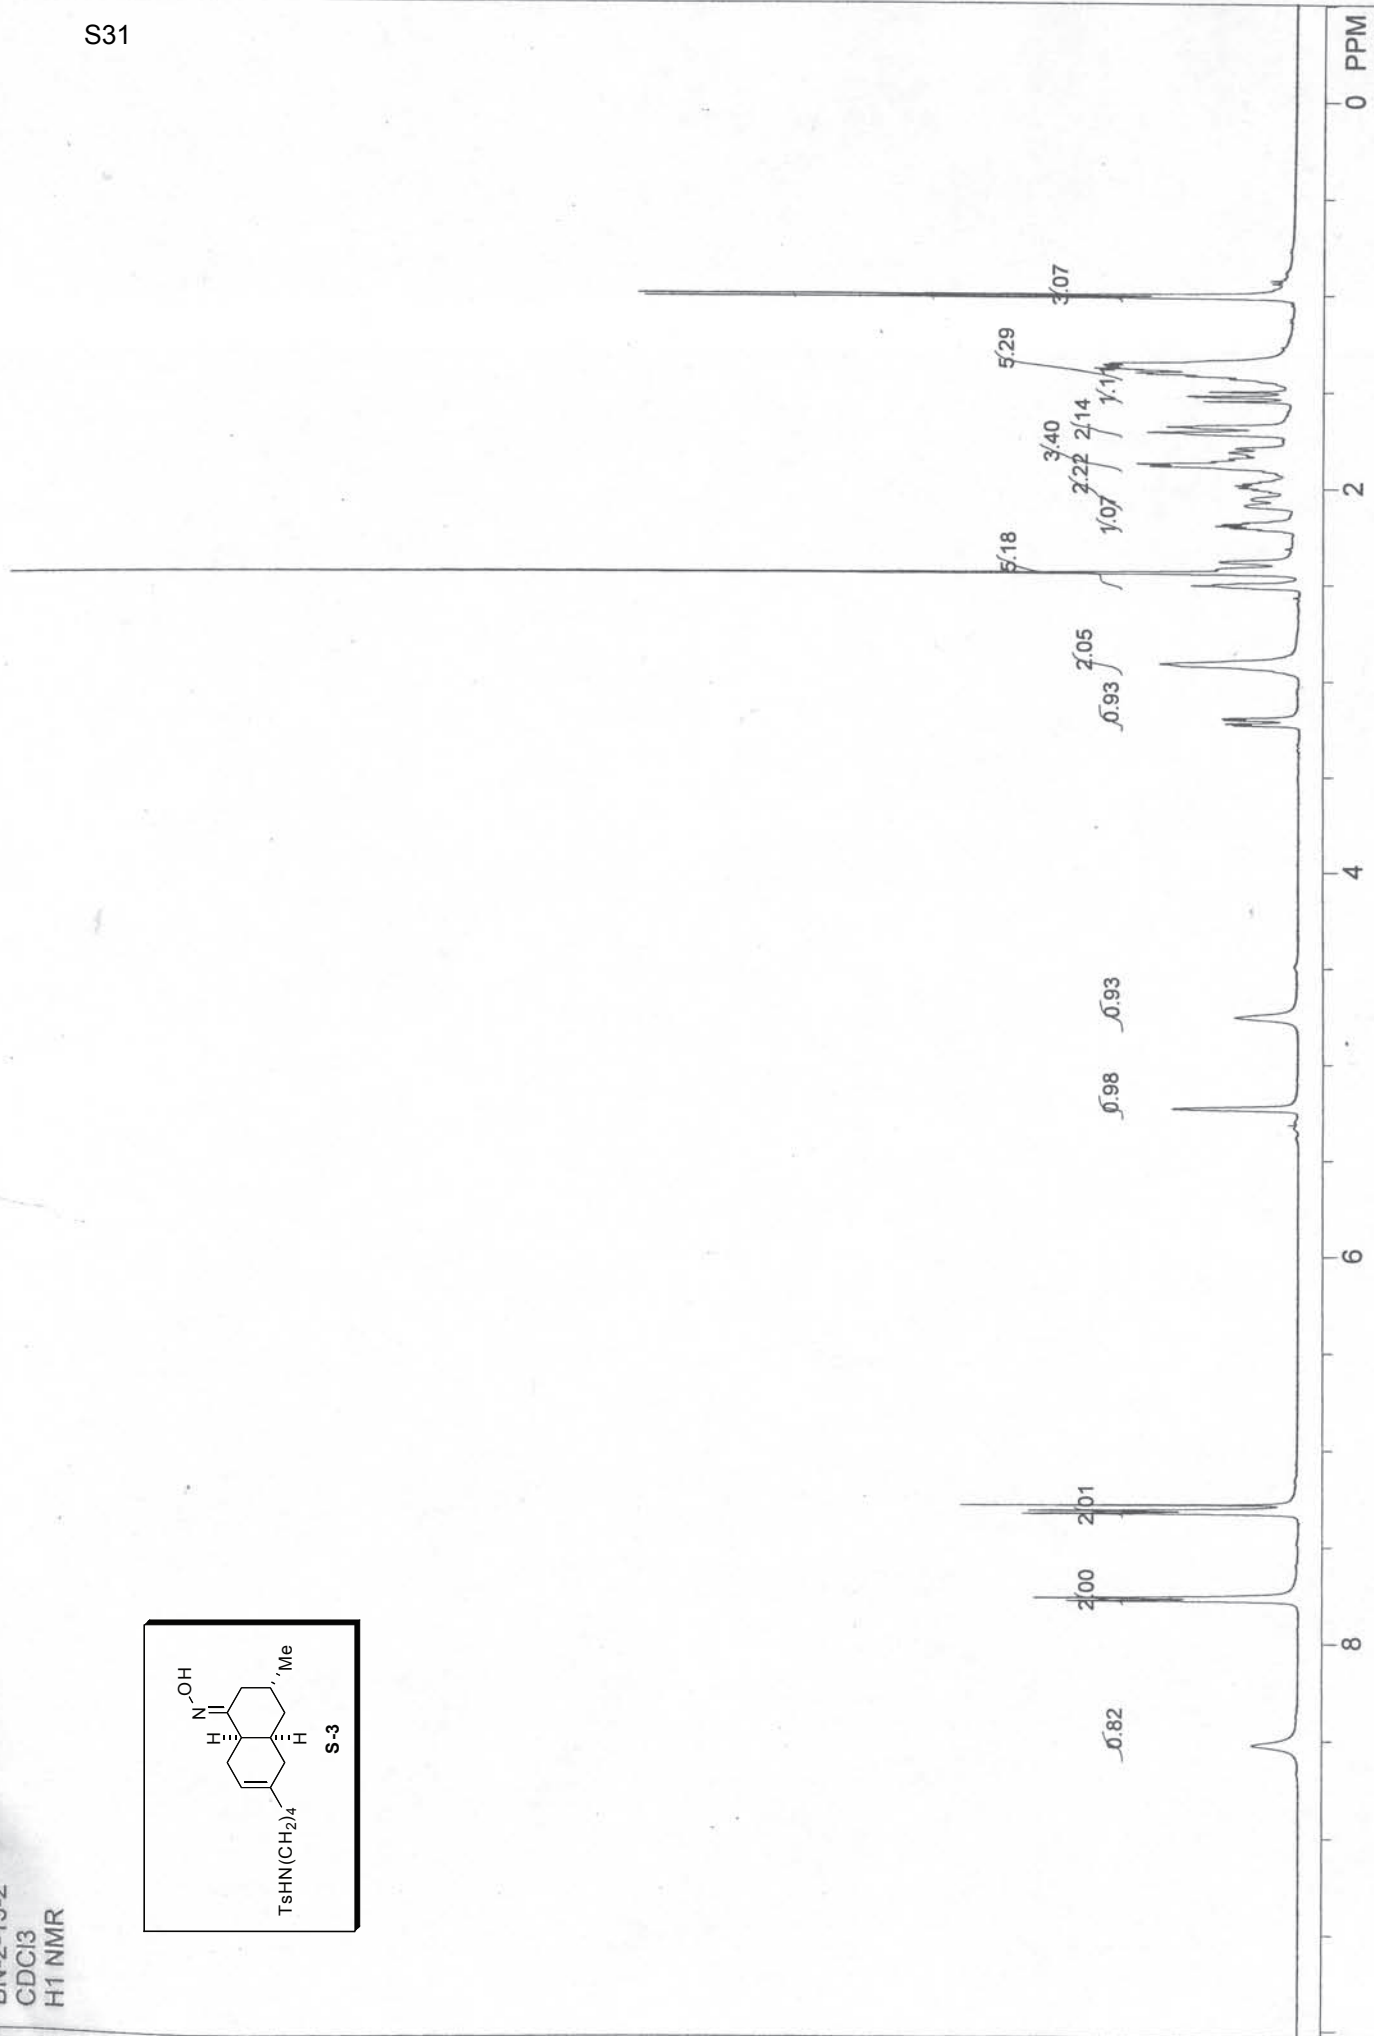

|             |               |             |             |                                               |
|-------------|---------------|-------------|-------------|-----------------------------------------------|
| F1: 499.934 | F2: 1.000     | SW1: 8013   | OF1: 3479.2 | USER: guest -- DATE: Fri Apr 28 17:22:38 2006 |
| EX:         | PW: 11.5 usec | PD: 0.1 sec | NA: 8       | PTS1d: 65536                                  |
|             |               |             | LB: 0.1     | WinNuts - \$BN-3-15-2.1                       |

S32

42.908  
39.644  
38.421  
36.948  
34.522  
31.999  
30.068  
28.917  
28.634  
25.801  
23.833  
22.274  
21.730

77.483  
77.000  
76.977

160.153  
143.401  
137.355  
135.377  
129.819  
127.318  
119.151

0 PPM  
50  
100  
150  
200

BN-3-15-2  
CDCI3  
C13 NMR

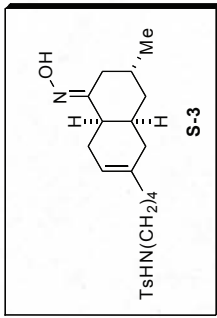

USER: nmrprd -- DATE: Sat Apr 29 15:11:18 2006

PTSIId: 65536

OF1: 13849.5

SW1: 30303

F2: 1.000

F1: 125.721

WinNuts - \$BN-3-15-2.1

LB: 2.0

NA: 273

PD: 0.3 sec

PW: 7.0 usec

EX:

0.90695  
0.93231  
0.98966  
1.00366  
1.18185  
1.20762  
1.26314  
1.37791  
1.39610  
1.40095  
1.42013  
1.47338  
1.50796  
1.62635  
1.62666  
1.66087  
1.68878  
1.72962  
1.77750  
1.88458  
1.92316  
1.97305  
1.98705  
2.08144  
2.11552  
2.37445  
2.49970  
2.69482  
3.33697  
3.49390  
3.71088  
5.21801  
6.89281  
7.36673  
7.38222  
7.44865  
7.45844  
7.64742  
7.66305

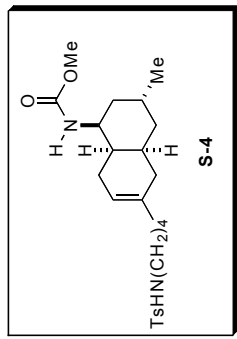

Current Data Parameters  
 USER jgreed  
 NAME xr-2-287-new  
 EXPNO 7  
 PROCNO 1

F2 - Acquisition Parameters  
 Date\_ 20080616  
 Time 17:31  
 NS000H 17.31  
 PULPROG zgpg300  
 PRGNAME 5 mm CPDCL13  
 FIDRES 0.098043 Hz  
 AQ 5.0999398 sec  
 RG 71.8  
 DW 62.400 usec  
 DE 6.00 usec  
 TE 298.1 K  
 MCFRESF 0.1000000 sec  
 MCHNK 0.0150000 sec

==== CHANNEL f1 =====  
 NUCL 1H  
 P1 7.38 usec  
 PL1 1.60 dB  
 SFO1 500.2235015 MHz

F2 - Processing parameters  
 SI 65536  
 SF 500.220122 MHz  
 WDW EM  
 SS 0  
 GB 0  
 PC 4.00

1D NMR plot parameters  
 CX 22.80 cm  
 CY 15.00 cm  
 FIP 10.000 ppm  
 F1 5002.20 Hz  
 F2 -1.000 ppm  
 FZ -500.22 Hz  
 PRCH 0.48246 ppm/cm  
 HZCH 241.33421 Hz/cm

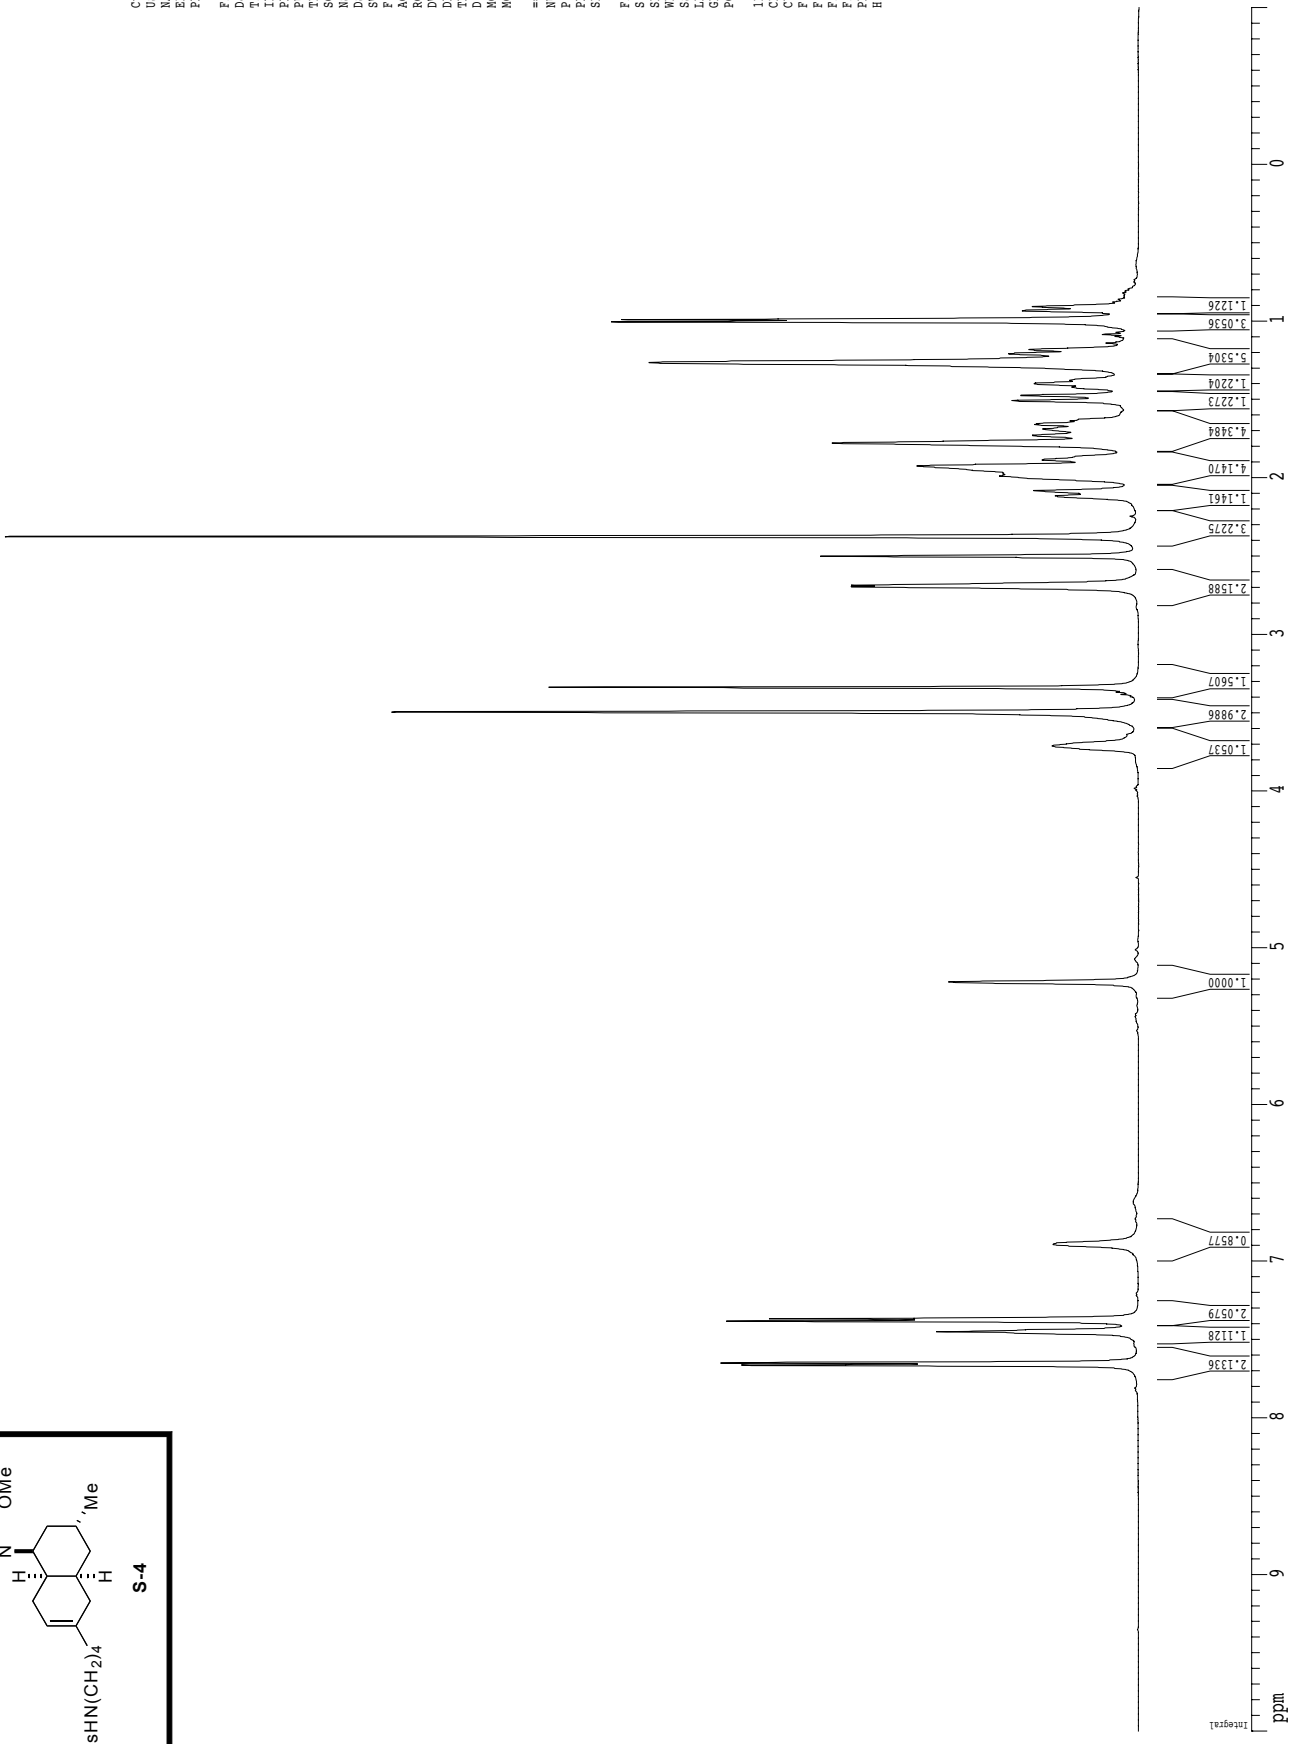

<sup>13</sup>C spectrum with <sup>1</sup>H decoupling

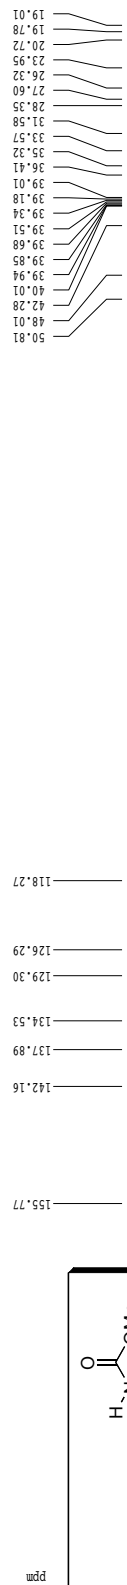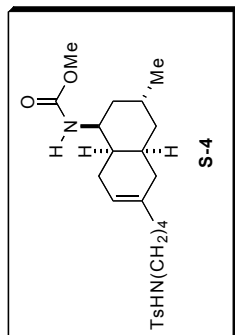

Spectrum obtained at 323 °K

```

Current Data Parameters
USER          jgread
NAME         xt-2-287-new
EXPNO        5
PROCNO       1

F2 - Acquisition Parameters
Date_        20080616
Time         17.22
INSTRUM      cryo500
PROBHD       5 mm CPCL1 H-
PULPROG      zgpg30
AQ           6.543
SOLVENT      CDCl3
NS           172
DS           4
SPH          30303.031 Hz
FIDRES       0.463222 Hz
AQ           1.0794635 sec
RG           6502
DW           16.500 usec
DE           6.00 usec
TE           323.0 K
D1           0.25000000 sec
d11          0.03000000 sec
MCREST       0.00000000 sec
MCPRK        0.01500000 sec

===== CHANNEL f1 =====
NUC1          13C
P1           14.75 usec
PL1          -1.00 dB
SFO1         125.7942548 MHz

===== CHANNEL f2 =====
CPDPRG2      walz316
NUC2          1H
PCPD2        100.00 usec
PL2          1.60 dB
PL12         24.80 dB
SFO2         500.2225011 MHz

F2 - Processing parameters
SI           65536
SF           125.7805022 MHz
WDW          EM
SSB          0
LB           1.00 Hz
GB           0
PC           2.00

ID NMR plot parameters
CX           22.80 cm
CY           15.65 cm
F1P          200.000 ppm
F2P          25156.10 Hz
F2P          0.000 ppm
F2           0.00 Hz
PFMCH        8.77193 ppm/cm
HZCH         1103.33777 Hz/cm
    
```

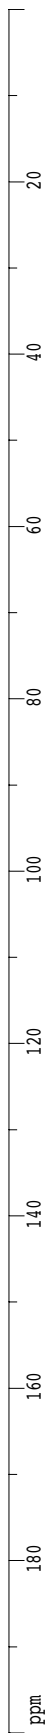



XR-1-171-2D  
proton  
1H spectrum

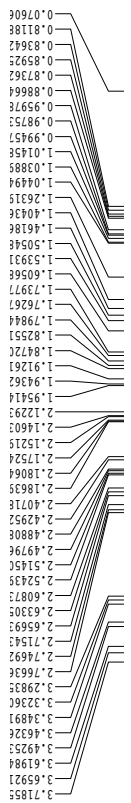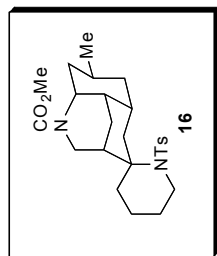

```

Current Data Parameters
USER          jread
NAME         XR-1-171-2D
EXPNO        1
PROCNO       1

F2 - Acquisition Parameters
Date_        20061119
Time         15.06
INSTRUM      crys500
PROBHD       5 mm CPCTCI IH-
PULPROG      zg30
TD           81728
SOLVENT      CDCl3
NS           8
DS           2
SWH          8012.820 Hz
FIDRES      0.098043 Hz
AQ          5.0998774 sec
RG           63
DR           62.00 usec
DE           288.0 K
TE           0.10000000 sec
D1           0.00000000 sec
MCREST      0.00000000 sec
MCWRK       0.01500000 sec

===== CHANNEL f1 =====
NUC1         1H
P1           8.00 usec
PL1          1.60 dB
SFO1         500.2235015 MHz

F2 - Processing parameters
SI           32768
SF           500.220263 MHz
WDW          EM
SSB          0
LB           0.30 Hz
GB           0
PC           4.00

1D NMR plot parameters
CX          22.80 cm
CY          15.00 cm
F1          10.000 ppm
F2          500.220 Hz
F3          -500.32 ppm
PRCMO      0.48246 ppm/cm
HZCM       241.33423 Hz/cm
    
```

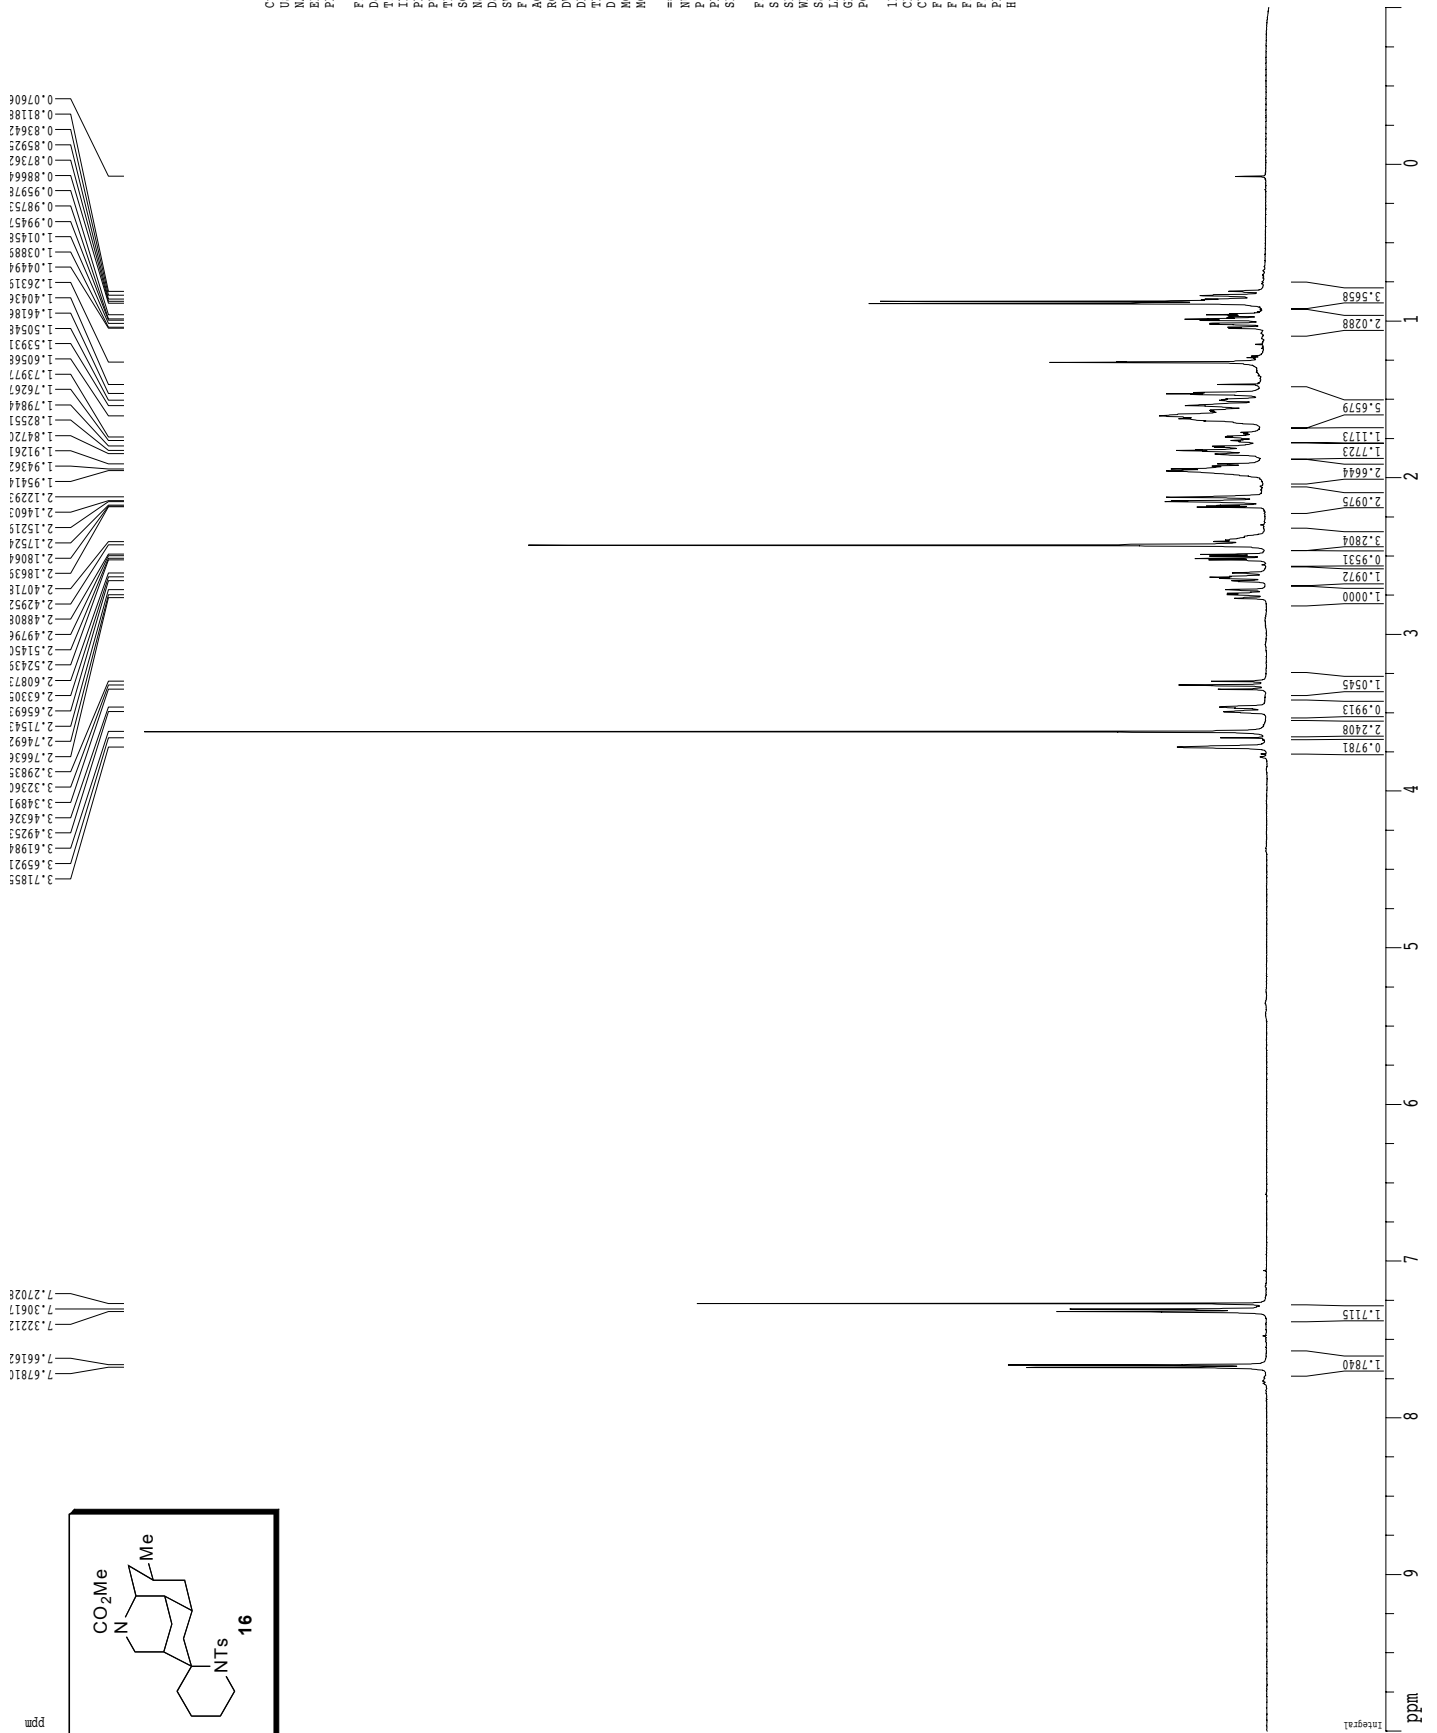

## 13C spectrum with 1H decoupling

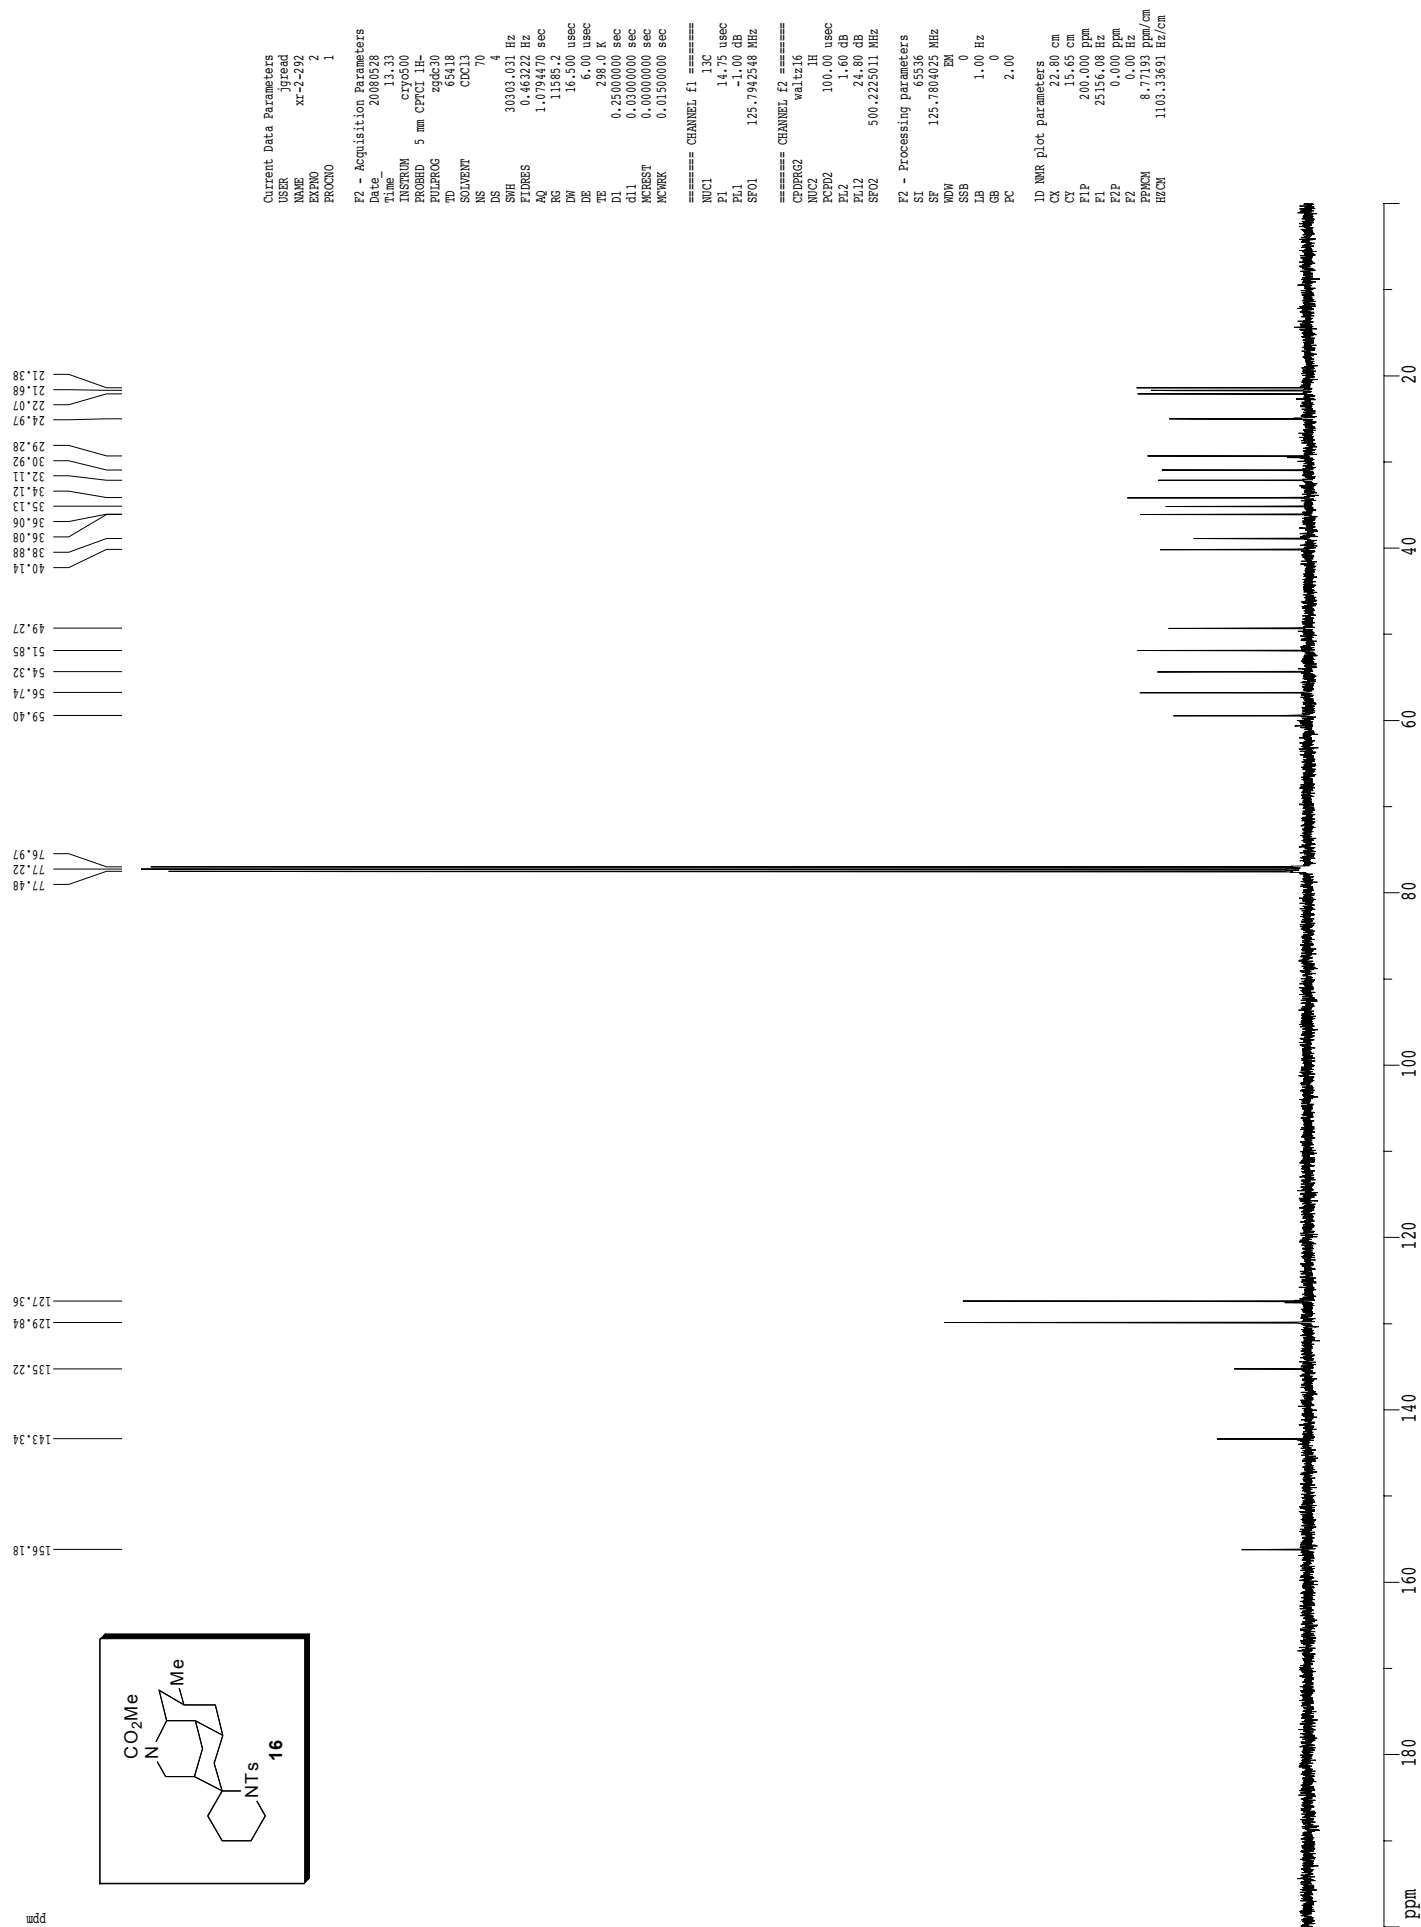

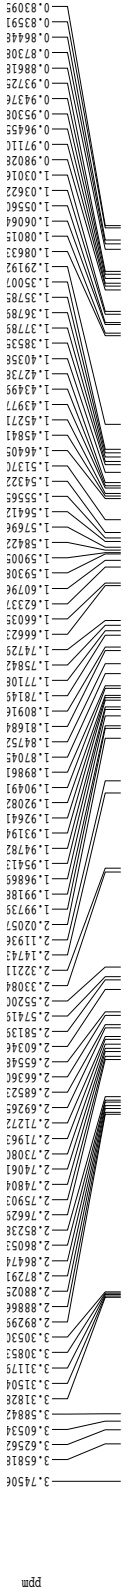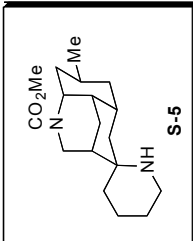

Free Base

Current Data Parameters  
 USER jgread  
 NAME XT-293-MeOD-1  
 EXPNO 1  
 PROCNO 1

F2 - Acquisition Parameters  
 Date\_ 20080604  
 Time 8:03  
 MSNAME 91360  
 PROBHD 5 mm broadband  
 PULPROG zgpg30  
 TD 81728  
 SOLVENT CDCl<sub>3</sub>T  
 NS 8  
 DS 2  
 SWH 8012.820 Hz  
 FIDRES 0.098043 Hz  
 AQ 5.0998774 sec  
 RG 181  
 DW 62.400 usec  
 DE 6.00 usec  
 TE 298.0 K  
 MCFRESF 0.0000000 sec  
 MCHNK 0.01500000 sec

==== CHANNEL f1 =====  
 NUCL 1H  
 P1 12.00 usec  
 PL1 -3.00 dB  
 SFO1 499.8284988 MHz

F2 - Processing parameters  
 SI 65536  
 SF 499.8250175 MHz  
 WDW EM  
 SS 0  
 LB 0.30 Hz  
 GB 0  
 PC 4.00

1D NMR plot parameters  
 CX 22.80 cm  
 CY 15.00 cm  
 FIP 4.000 ppm  
 F1 1999.30 Hz  
 F2P 0.000 ppm  
 F2 0.00 Hz  
 PRCH 0.17544 ppm/cm  
 HZCX 87.68660 Hz/cm

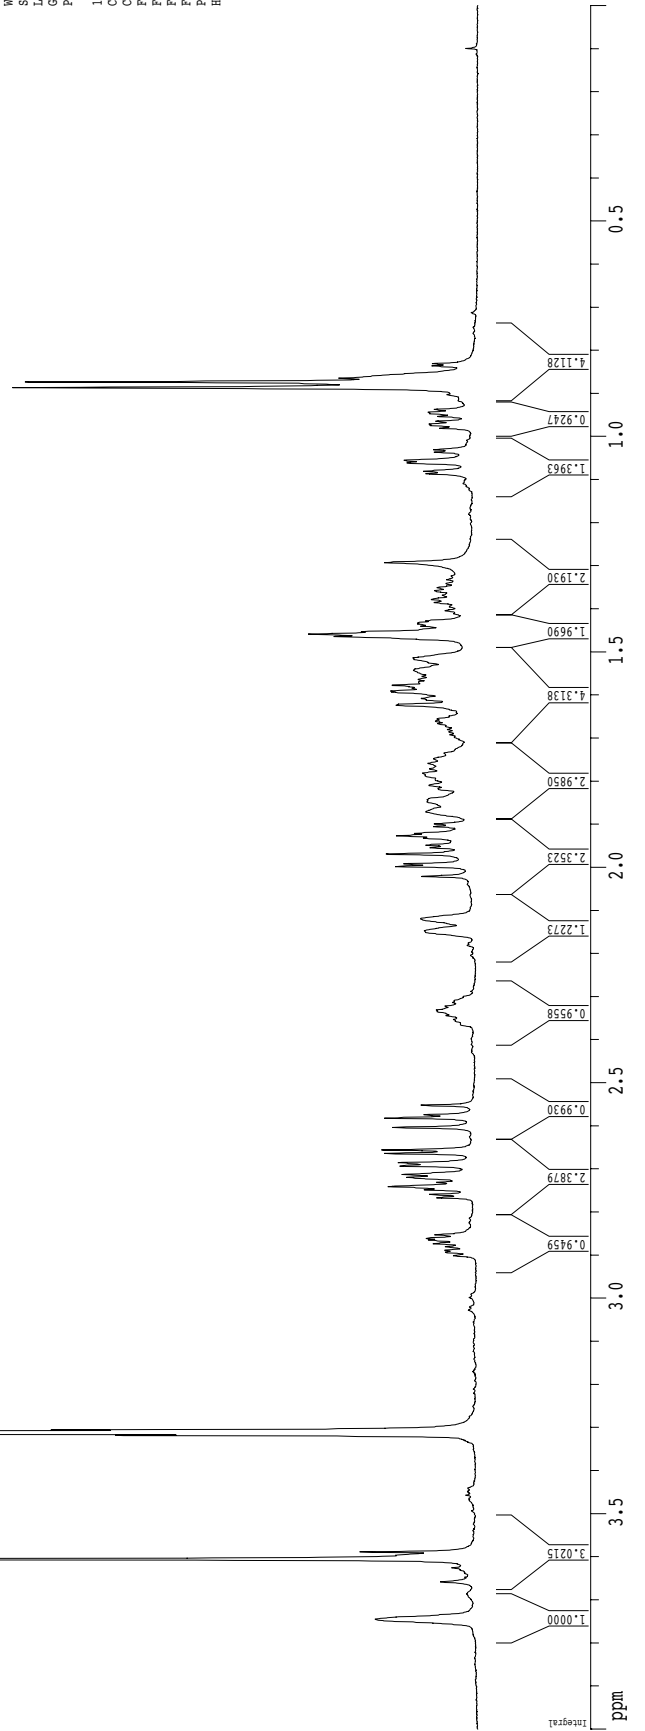

<sup>13</sup>C spectrum with <sup>1</sup>H decoupling

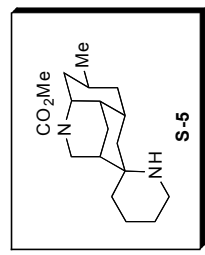

Free Base

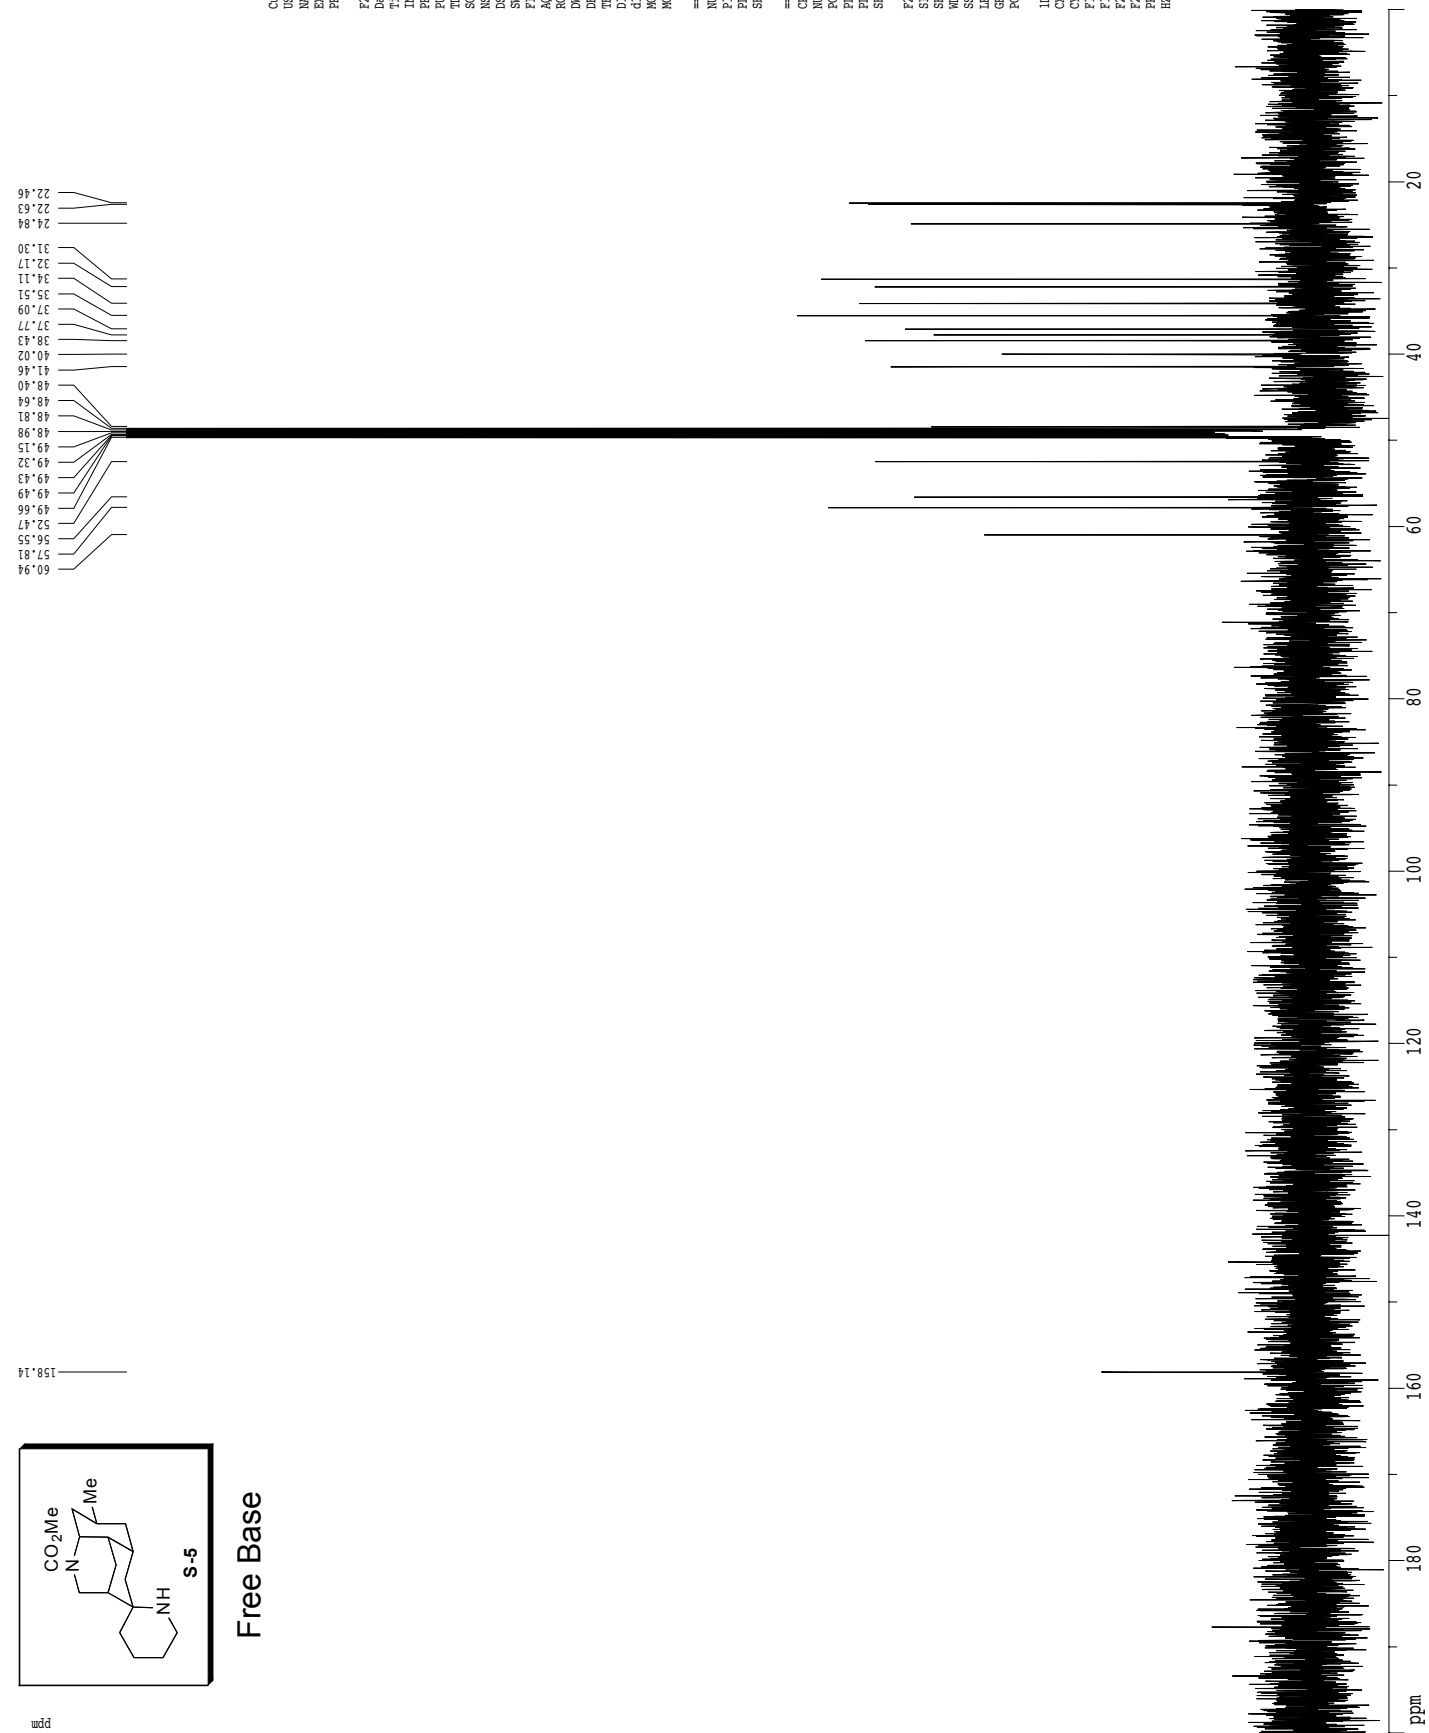

```

Current Data Parameters
USER          jgread
NAME         XT-2-293-MeOD-2
EXPNO        1
PROCNO       1

F2 - Acquisition Parameters
Date_        20080604
Time         8.30
INSTRUM     cryo500
PROBHD      5 mm CPCLH-
PULPROG     zgpg30
RG          654.0
SOLVENT     CDCl3
NS          634
DS          4
SWH         30303.031 Hz
FIDRES     0.463222 Hz
AQ         1.0794470 sec
RG         11585.2
DW         16.500 usec
DE         6.00 usec
TE         298.0 K
D1         1.0000000 sec
d11        0.0300000 sec
MCREST     0.0000000 sec
MCREST     0.0150000 sec

===== CHANNEL f1 =====
NUC1        13C
P1         14.75 usec
PL1         -0.00 dB
SFO1       125.7942548 MHz

===== CHANNEL f2 =====
CPDPRG2    walz16
NUC2        1H
PCPD2     100.00 usec
PL2        1.60 dB
PL12       24.80 dB
SFO2       500.2225011 MHz

F2 - Processing parameters
SI         65536
SF         125.7802260 MHz
WDW        EM
SSB        0
LB         1.00 Hz
GB         0
PC         2.00

ID NMR plot parameters
CX         22.80 cm
CY         256.20 cm
F1P        200.000 ppm
F2P        25156.04 Hz
F2P        0.000 ppm
F2         0.00 Hz
PPMCH      8.77193 ppm/cm
HZCM       1103.33533 Hz/cm
    
```

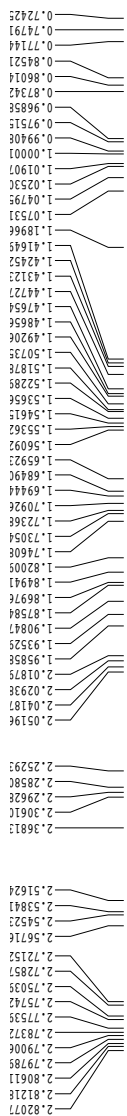

Free Base

Current Data Parameters  
 USER jgread  
 NAME xi-2-294-1e60D  
 EXPNO 1  
 PROCNO 1

F2 - Acquisition Parameters  
 Date\_ 20080605  
 Time 16.34  
 MSNAME cryo300  
 PROBHD 5 mm CPYX1 1.6  
 PULPROG zgpg30  
 TD 81728  
 SOLVENT CD3ODT  
 NS 8  
 DS 2  
 SWH 8012.820 Hz  
 FIDRES 0.098043 Hz  
 AQ 5.0998774 sec  
 RG 20.2  
 DW 62.400 usec  
 DE 6.00 usec  
 TE 298.0 K  
 MCREST 0.10000000 sec  
 MCHNK 0.01500000 sec

==== CHANNEL f1 =====  
 NU1 1H  
 P1 7.38 usec  
 PL1 1.60 dB  
 SFO1 500.2235015 MHz

F2 - Processing parameters  
 SI 65536  
 SF 500.2230188 MHz  
 WDW EM  
 SS 0.30 Hz  
 GB 0  
 PC 4.00

1D NMR plot parameters  
 CX 22.80 cm  
 CY 15.00 cm  
 FIP 4.000 ppm  
 F1 2000.88 Hz  
 F2P 0.500 ppm  
 F2 250.11 Hz  
 PRCH 0.15351 ppm/cm  
 HZCX 76.78616 Hz/cm

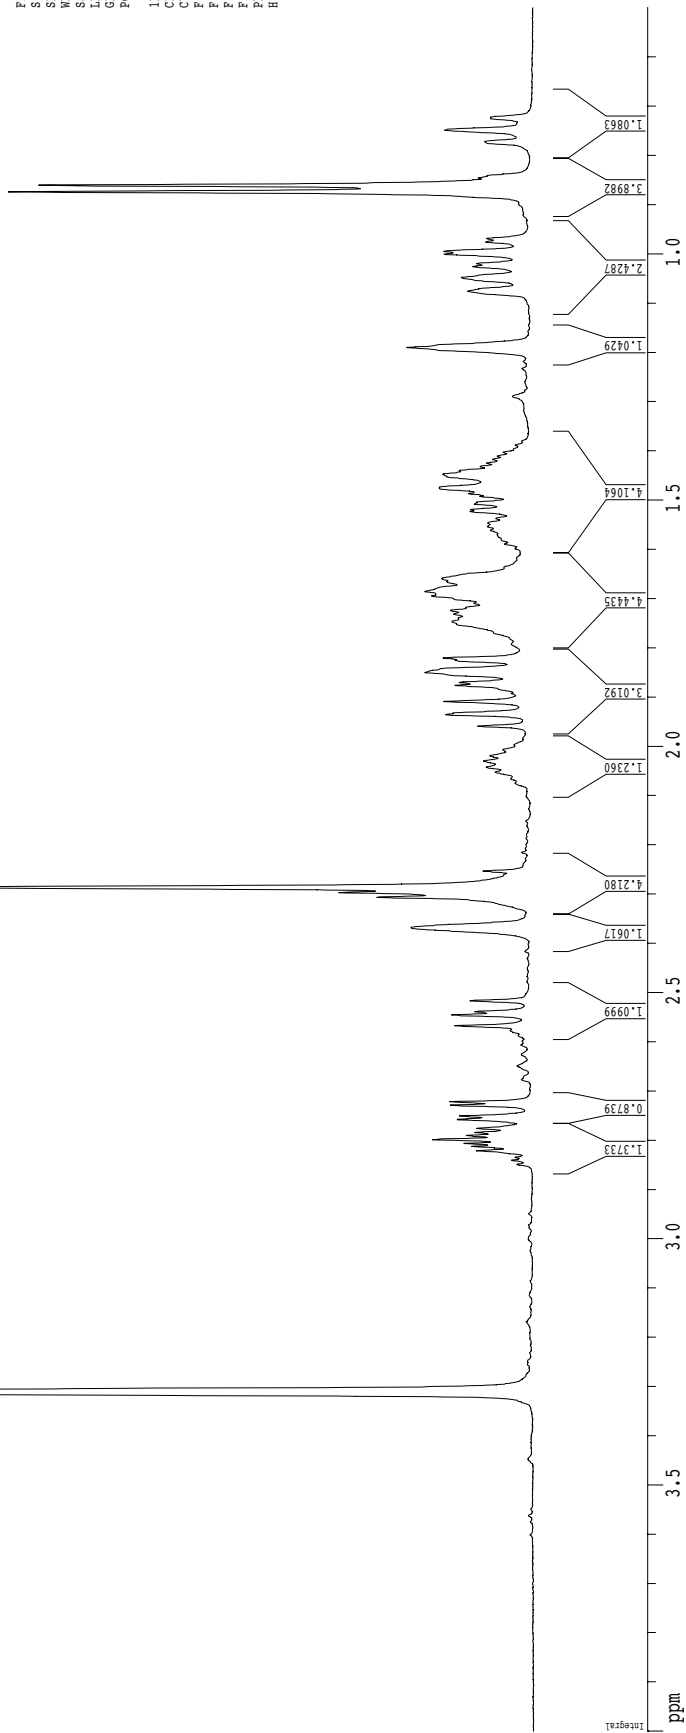

<sup>13</sup>C spectrum with <sup>1</sup>H decoupling

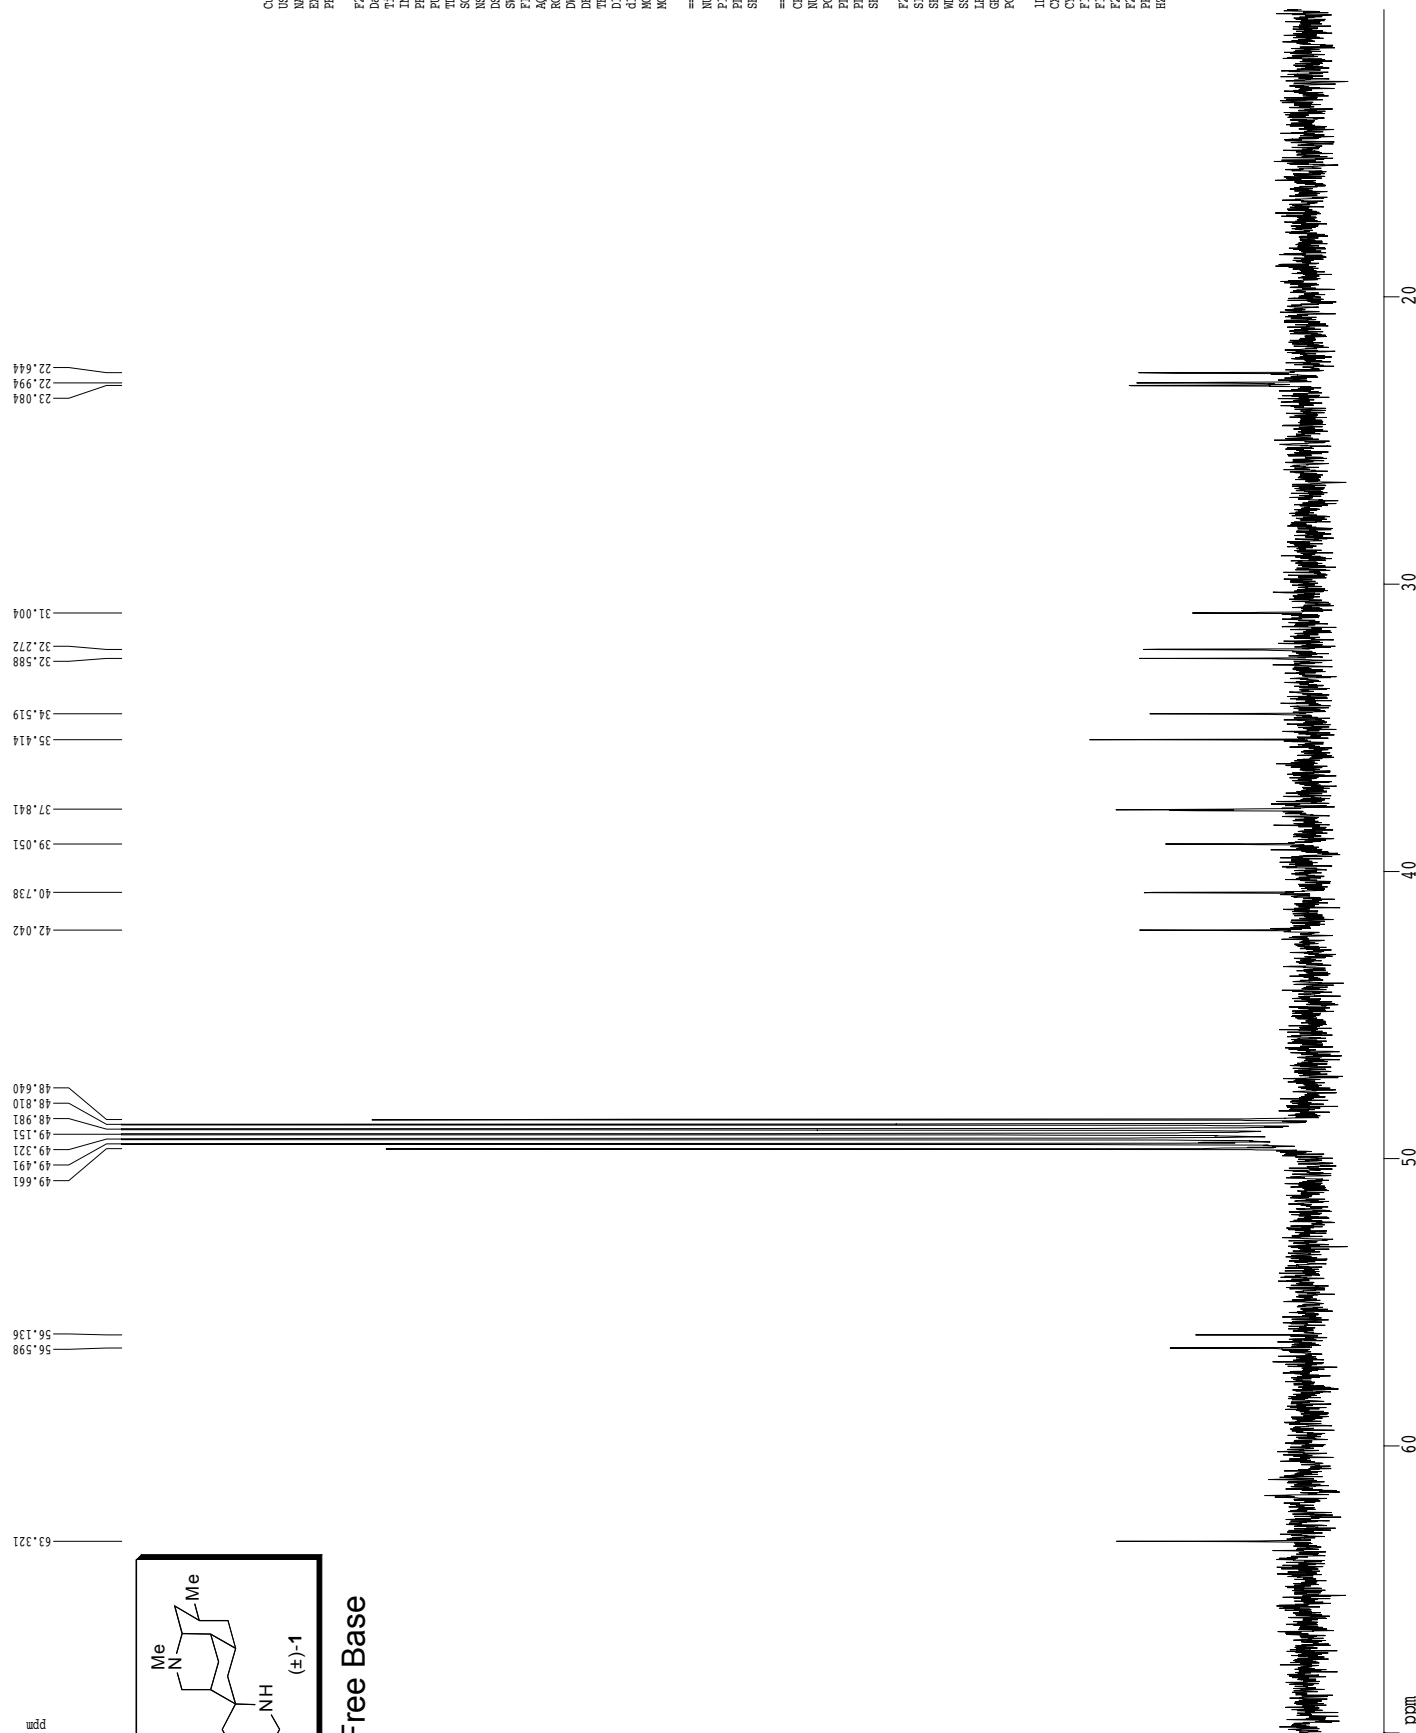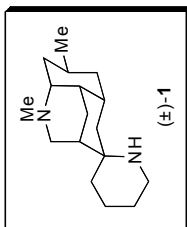

Free Base

Current Data Parameters  
 USER jread  
 NAME xr-2-294-MeOD  
 EXPNO 2  
 PROCNO 1

F2 - Acquisition Parameters  
 Date\_ 20080605  
 Time 16.38  
 INSTRUM cryo500  
 PROBD 5 mm CPCL1H-  
 PULPROG zgpg30  
 SOLVENT CDCl3  
 NS 212  
 DS 4  
 SWH 30303.031 Hz  
 FIDRES 0.463222 Hz  
 AQ 1.0794470 sec  
 RG 7298.2  
 DW 16.500 usec  
 DE 6.00 usec  
 TE 298.0 K  
 D1 0.25000000 sec  
 d11 0.03000000 sec  
 MCREST 0.00000000 sec  
 MCRBK 0.01500000 sec

==== CHANNEL f1 =====  
 NUC1 <sup>13</sup>C  
 P1 14.75 usec  
 PL1 -1.00 dB  
 SFO1 125.7942548 MHz

==== CHANNEL f2 =====  
 CPDPRG2 waltz16  
 NUC2 <sup>1</sup>H  
 PCPD2 100.00 usec  
 PL2 1.60 dB  
 PL12 24.80 dB  
 SFO2 500.2225011 MHz

F2 - Processing parameters  
 SI 65536  
 SF 125.7802251 MHz  
 EN  
 SSB 0  
 LB 1.00 Hz  
 GB  
 PC 2.00

ID NMR plot parameters  
 CX 22.80 cm  
 CY 86.86 cm  
 F1P 70.000 ppm  
 F1 8804.62 Hz  
 F2P 10.000 ppm  
 F2 1257.80 Hz  
 PPMCH 2.63158 ppm/cm  
 HZCH 331.00061 Hz/cm

1.63186  
1.64556  
1.66094  
1.67588  
1.68996  
1.70355  
1.71501  
1.76882  
1.77983  
1.79285  
1.96594  
1.97100  
1.97586  
2.22531  
2.23030  
2.23937  
2.24442  
2.25335  
2.25841

3.53374  
3.52141  
3.50844

7.38623  
7.37092  
7.36116  
7.32791  
7.31876  
7.31171  
7.30226  
7.27012

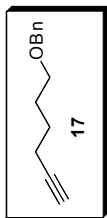

Current Data Parameters  
 USER jgread  
 NAME XI-2-188  
 EXPNO 1  
 PROCNO 1  
 F2 - Acquisition Parameters  
 Date\_ 20080112  
 Time 14.16  
 INSTRUM crys500  
 PROBRD 5 mm CPXI 1H-  
 PULPROG zg30  
 TD 81728  
 SOLVENT CDCl3  
 NS 1  
 DS 2  
 SWH 8012.820 Hz  
 FIDRES 0.098043 Hz  
 AQ 5.0958774 sec  
 RG 4  
 DW 62.40 usec  
 DE 6.00 usec  
 TE 288.0 K  
 D1 0.10000000 sec  
 MCREST 0.00000000 sec  
 MCWPK 0.01500000 sec  
 ===== CHANNEL f1 =====  
 NUC1 1H  
 P1 8.00 usec  
 PL1 1.60 dB  
 SFO1 500.2235015 MHz  
 F2 - Processing parameters  
 SI 65536  
 SF 500.220256 MHz  
 EQ 1  
 MW 0  
 FM 0  
 SSB 0  
 LB 0.30 Hz  
 GB 0  
 PC 4.00  
 1D NMR plot parameters  
 CX 22.80 cm  
 CY 15.00 cm  
 FIP 10.000 ppm  
 F1 500.220 Hz  
 F2 10.000 ppm  
 F3 -500.32 ppm  
 PRGM 0.48246 ppm/cm  
 HZCN 241.33423 Hz/cm

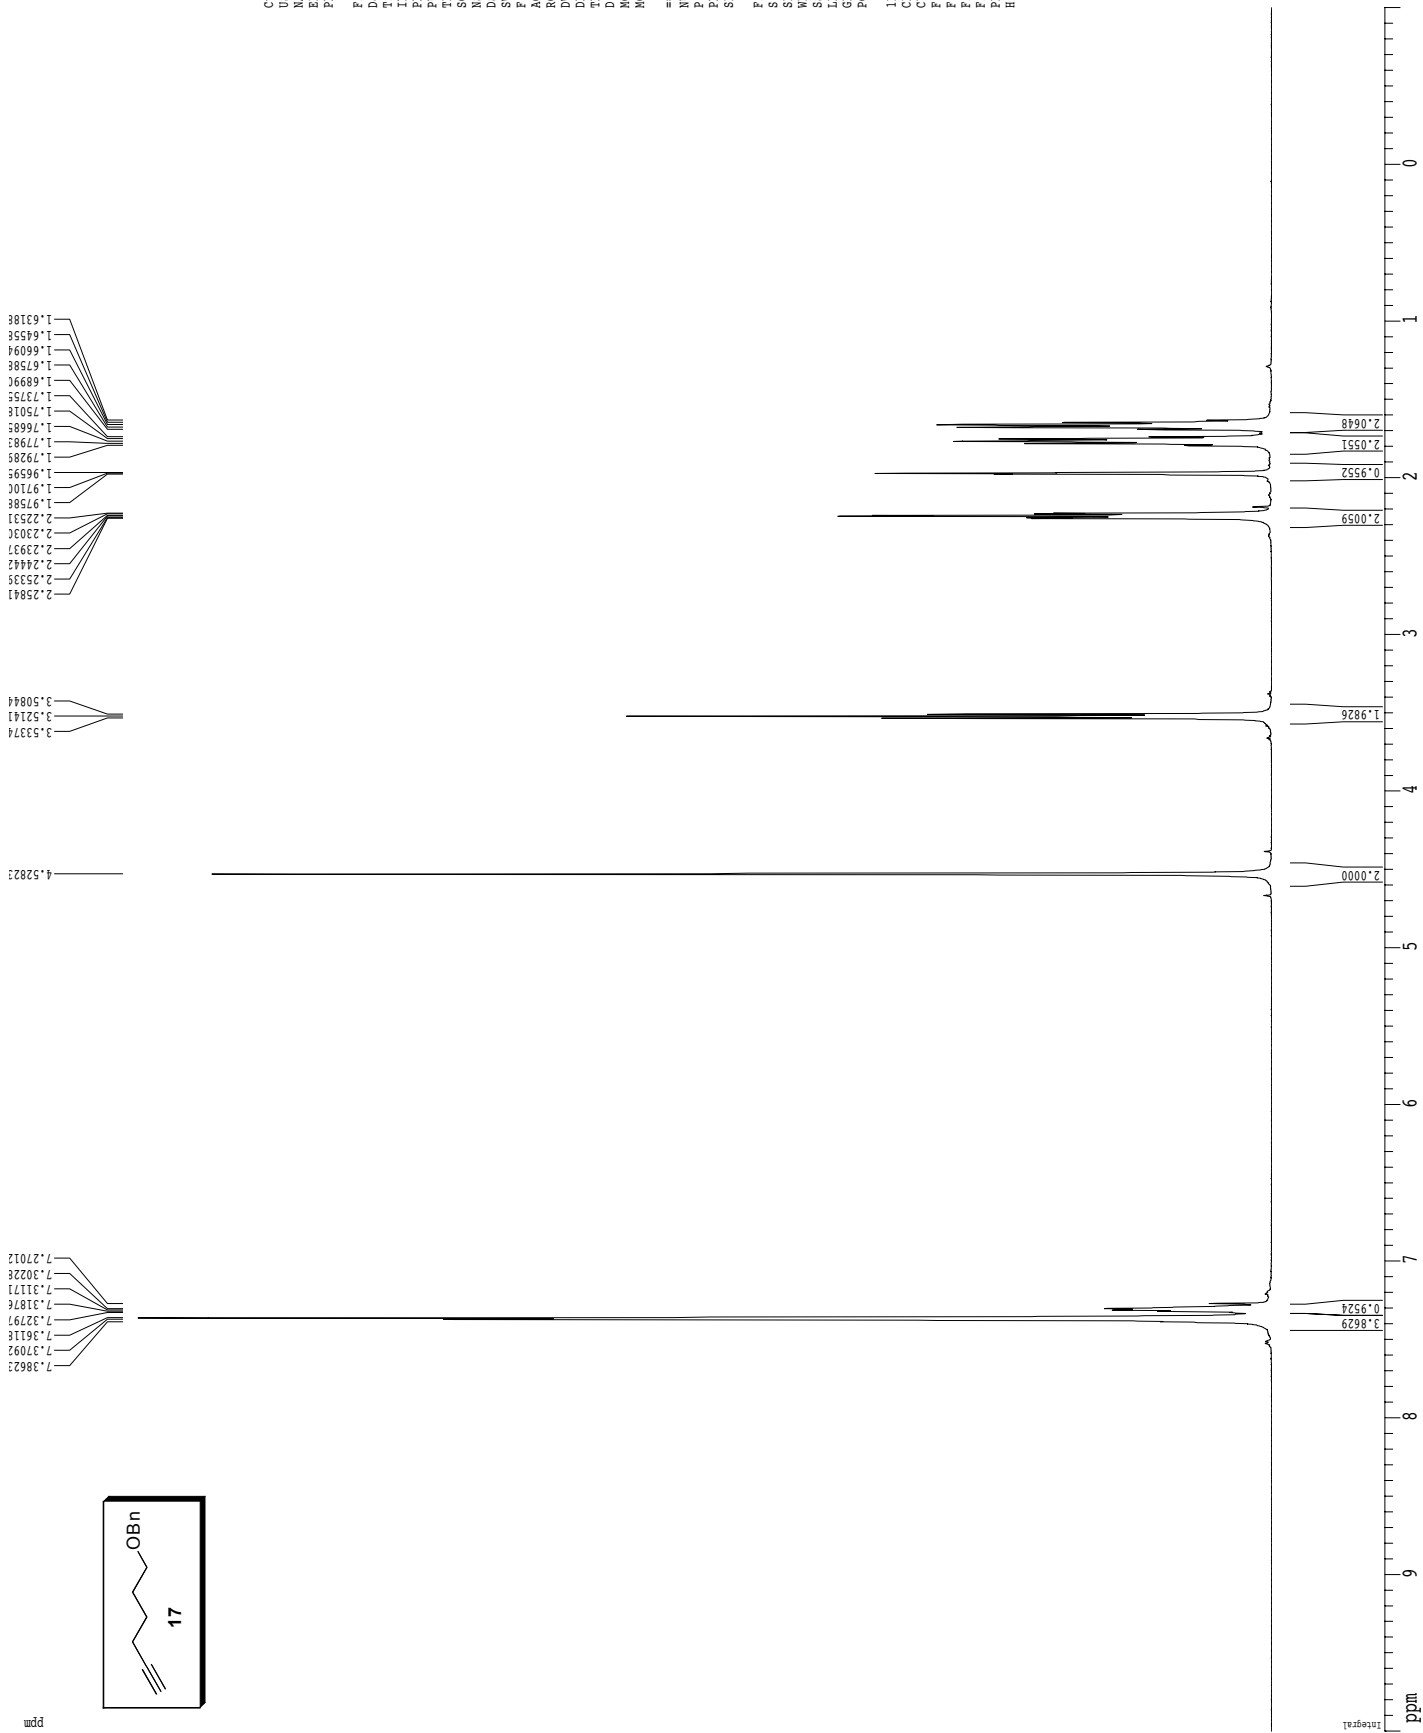

13C spectrum with 1H decoupling

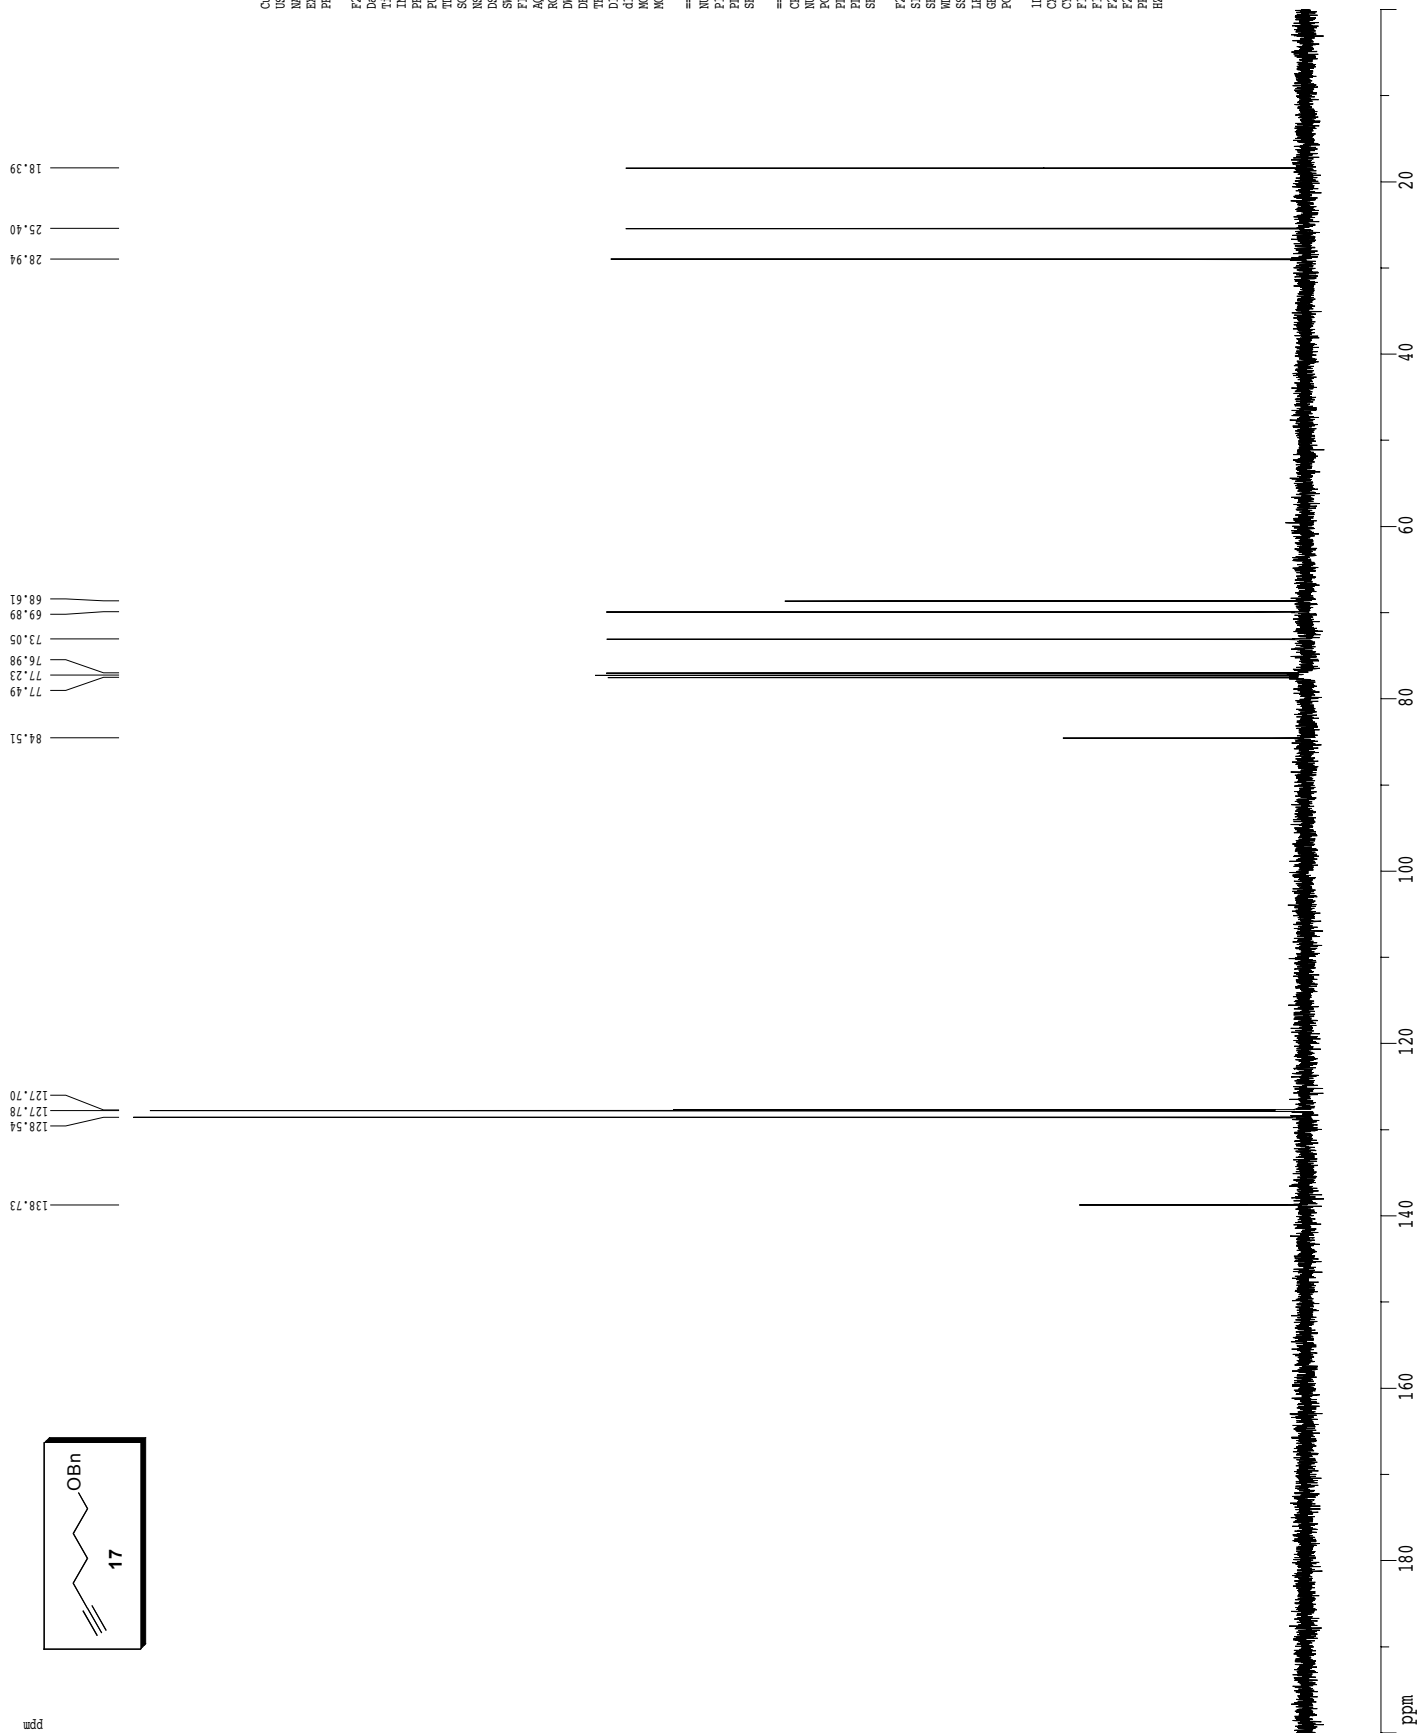

```

Current Data Parameters
USER          jgread
NAME          XI-2-188-C
EXPNO         1
PROCNO        1

F2 - Acquisition Parameters
Date_         20080112
Time          14.22
INSTRUM       cryo500
PROBHD        5 mm CPCL1 H-
PULPROG       zgpg30
RG            654.8
SOLVENT       CDCl3
NS            31
DS            4
SWH           30303.031 Hz
FIDRES        0.463222 Hz
AQ            1.0794470 sec
RG            13004
DW            16.500 usec
DE            6.00 usec
TE            298.0 K
D1            0.25000000 sec
d11           0.03000000 sec
MCREST        0.00000000 sec
MCPRK         0.01500000 sec

===== CHANNEL f1 =====
NUC1          13C
P1            15.00 usec
PL1           -1.00 dB
SFO1          125.7942548 MHz

===== CHANNEL f2 =====
CPDPRG2       walz16
NUC2          1H
PCPD2         100.00 usec
PL2           1.60 dB
PL12          23.54 dB
SFO2          500.2225011 MHz

F2 - Processing parameters
SI            65536
SF            125.7804066 MHz
WDW           EM
SSB           0
LB            1.00 Hz
GB            0
PC            2.00

ID NMR plot parameters
CX            22.80 cm
CY            15.65 cm
F1P           200.000 ppm
F1            25156.08 Hz
F2P           0.000 ppm
F2            0.00 Hz
PFMCH         8.77193 ppm/cm
HZCM          1103.33691 Hz/cm
    
```



<sup>1</sup>H spectrum

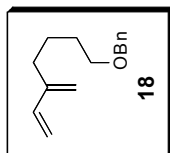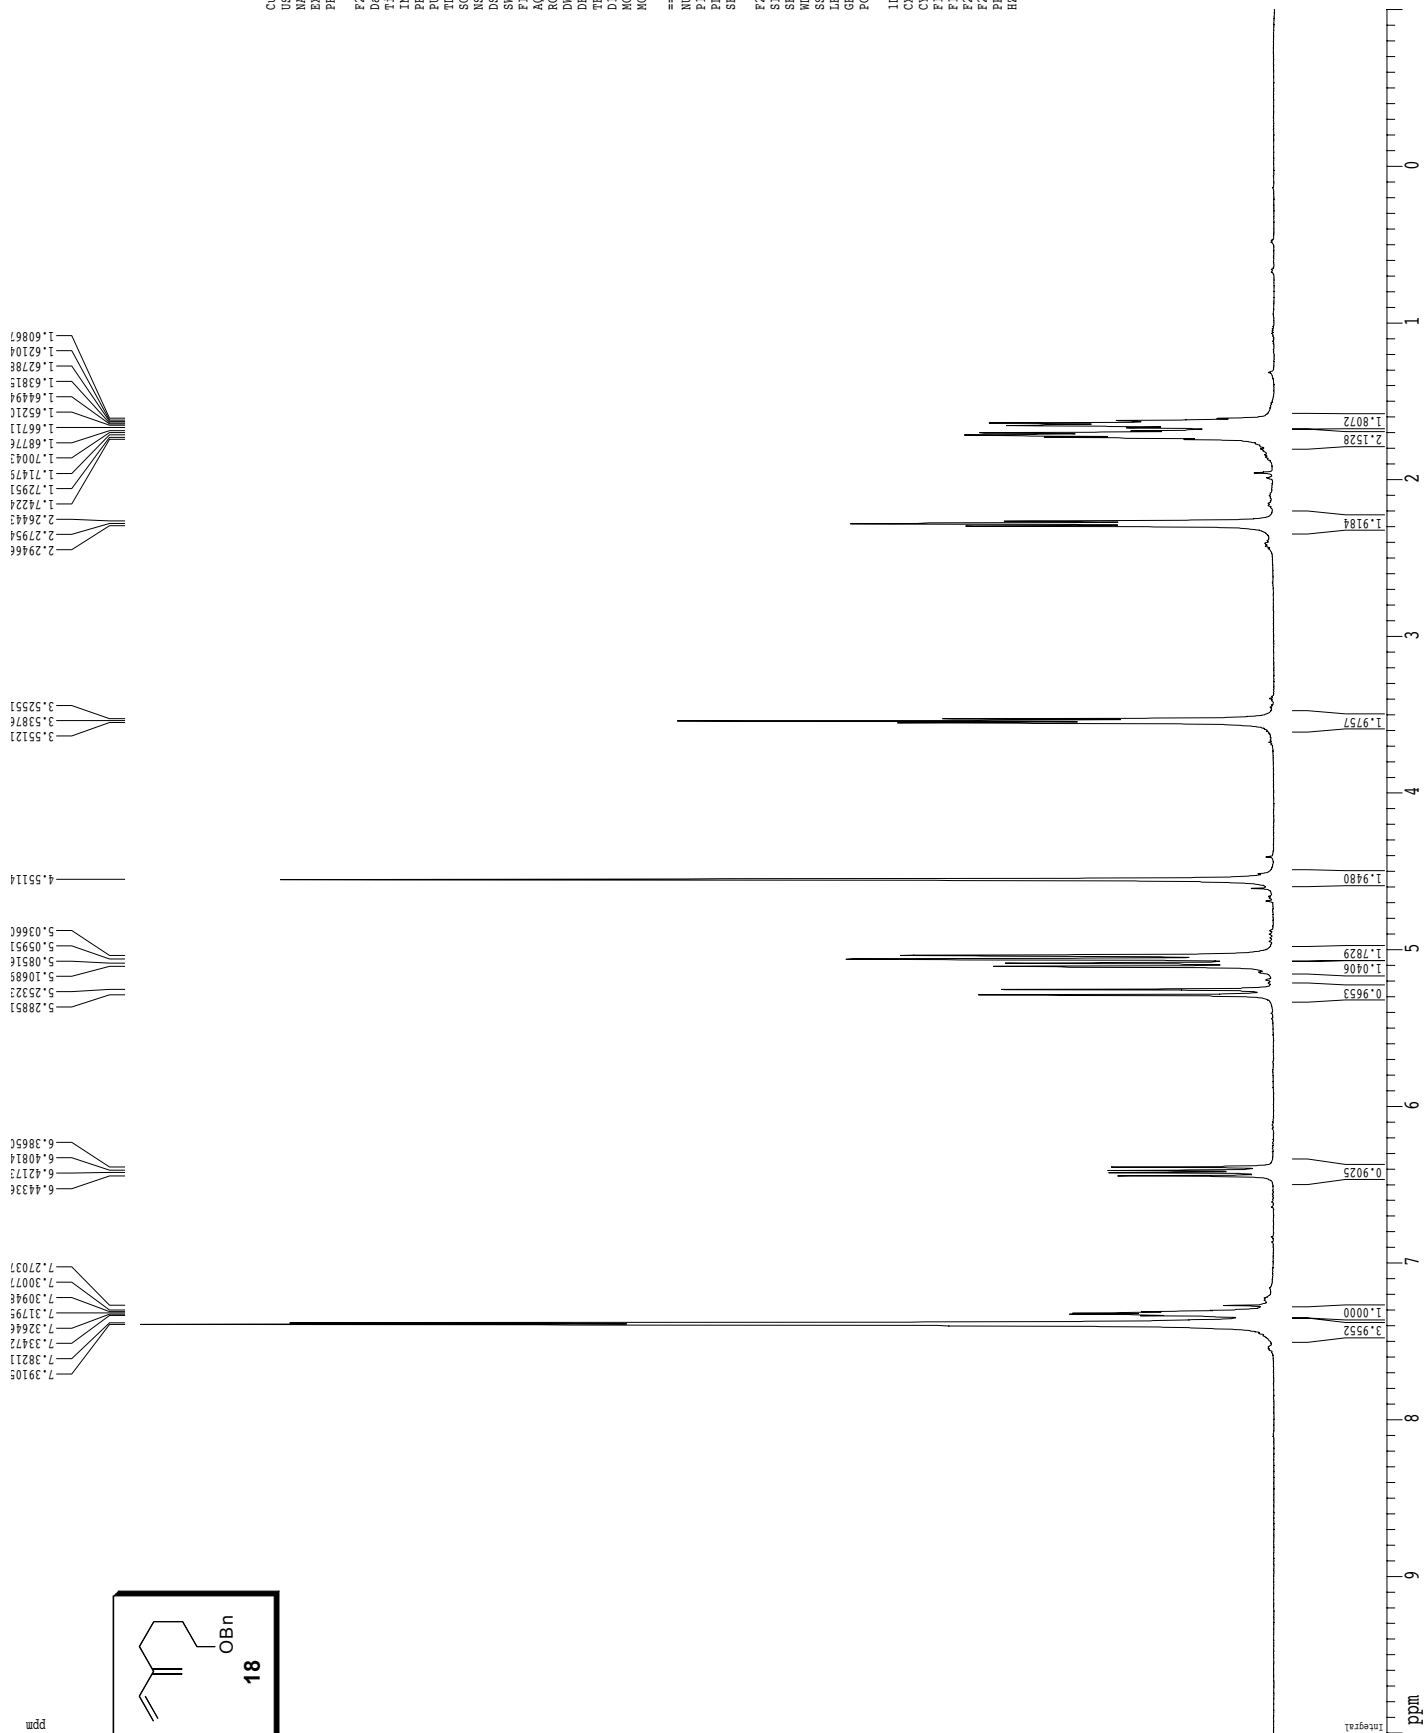

```

Current Data Parameters
USER      jread
NAME      XI-2-19--HPLC
EXPNO     1
PROCNO    1

F2 - Acquisition Parameters
Date_     20080117
Time      14.04
INSTRUM   spect
PROBHD    5 mm CPCT-1H-
PULPROG   zg30
TD         81728
SOLVENT   CDCl3
NS         1
DS         2
SHR       8012.820 Hz
FIDRES    0.098043 Hz
AQ         5.0998774 sec
RG         3.2
DW         62.400 usec
DE         6.00 usec
TE         300.2 K
D1         0.10000000 sec
d11        0.00000000 sec
MCREST    0.00000000 sec
MCWBK     0.01500000 sec

===== CHANNEL f1 =====
NUC1      1H
P1        8.00 usec
PL1       1.60 dB
SFO1      500.2235015 MHz

F2 - Processing parameters
SI        65536
SF        500.220251 MHz
WDW       EM
SSB       0
LB        0.30 Hz
GB        0
PC        4.00

ID NMR plot parameters
CX        22.80 cm
CY        15.00 cm
F1        10.000 ppm
F2        5002.20 Hz
F3        -1.000 ppm
F4        -500.22 Hz
NUC1      1H
PRG1      18
PCOR      241.33423 Hz/cm
    
```

<sup>13</sup>C spectrum with <sup>1</sup>H decoupling

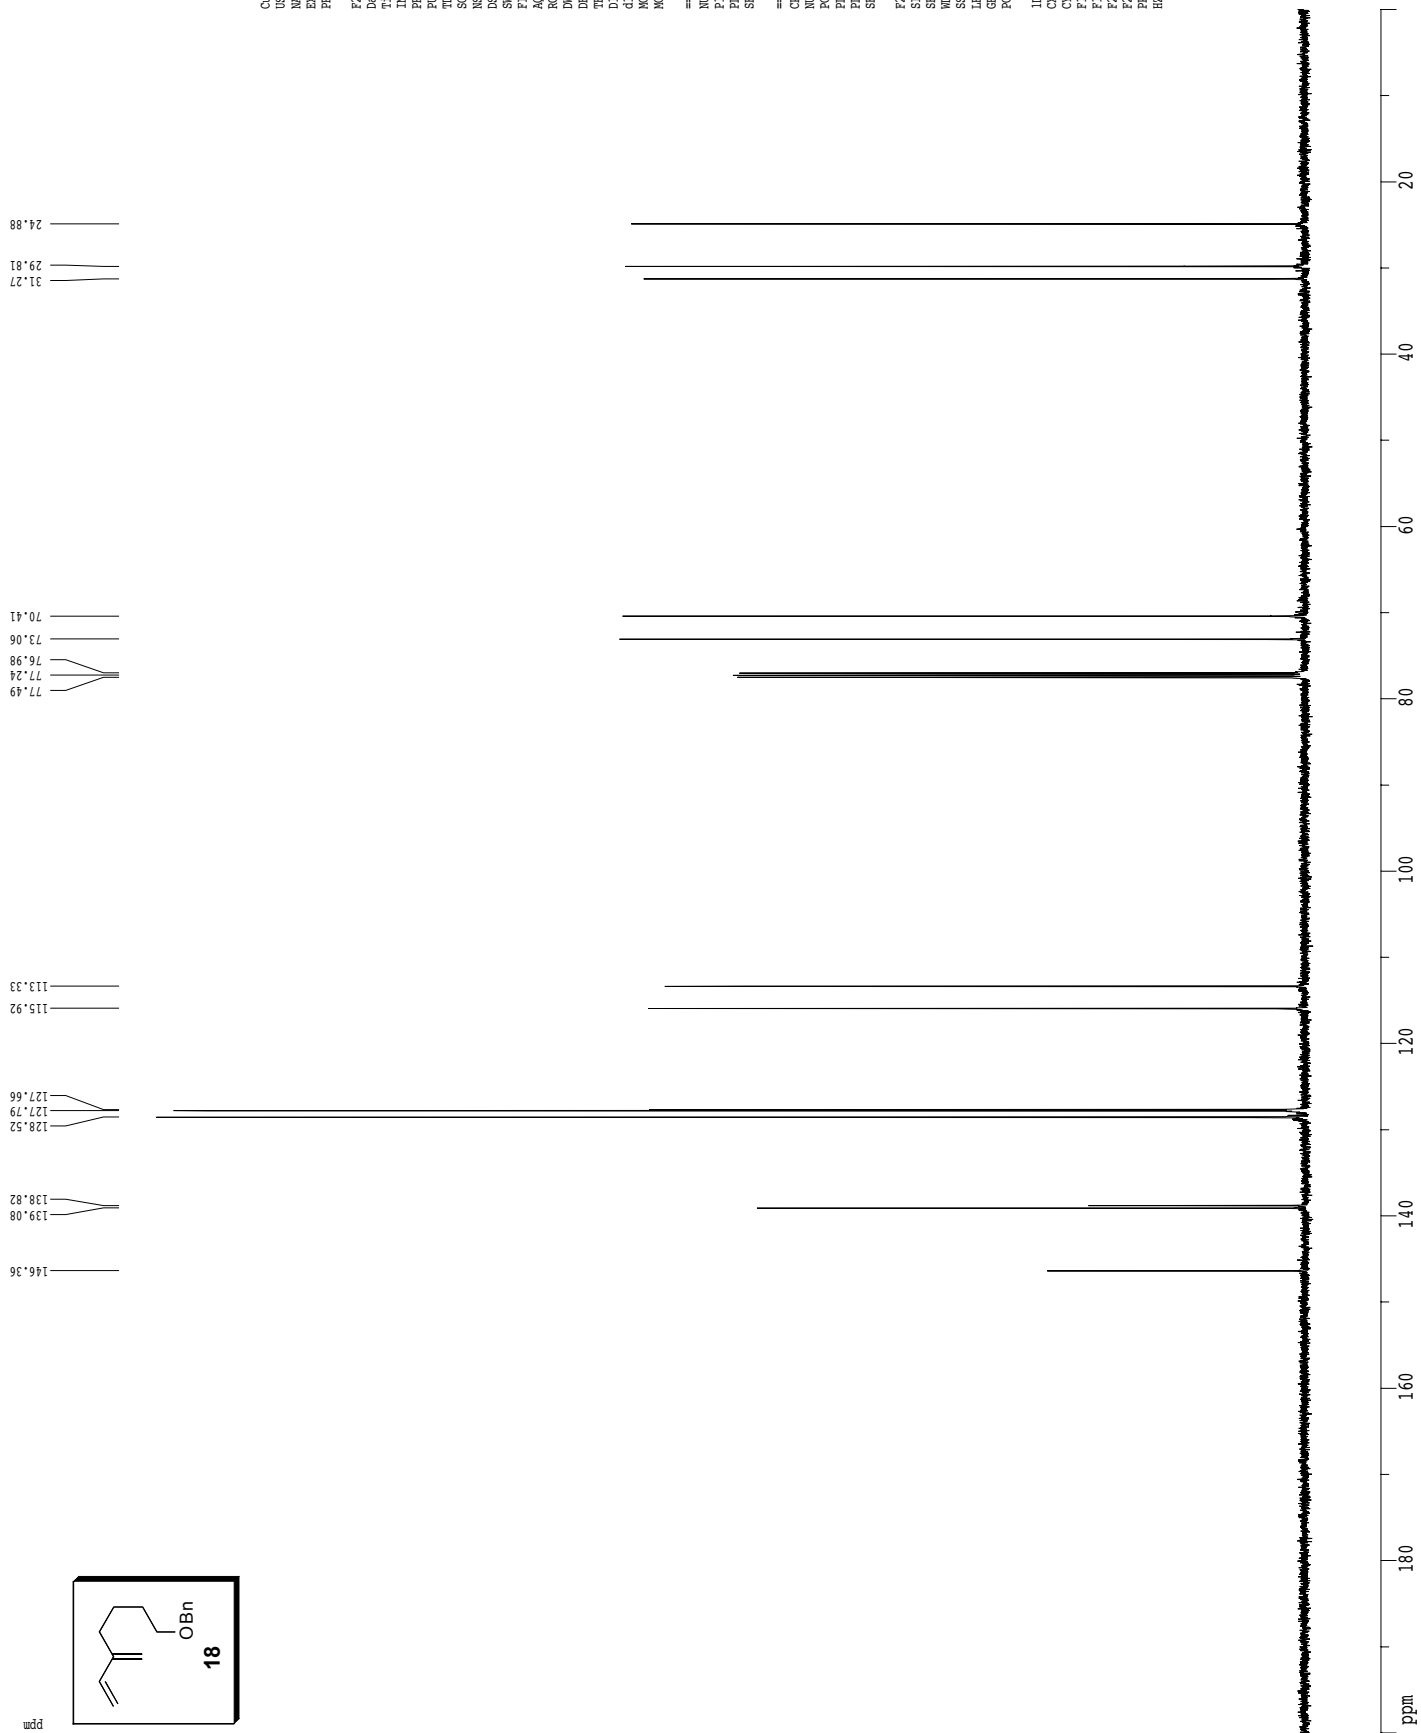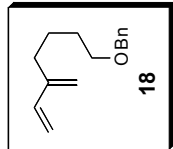

<sup>1</sup>H spectrum

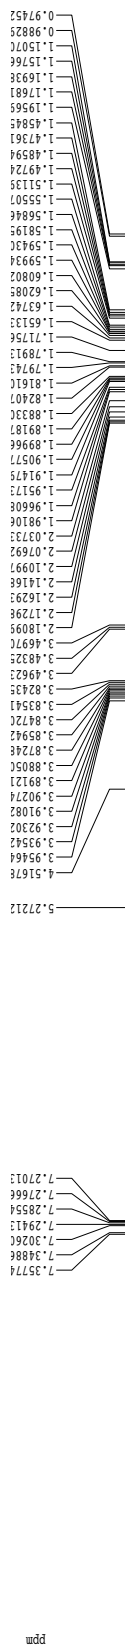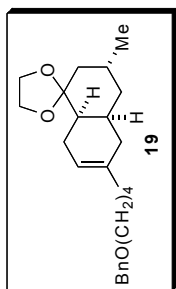

Current Data Parameters  
 USER jgread  
 NAME XI-2-193-HPLC  
 EXPNO 1  
 PROCNO 1

F2 - Acquisition Parameters  
 Date\_ 20160122  
 Time 13:03:33  
 INSTRUM crysco  
 PROBM 5 mm CPCT 1H-  
 PULPROG zg30  
 TD 81728  
 SOLVENT CDCl3  
 NS 1  
 DS 2  
 SHF 801.2820 Hz  
 FIDRES 0.098043 Hz  
 AQ 5.0998774 sec  
 RG 3.6  
 DW 62.400 usec  
 DE 6.00 usec  
 TE 300.2 K  
 D1 0.10000000 sec  
 MCREST 0.00000000 sec  
 MCWBK 0.01500000 sec

==== CHANNEL f1 =====  
 NUC1 1H  
 P1 8.00 usec  
 PL1 1.60 dB  
 SFO1 500.2235015 MHz

F2 - Processing parameters  
 SI 65536  
 SF 500.2202250 MHz  
 EQ 0  
 SSB 0  
 LB 0.30 Hz  
 GB 0  
 PC 4.00

1D NMR plot parameters  
 CX 22.80 cm  
 CY 15.00 cm  
 FIP 10.000 ppm  
 F1 5002.20 Hz  
 F2 -1.000 ppm  
 F3 0.00000000 Hz  
 FWHM 0.4882 Hz/cm  
 HECM 241.3423 Hz/cm

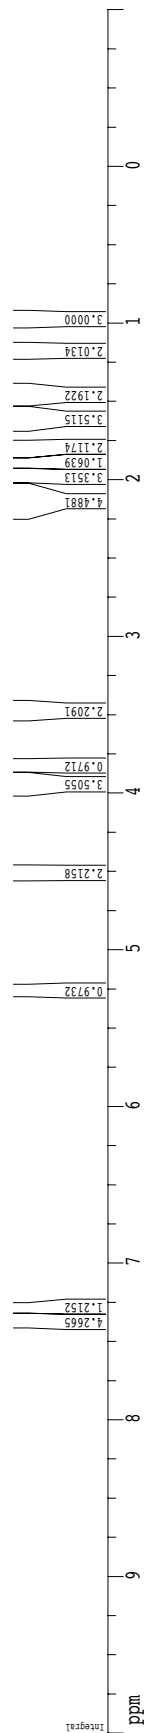

Integral

## 13C spectrum with 1H decoupling

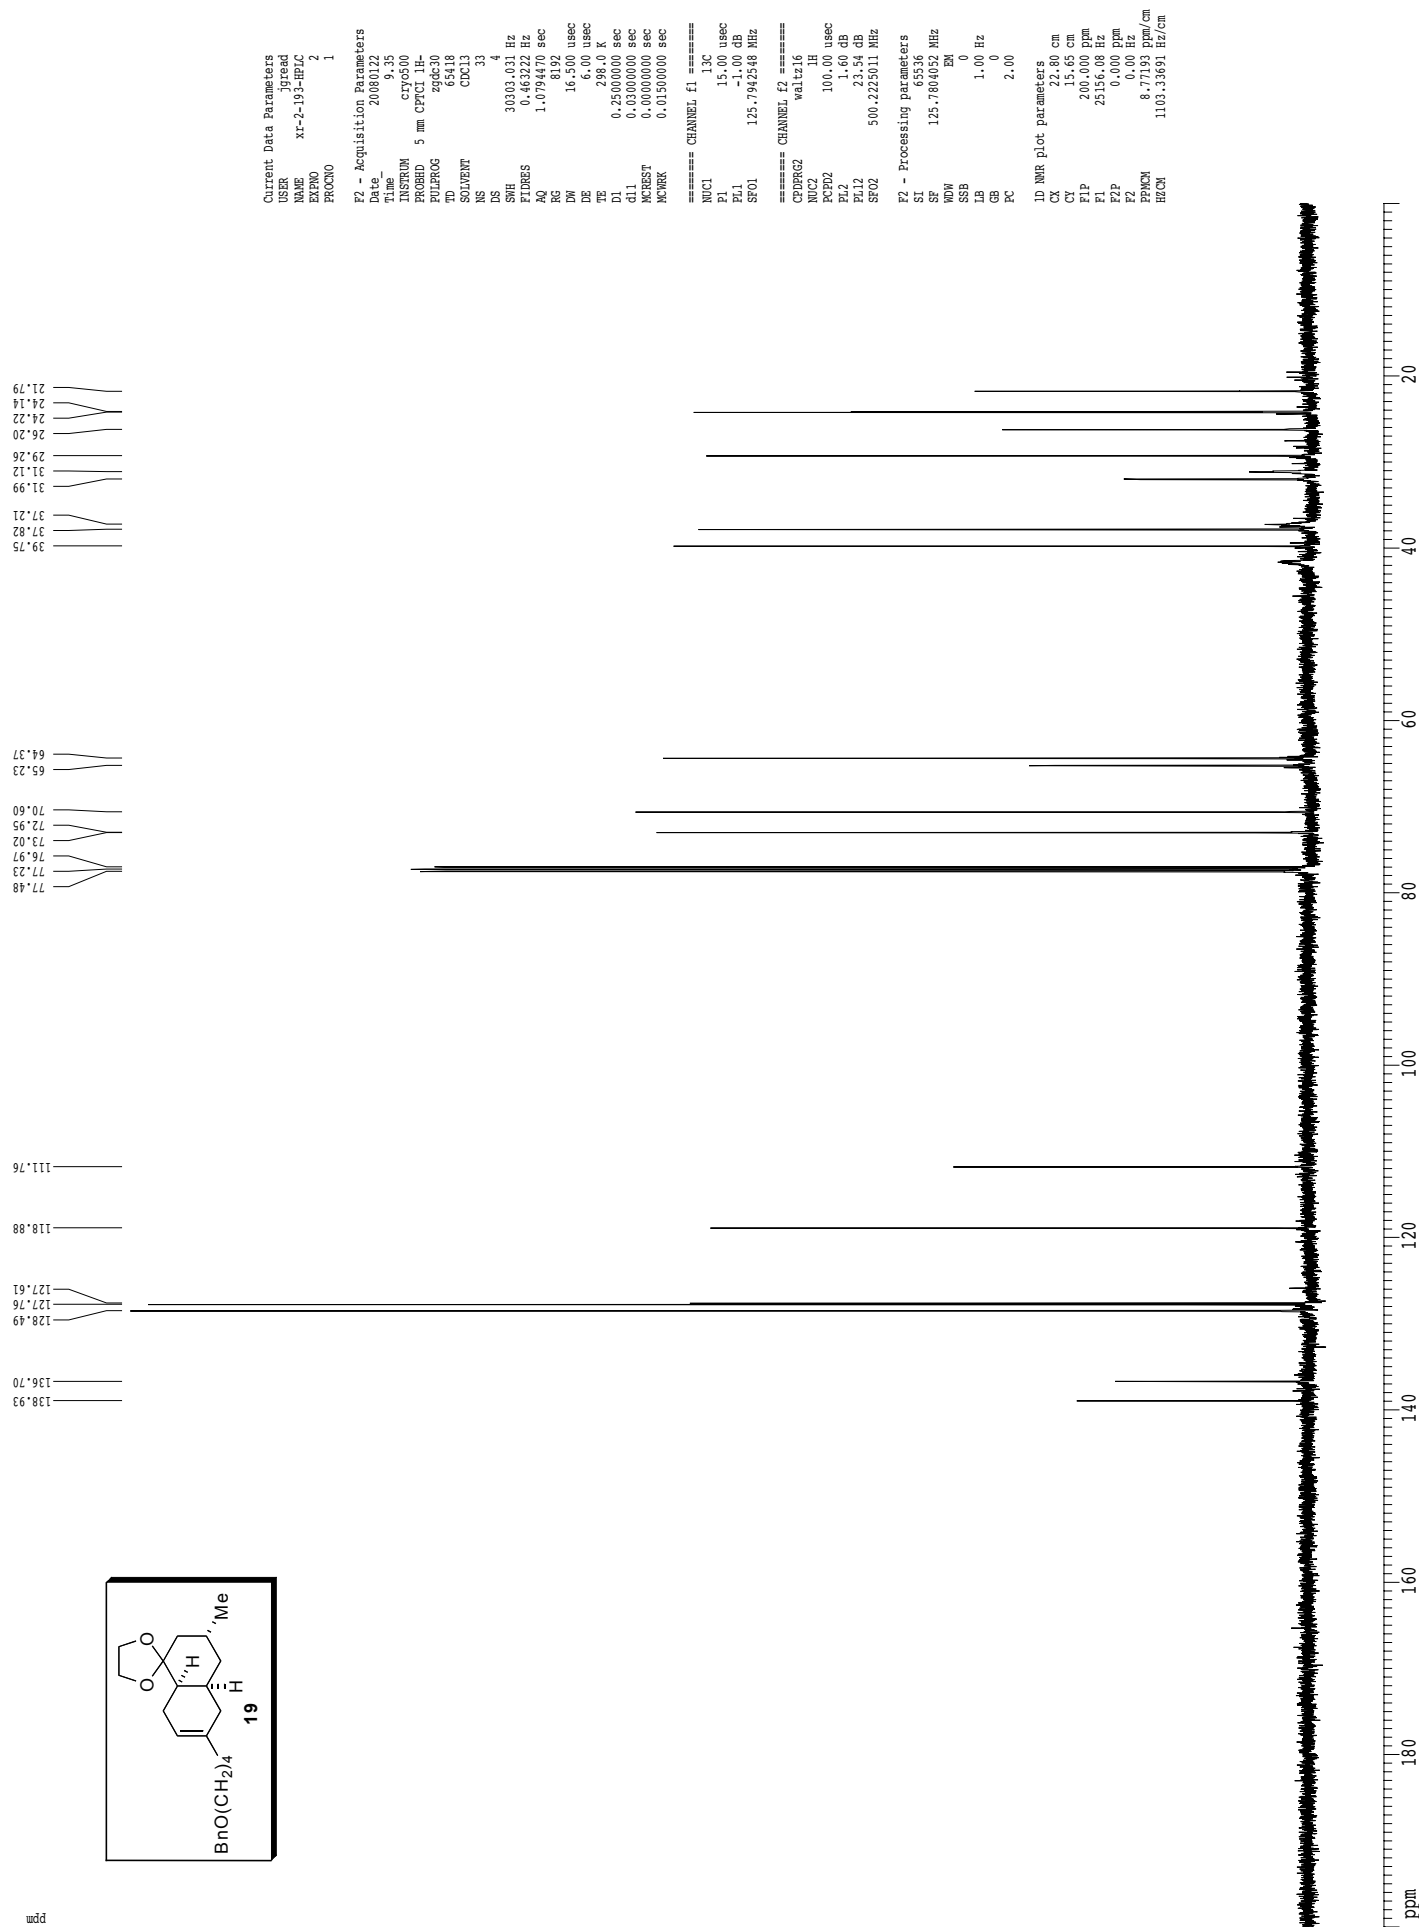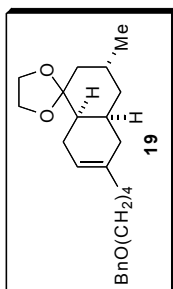

XR-2-200  
75 mg  
1H spectrum

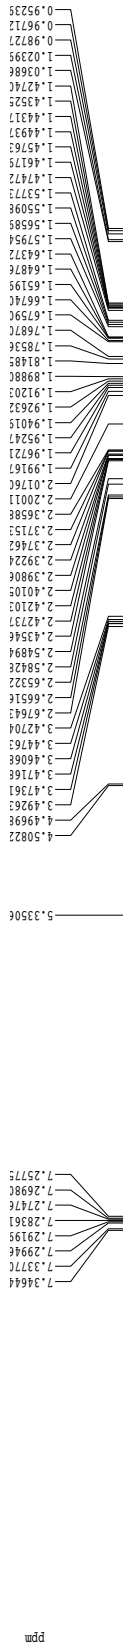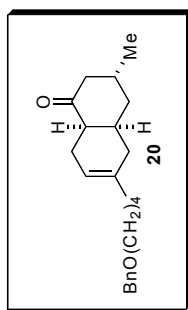

```

Current Data Parameters
USER          jgread
NAME          XR-2-200
EXPNO         1
PROCNO        1

F2 - Acquisition Parameters
Date_         20080123
Time          15.53
INSTRUM       gm500
PROBHD        5 mm broadband
PULPROG       zg30
TD            6430
SOLVENT       CDCl3
NS            1
DS            2
SWH           801.2820 Hz
FIDRES        0.098043 Hz
AQ            5.0958774 sec
RG            45.3
DR            62.00 usec
TE            298.0 K
D1            0.10000000 sec
MCREST        0.00000000 sec
MCWRK         0.01500000 sec

===== CHANNEL f1 =====
NUC1          1H
P1            12.00 usec
PL1           -3.00 dB
SFO1          499.8284988 MHz

F2 - Processing parameters
SI            65536
SF            499.825252 MHz
WDW           EM
SSB           0
LB            0.30 Hz
GB            0
PC            4.00

1D NMR plot parameters
CX            22.80 cm
CY            15.00 cm
F1           10.000 ppm
F2           499.623 Hz
F3           -499.633 ppm
P1MCM        0.48246 ppm/cm
HZCM         241.14366 Hz/cm
    
```

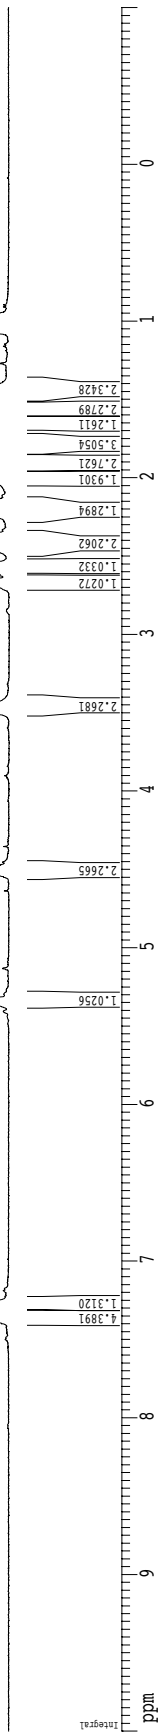

## 13C spectrum with 1H decoupling

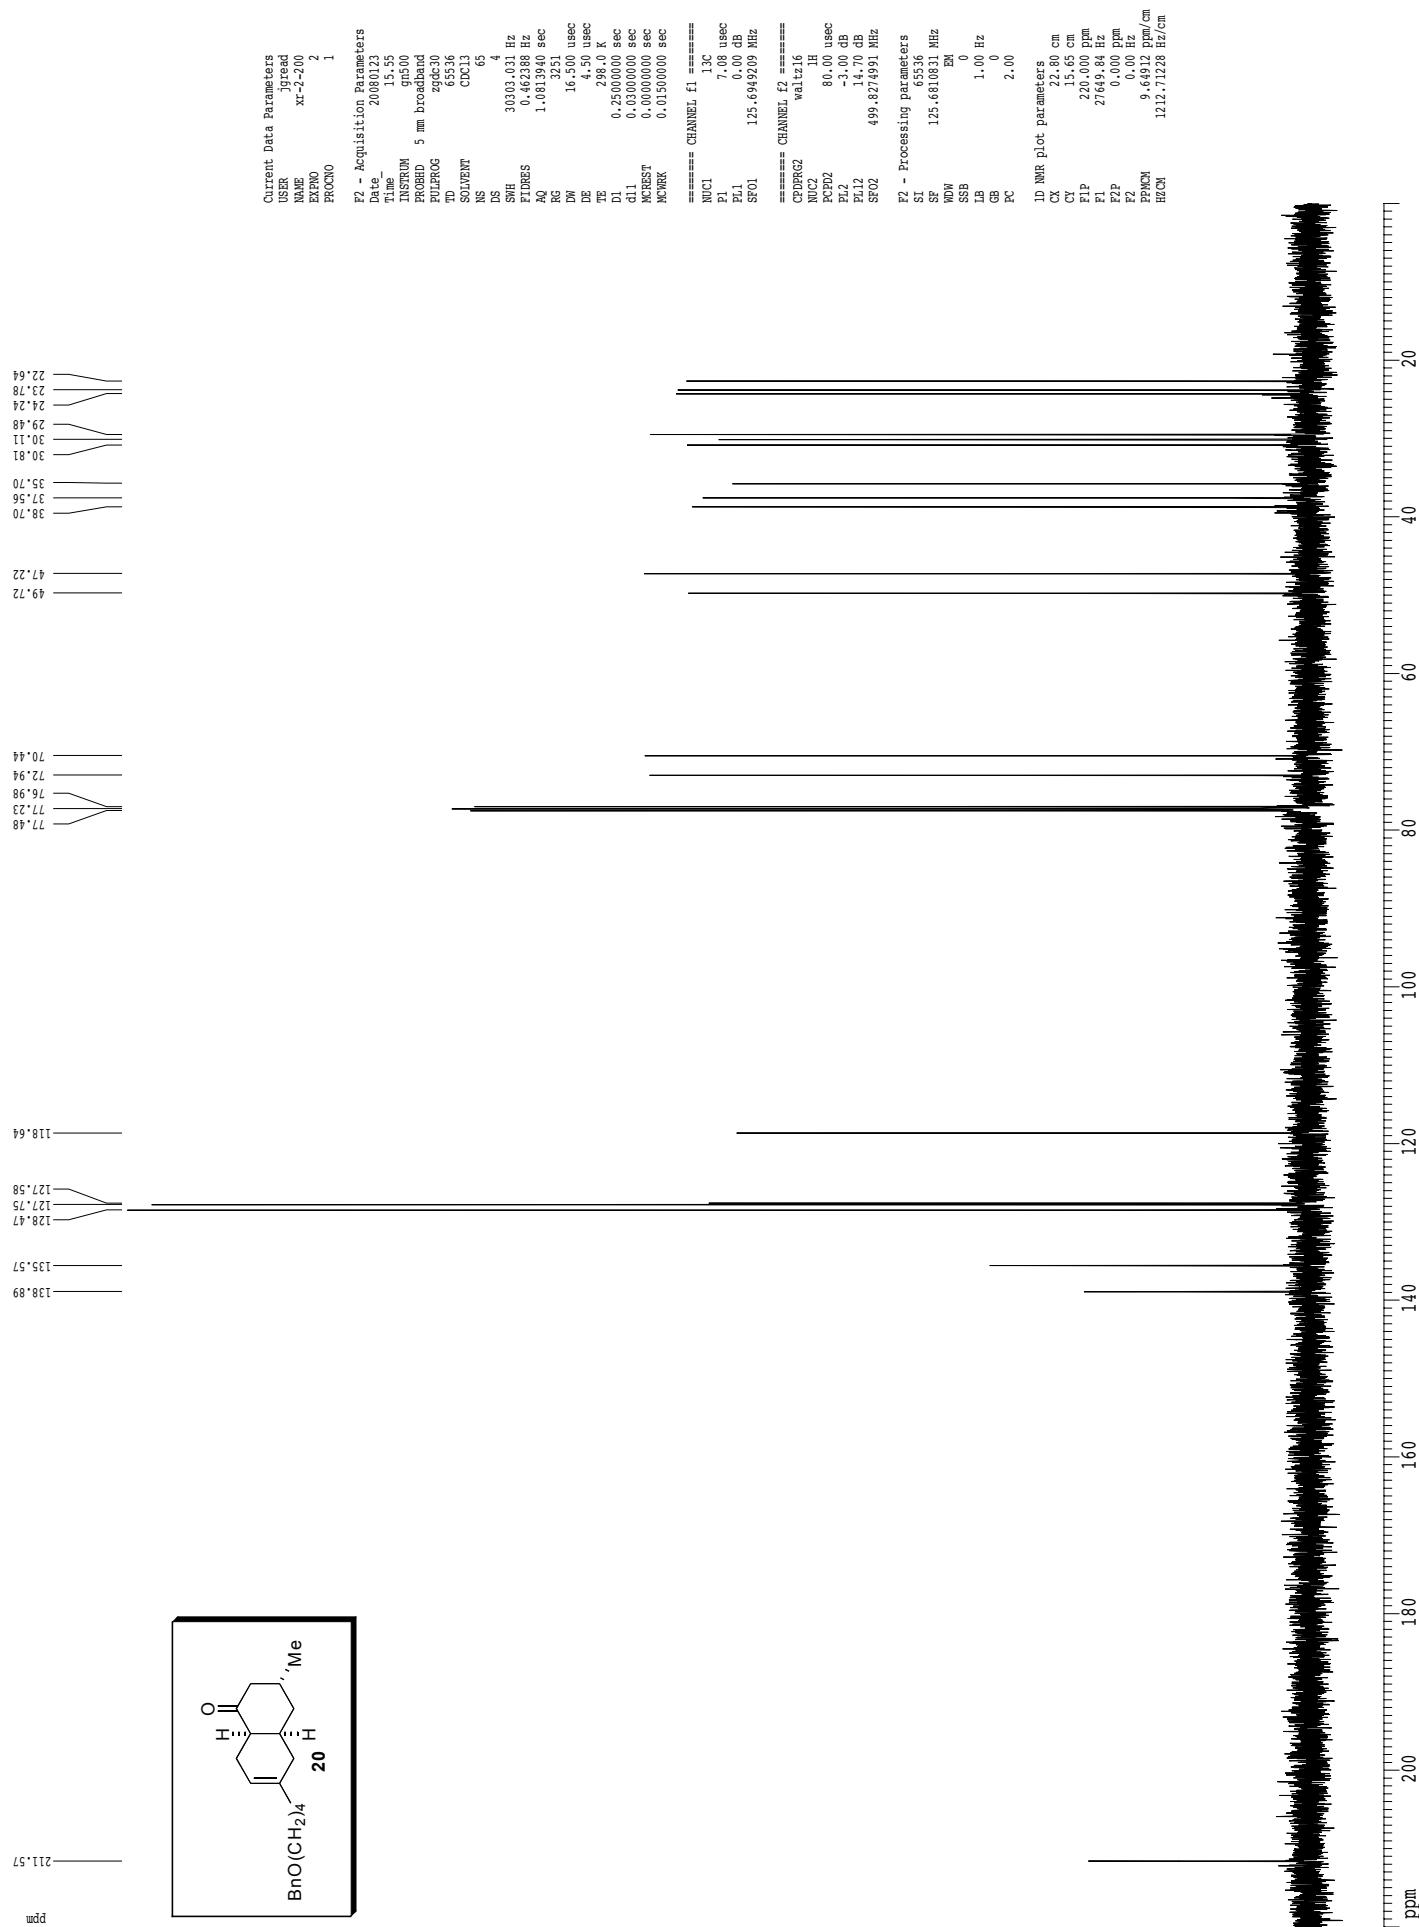

<sup>1</sup>H spectrum

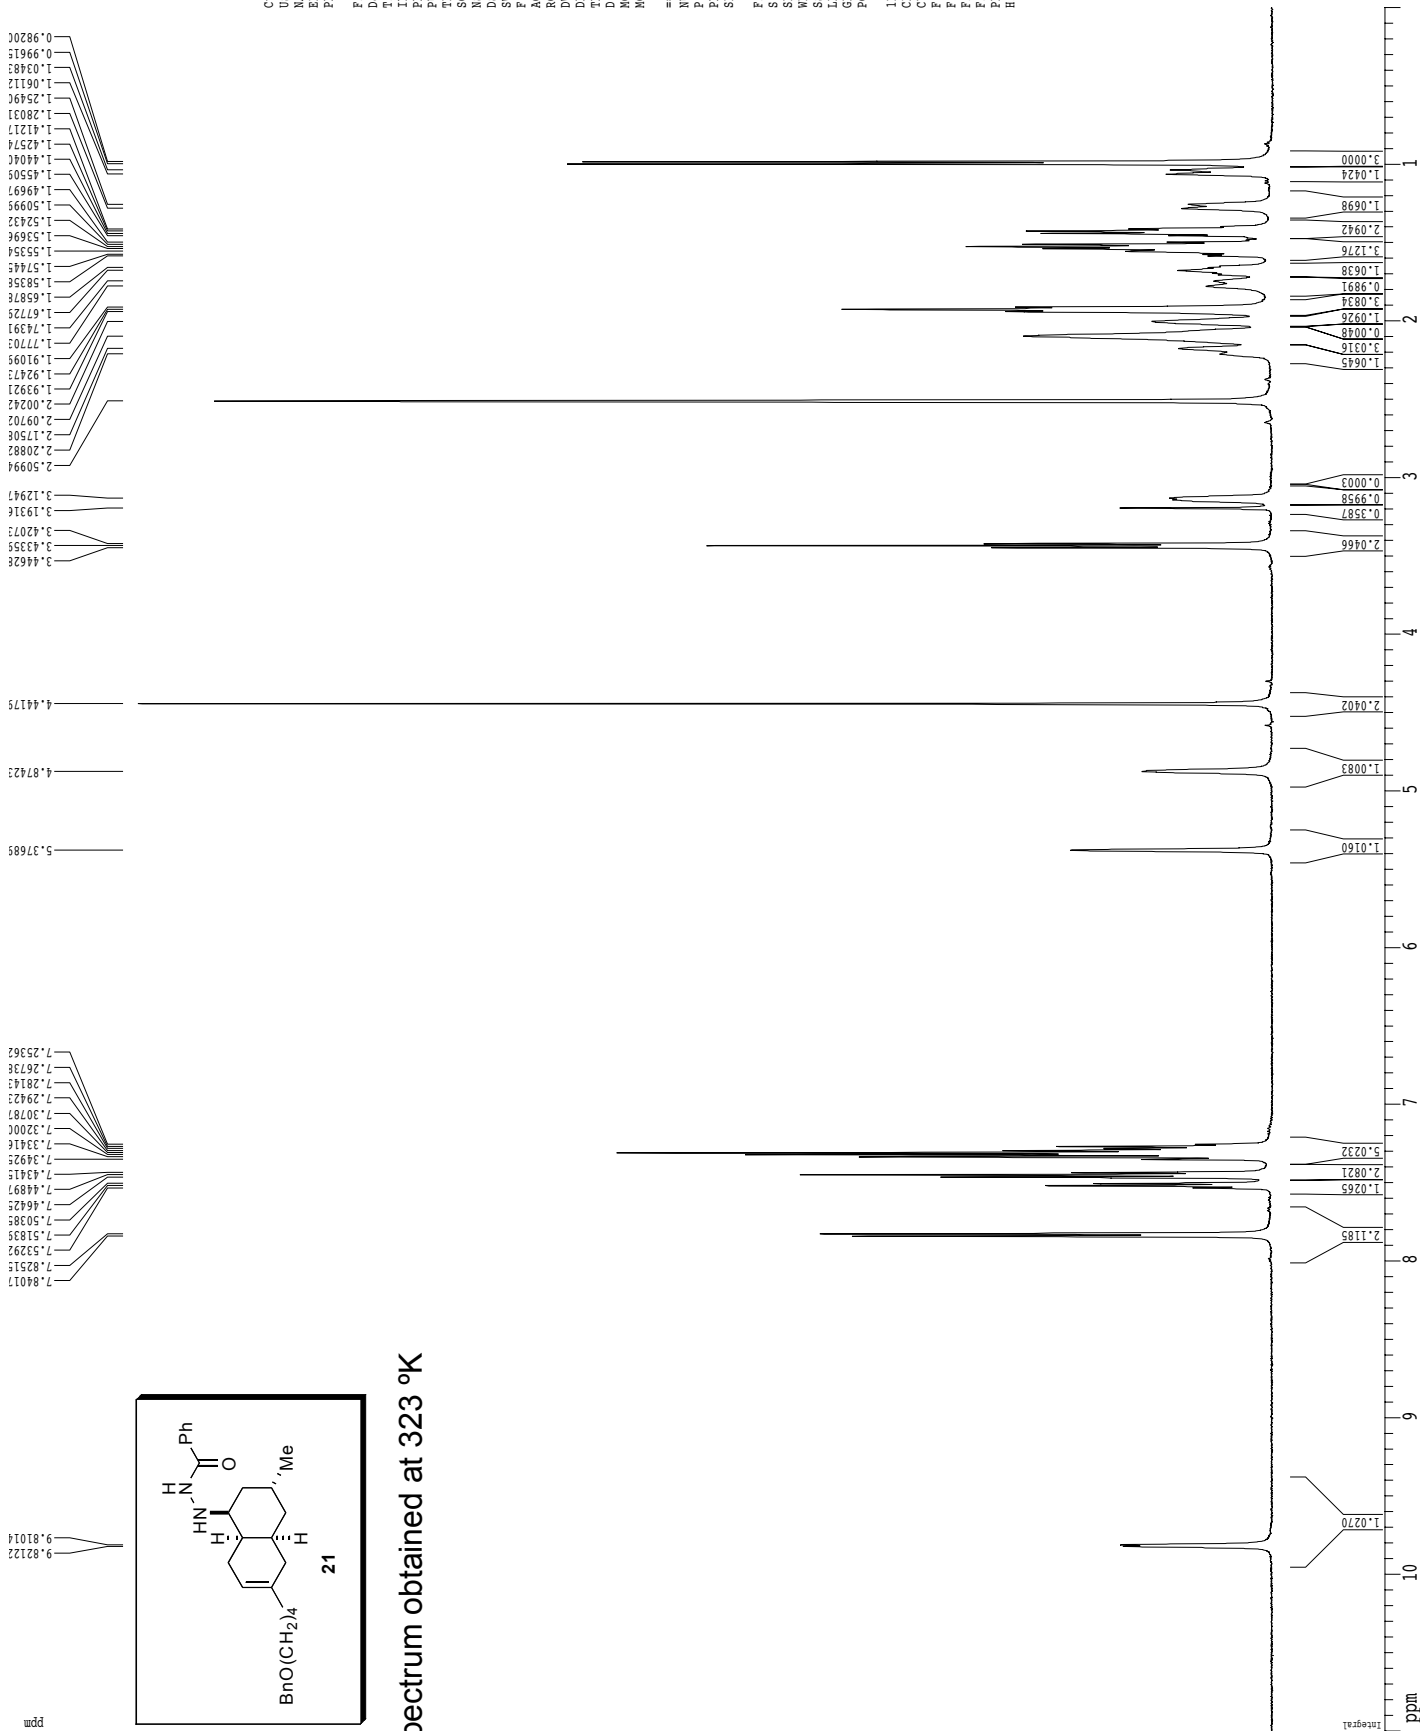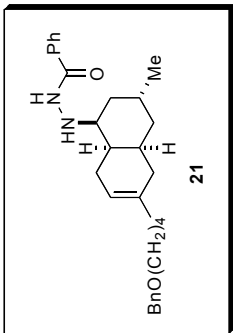

Spectrum obtained at 323 °K

## 13C spectrum with 1H decoupling

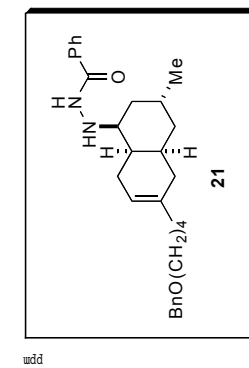

## Spectrum obtained at 340 °K

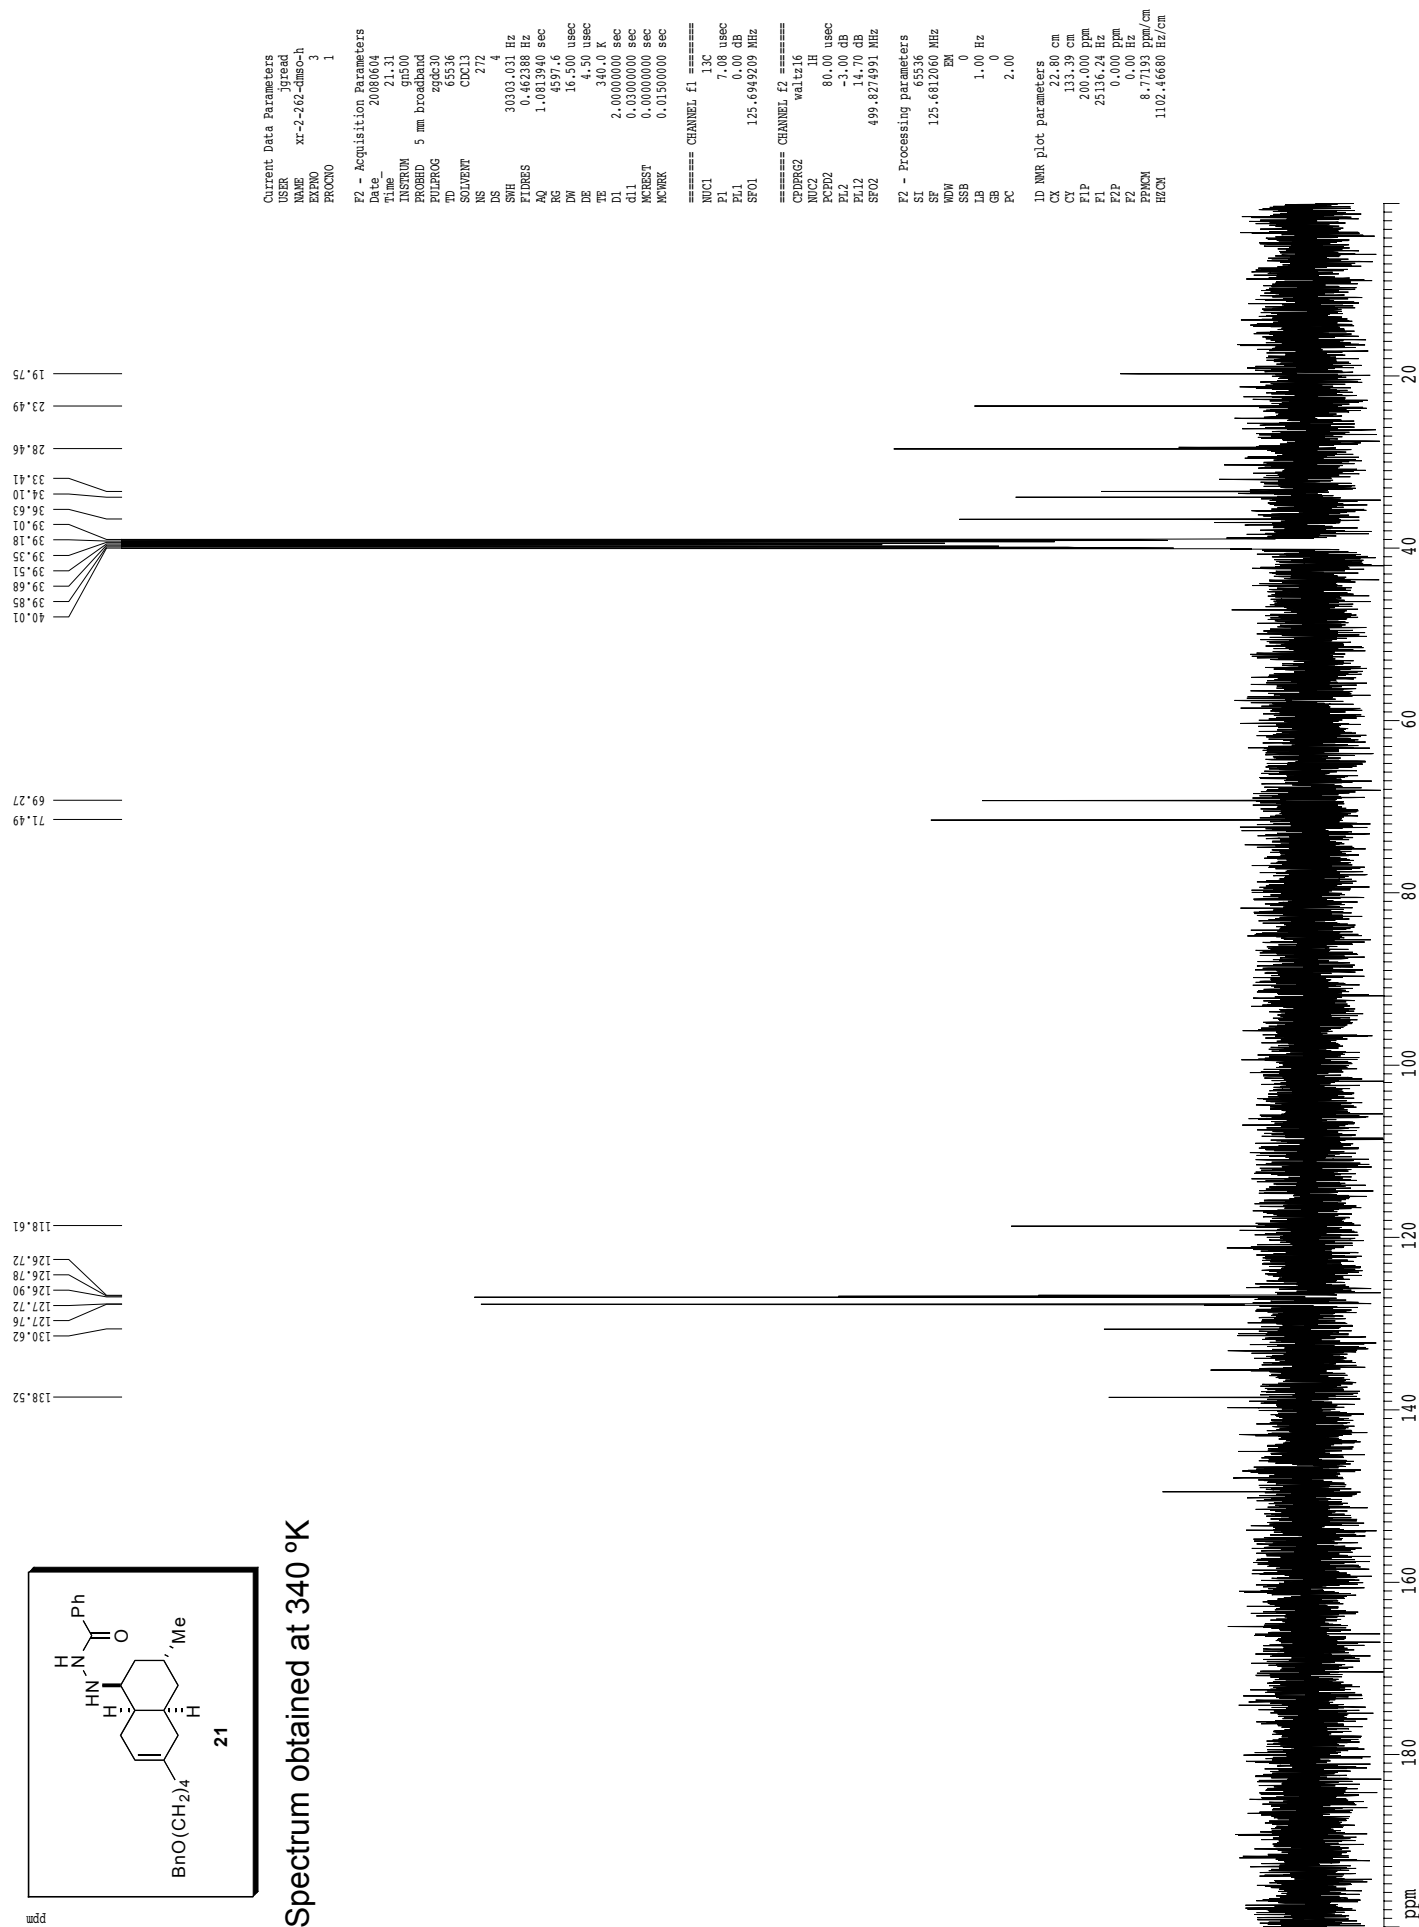



## 1H spectrum

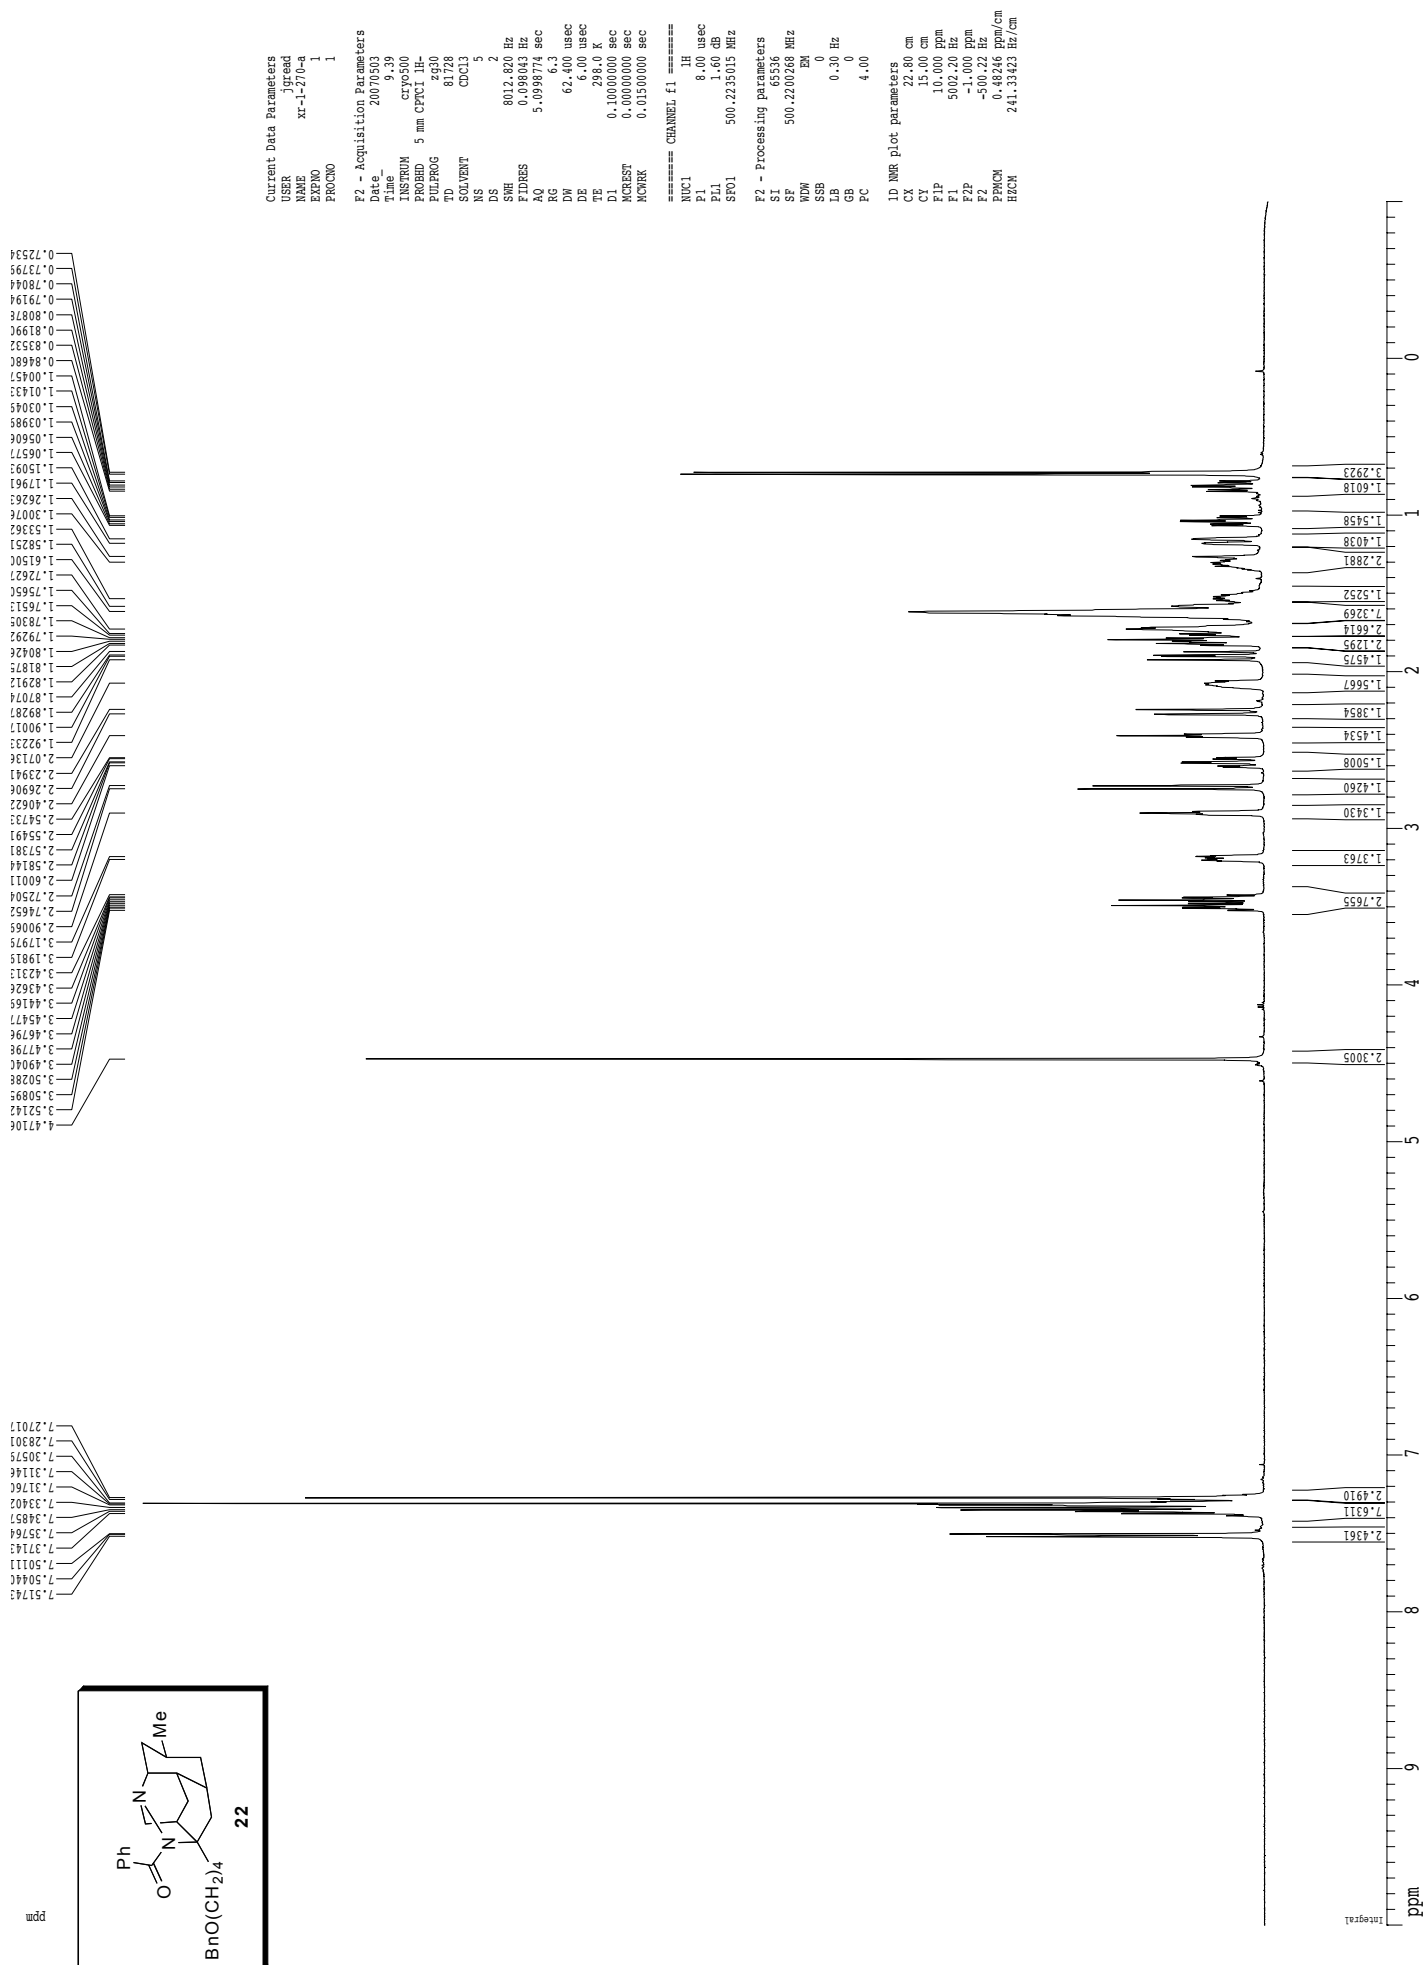

## 13C spectrum with 1H decoupling

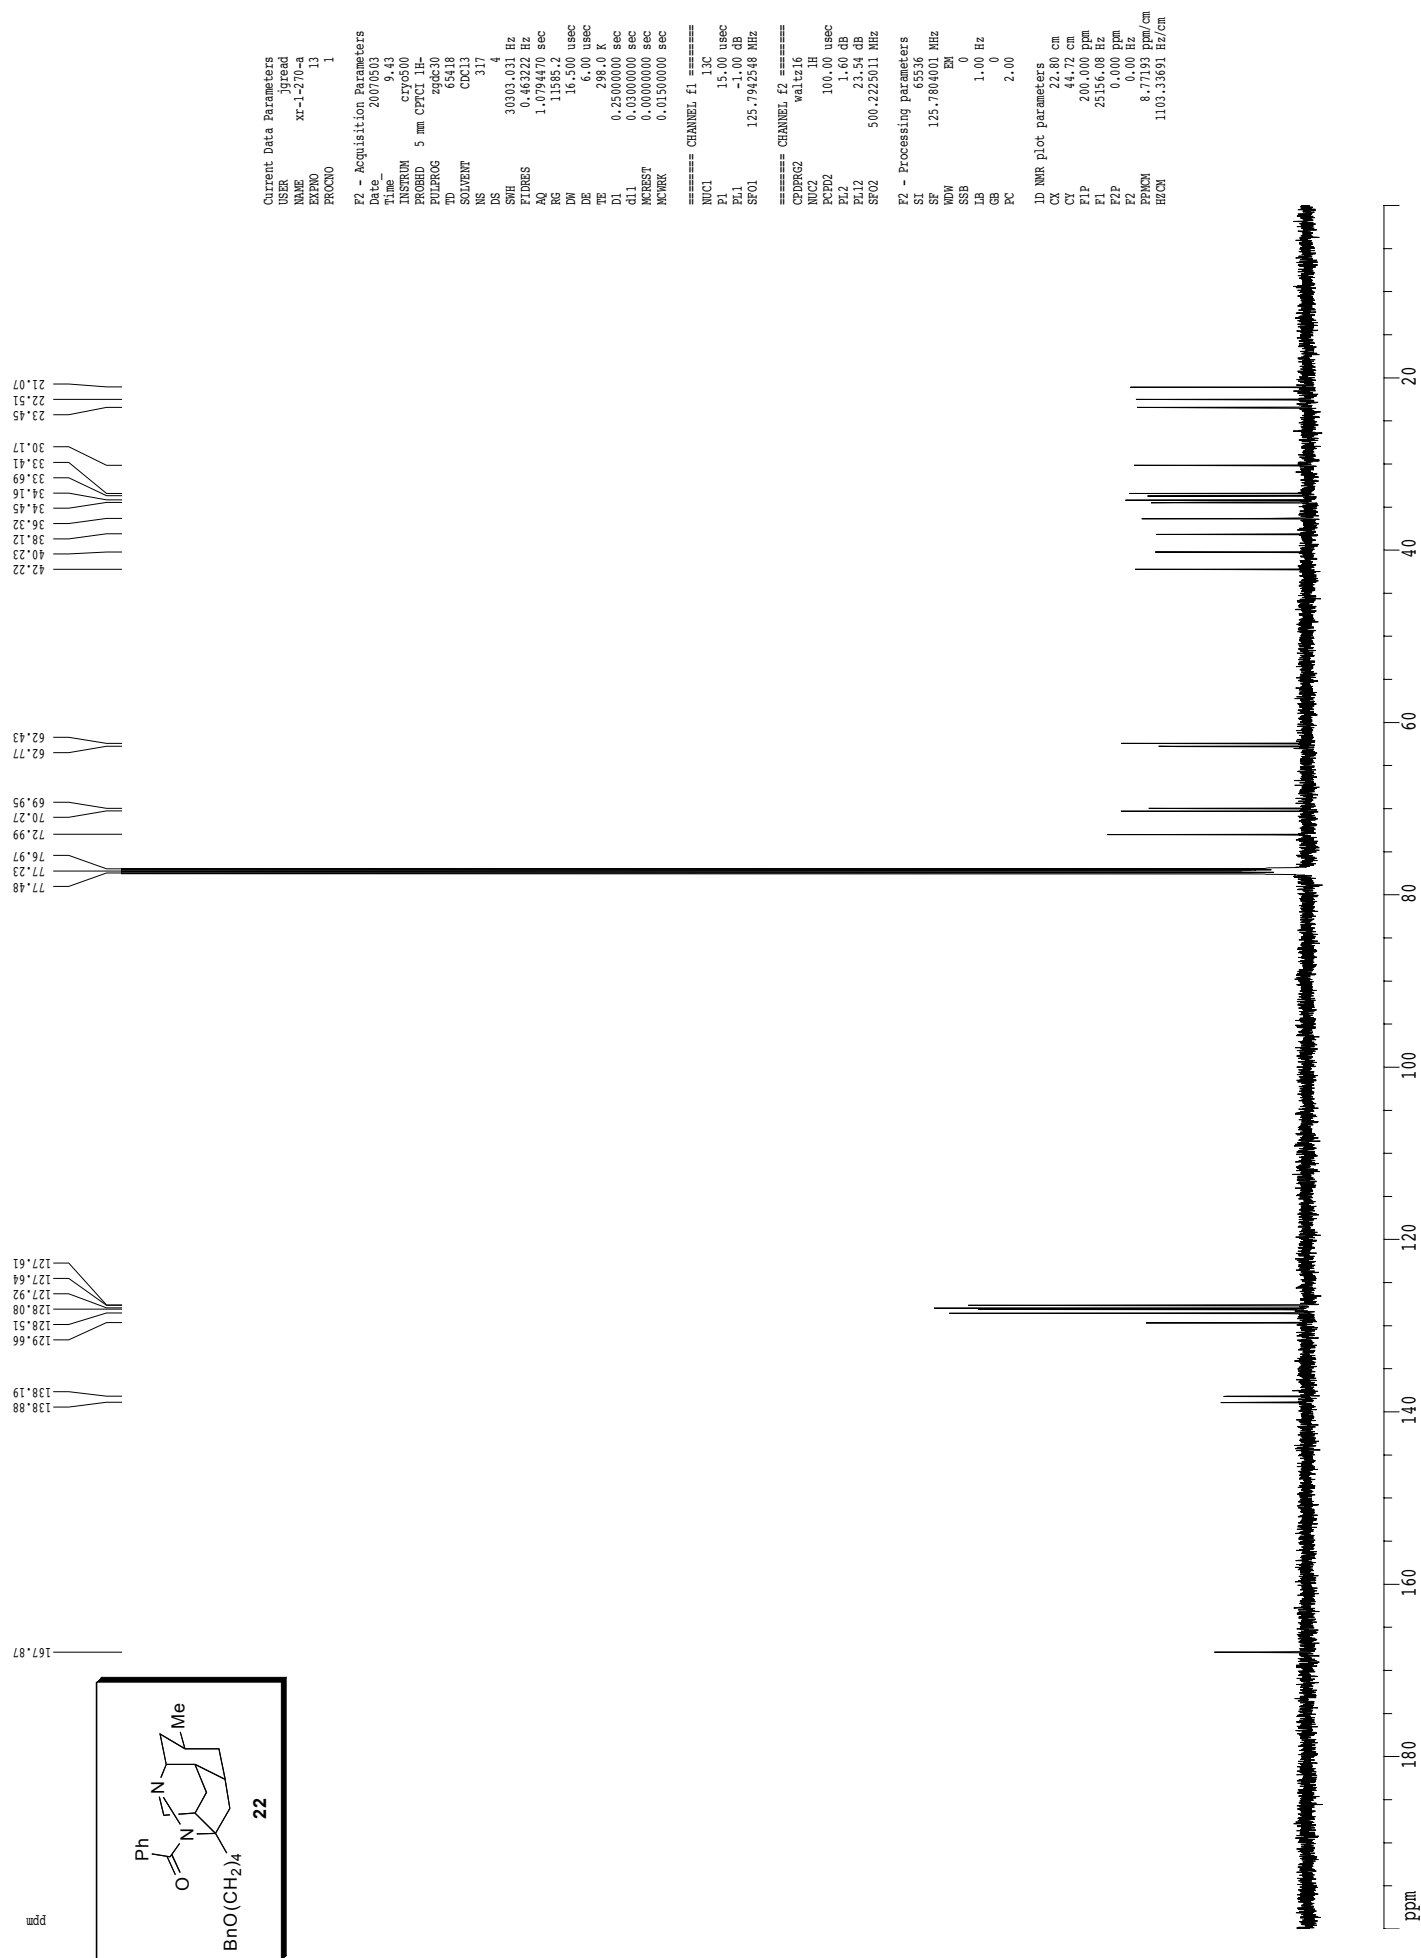

XI-2-208  
1H spectrum

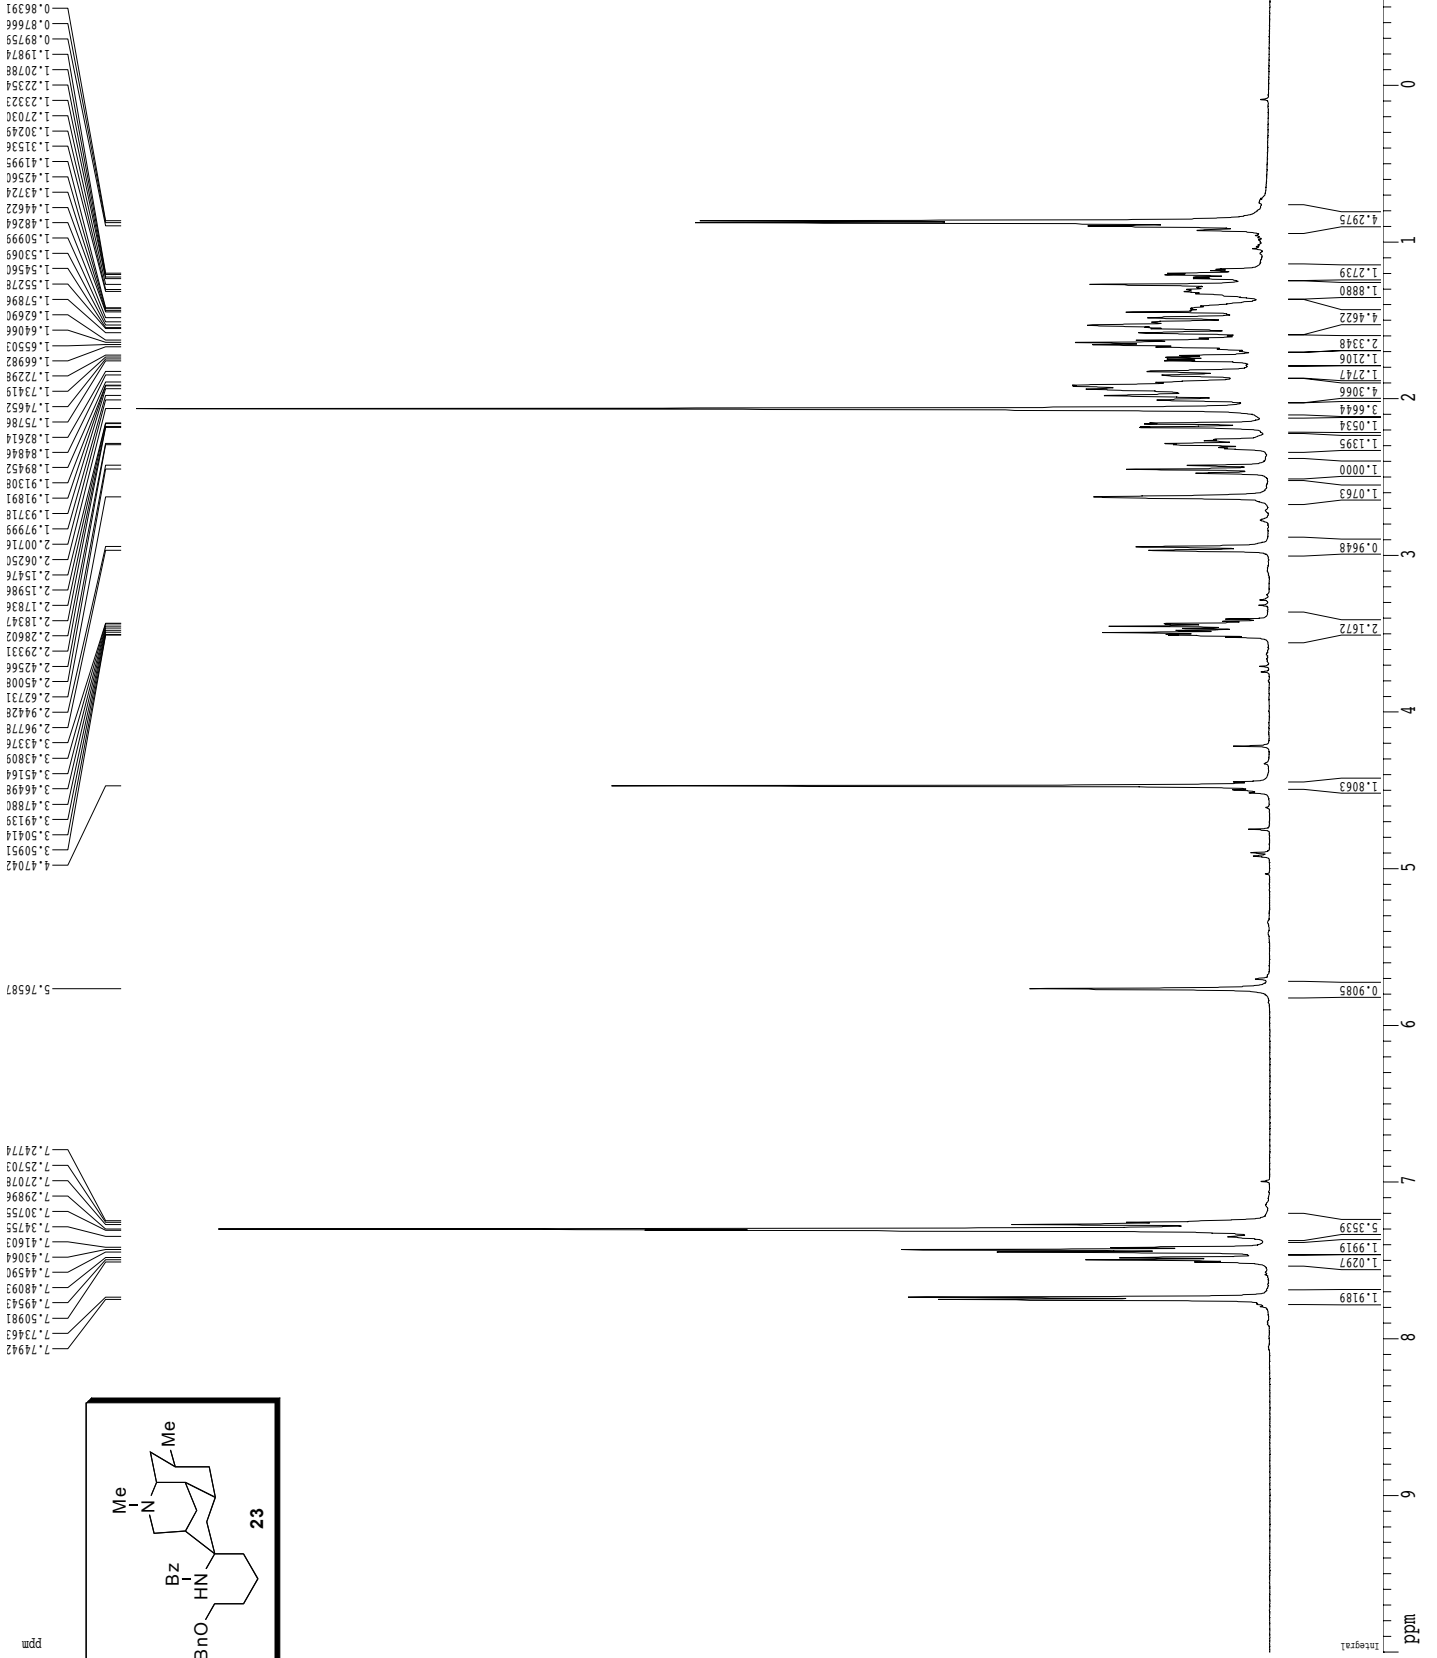

Current Data Parameters  
 USER jgread  
 NAME XI-2-208  
 EXPNO 1  
 PROCNO 1

F2 - Acquisition Parameters  
 Date\_ 20080126  
 Time 11.11  
 INSTRUM crys500  
 PROBRD 5 mm CPACT IH-  
 PULPROG zg30  
 TD 81728  
 SOLVENT CDCl3  
 NS 4  
 DS 2  
 SWH 801.2820 Hz  
 FIDRES 0.098043 Hz  
 AQ 5.0958774 sec  
 RG 4  
 DW 62.60 usec  
 DE 6.00 usec  
 TE 288.0 K  
 D1 0.10000000 sec  
 MCREST 0.00000000 sec  
 MCPRK 0.01500000 sec

===== CHANNEL f1 =====  
 NUC1 1H  
 P1 8.00 usec  
 PL1 1.60 dB  
 SFO1 500.2235015 MHz

F2 - Processing parameters  
 SI 65536  
 SF 500.220252 MHz  
 EQ 0  
 FWHM 0  
 SSB 0  
 LB 0.30 Hz  
 GB 0  
 PC 4.00

1D NMR plot parameters  
 CX 22.80 cm  
 CY 15.00 cm  
 FIP 10.000 ppm  
 F1 5002.20 Hz  
 F2 10.000 ppm  
 FZ -500.92 ppm  
 PRGM 0.48246 ppm/cm  
 HZCM 241.33423 Hz/cm

## 13C spectrum with 1H decoupling

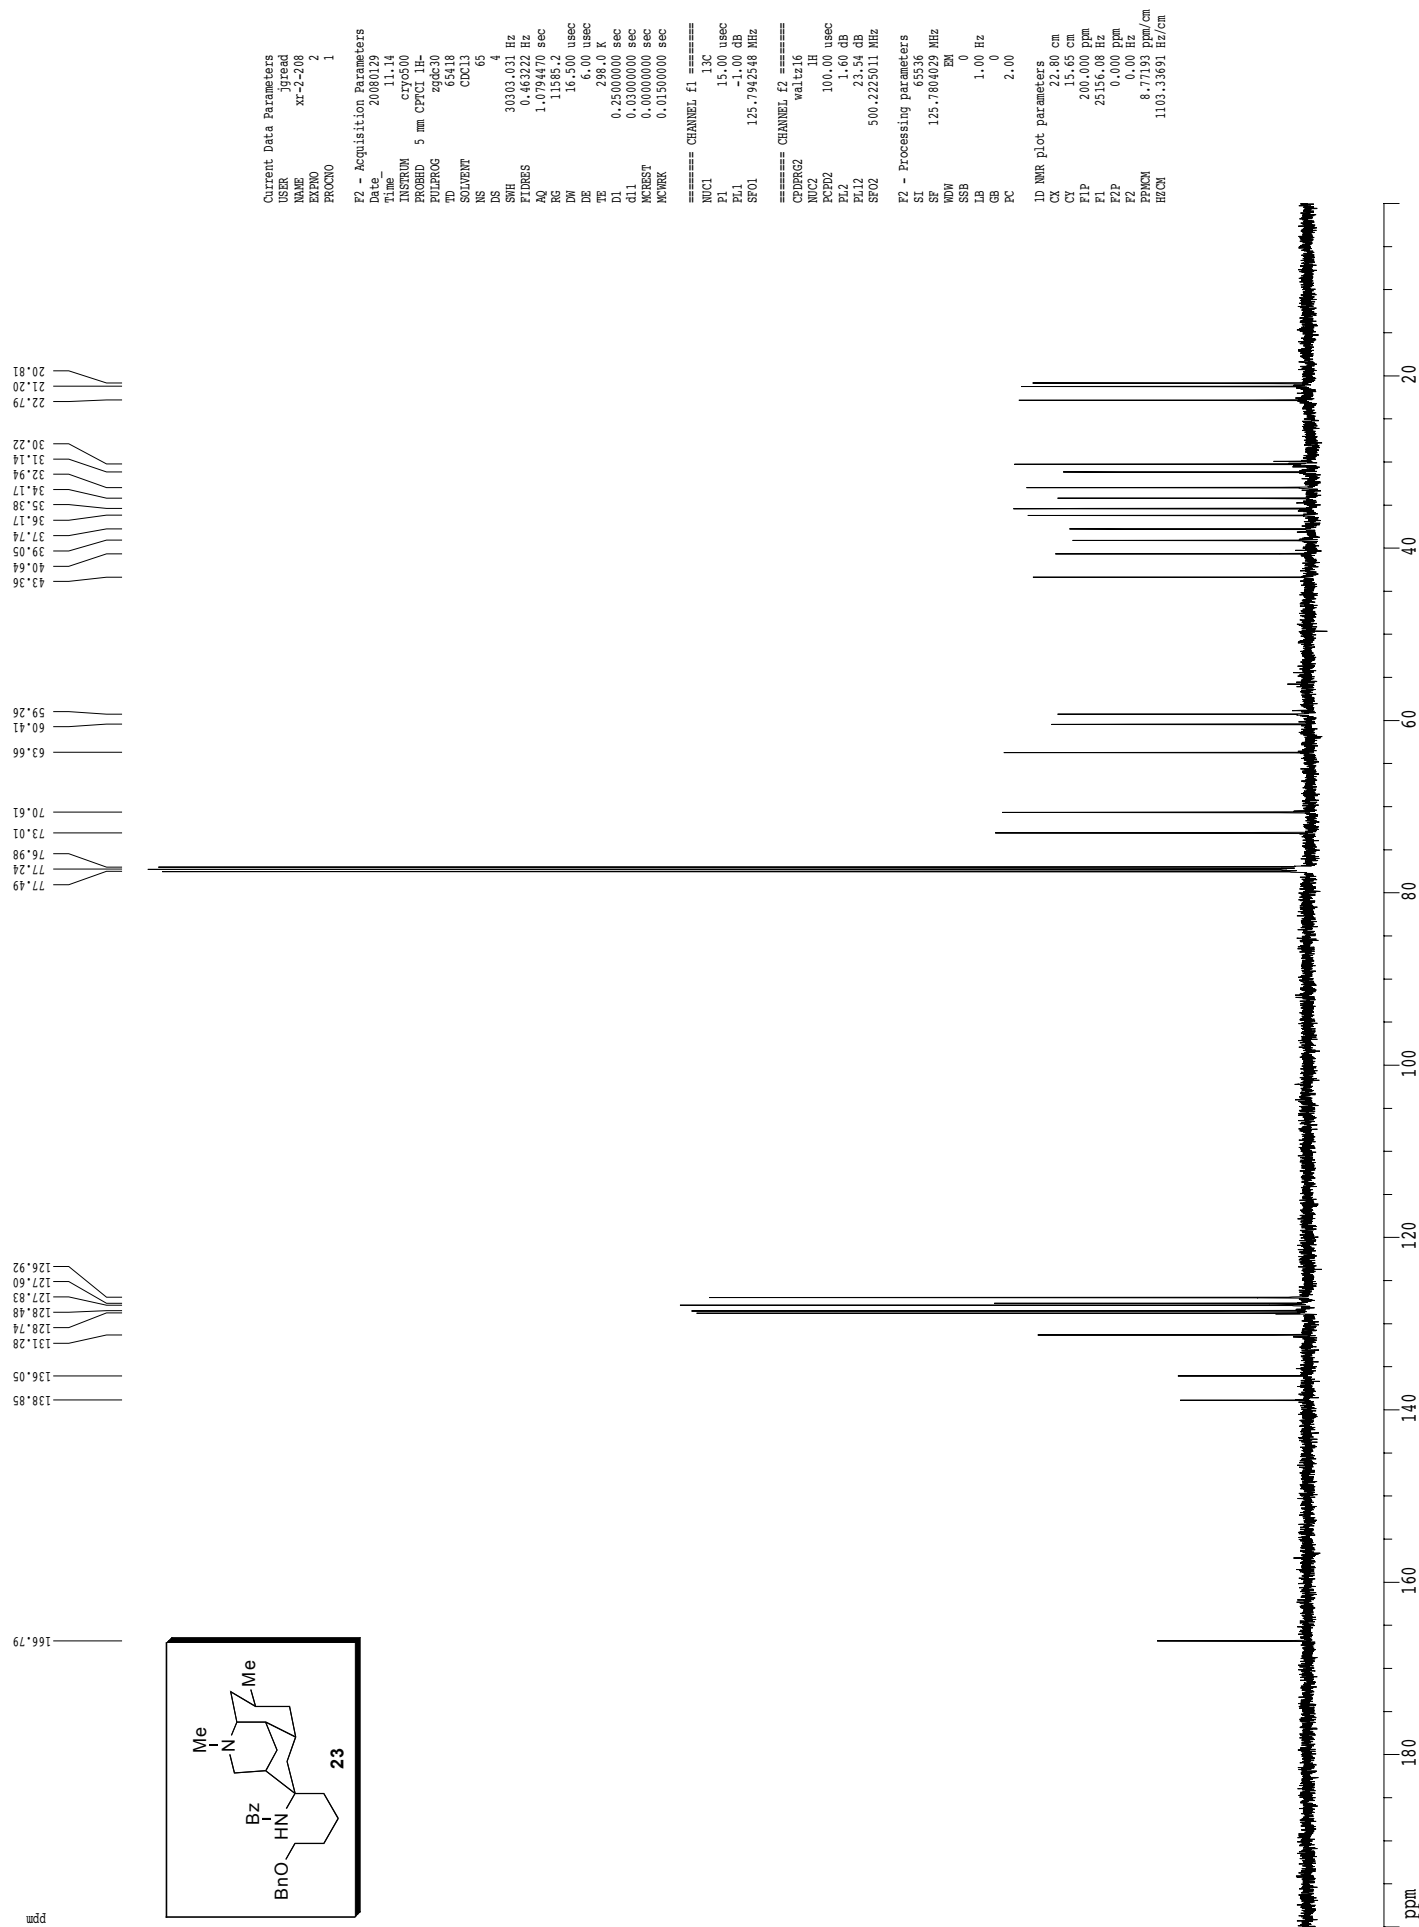

XR-2-211  
white foam  
1H spectrum

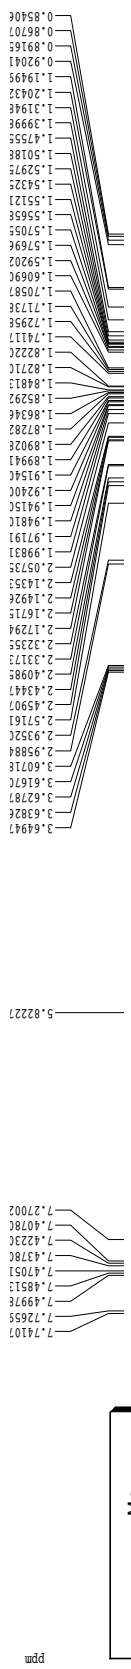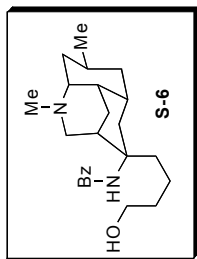

Current Data Parameters  
 USER jread  
 NAME XR-2-211  
 EXPNO 1  
 PROCNO 1  
 F2 - Acquisition Parameters  
 Date\_ 20080130  
 Time\_ 13.05  
 INSTRUM crys500  
 PROBHD 5 mm CPXI 1H-  
 PULPROG zg30  
 TD 81728  
 SOLVENT CDCl3  
 NS 1  
 DS 2  
 SWH 801.2820 Hz  
 FIDRES 0.098043 Hz  
 AQ 5.0950774 sec  
 RG 45  
 DR 62.00 usec  
 DE 288.0 K  
 TE 0.10000000 sec  
 MCREST 0.00000000 sec  
 MCWPK 0.01500000 sec  
 ===== CHANNEL f1 =====  
 NUC1 1H  
 P1 8.00 usec  
 PL1 1.60 dB  
 SFO1 500.2235015 MHz  
 F2 - Processing parameters  
 SI 65536  
 SF 500.220257 MHz  
 DS 4  
 EM 0  
 SSB 0  
 LB 0.30 Hz  
 GB 0  
 PC 4.00  
 1D NMR plot parameters  
 CX 22.80 cm  
 CY 15.00 cm  
 FIP 10.000 ppm  
 F1 5002.20 Hz  
 F2 -500.32 ppm  
 PRGM 0.48246 ppm/cm  
 HZCN 241.33423 Hz/cm

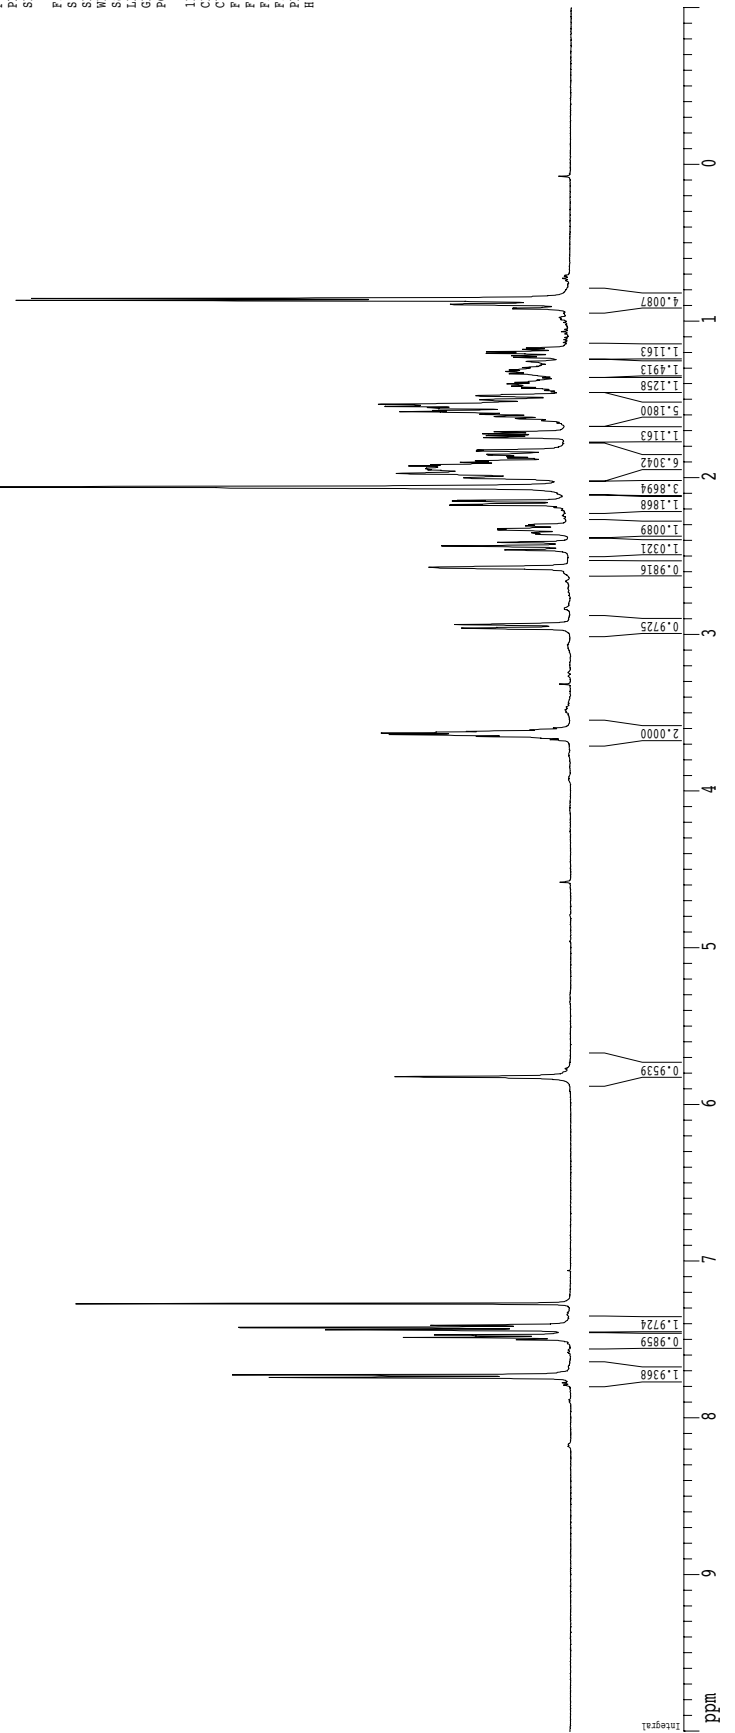

<sup>13</sup>C spectrum with <sup>1</sup>H decoupling

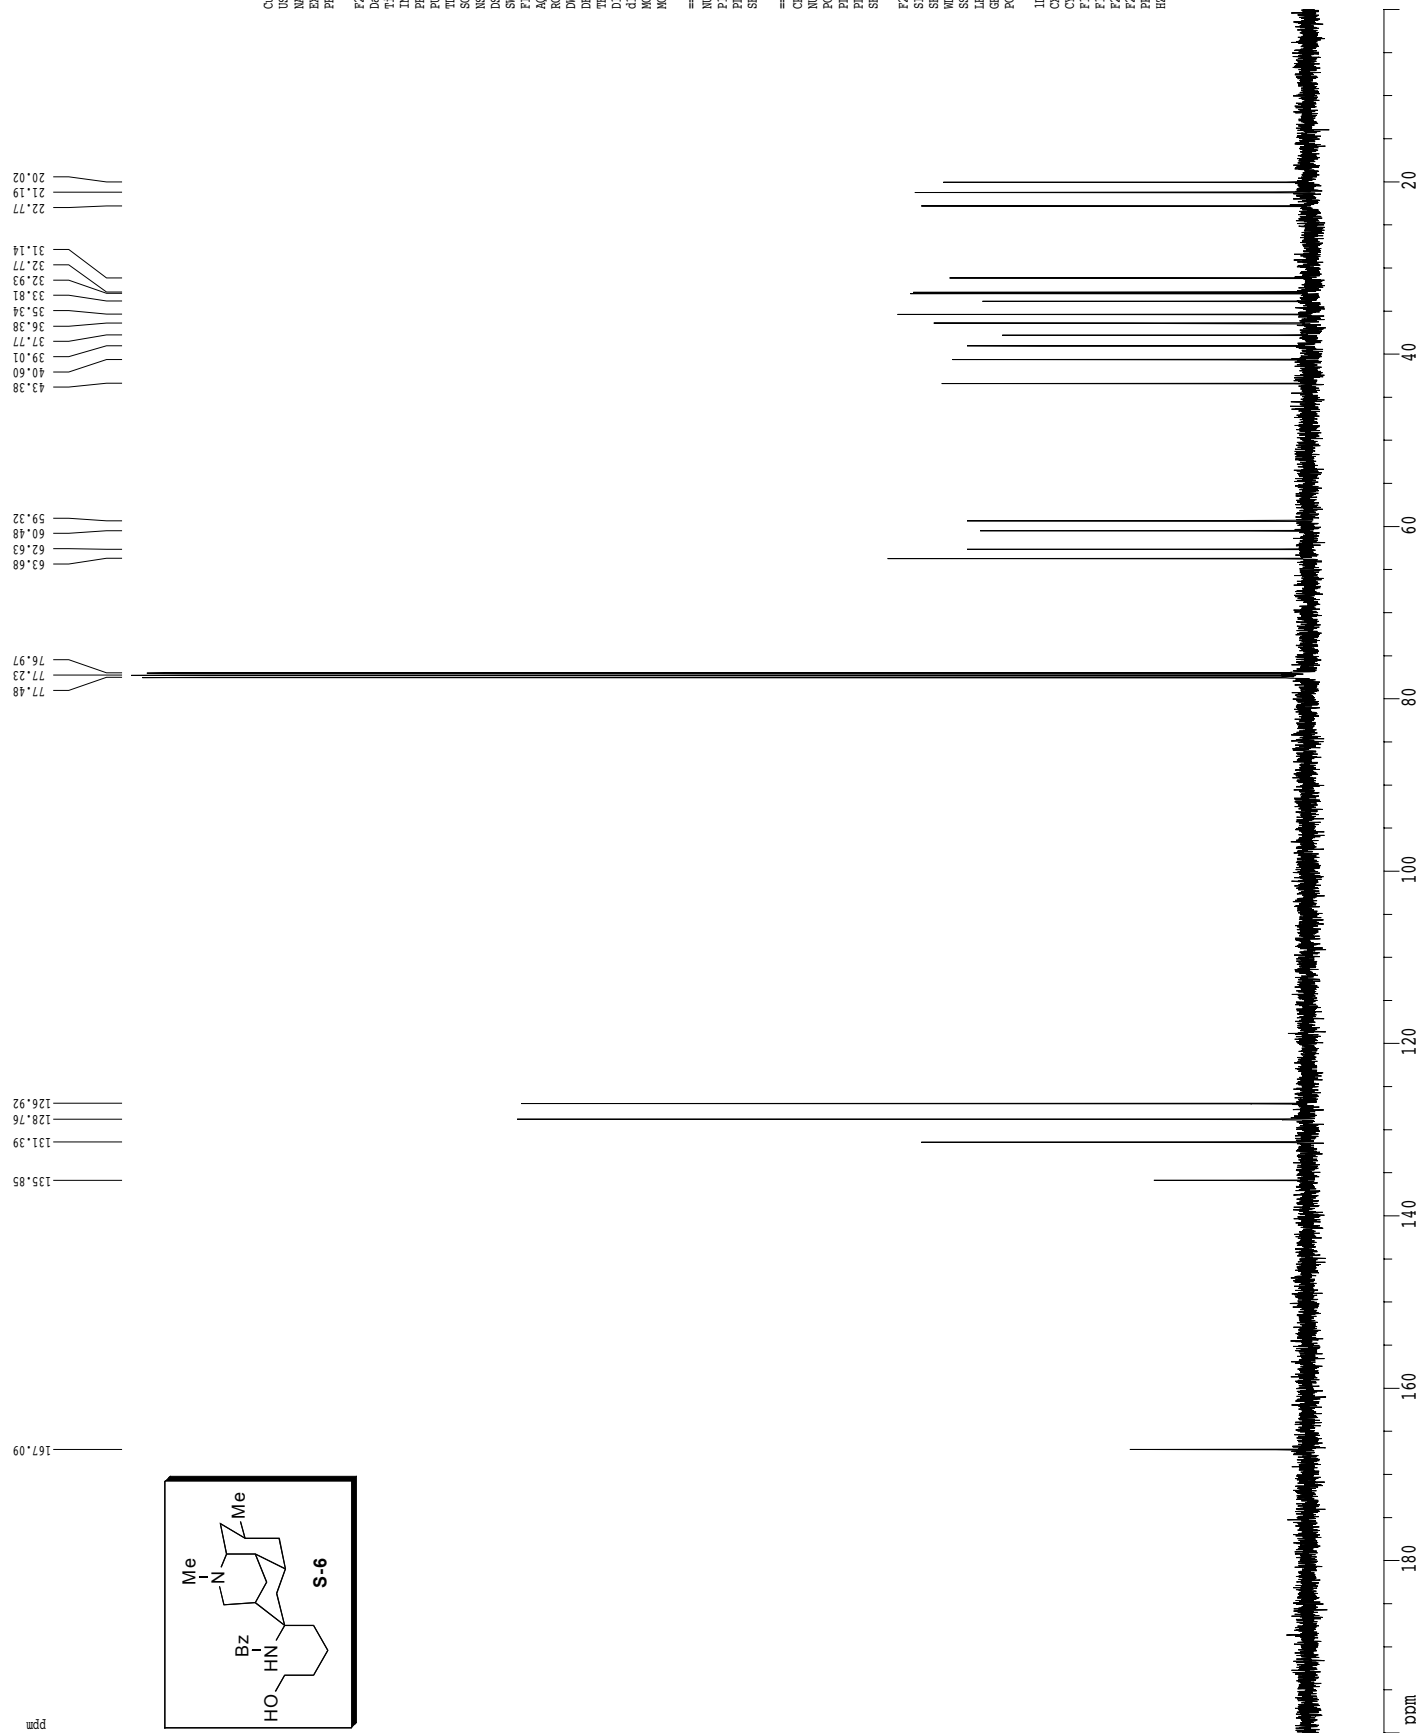

XR-2-216  
20 mg  
1H spectrum

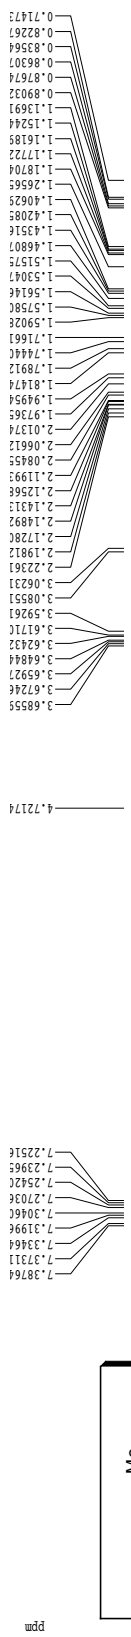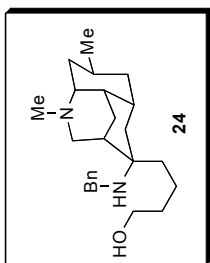

Current Data Parameters  
 USER jread  
 NAME XR-2-216  
 EXPNO 1  
 PROCNO 1  
 F2 - Acquisition Parameters  
 Date\_ 20080206  
 Time\_ 15.07  
 INSTRUM crys500  
 PROBRD 5 mm CPXI 1H-  
 PULPROG zg30  
 TD 81728  
 SOLVENT CDCl3  
 NS 4  
 DS 2  
 SWH 801.2820 Hz  
 FIDRES 0.098043 Hz  
 AQ 5.0958774 sec  
 RG 63  
 DR 62.00 usec  
 DE 288.0 K  
 TE 0.10000000 sec  
 D1 0.10000000 sec  
 MCREST 0.00000000 sec  
 MCWRR 0.01500000 sec  
 ===== CHANNEL f1 =====  
 NUC1 1H  
 P1 8.00 usec  
 PL1 1.60 dB  
 SFO1 500.2235015 MHz  
 F2 - Processing parameters  
 SI 65536  
 SF 500.220257 MHz  
 EQ 1  
 MW 0  
 EN 0  
 SSB 0  
 LB 0.30 Hz  
 GB 0  
 PC 4.00  
 ID NMR plot parameters  
 CX 22.80 cm  
 CY 15.00 cm  
 FIP 10.000 ppm  
 F1 5002.20 Hz  
 F2 -500.32 ppm  
 PRGM 0.48246 ppm/cm  
 HZCM 241.33423 Hz/cm

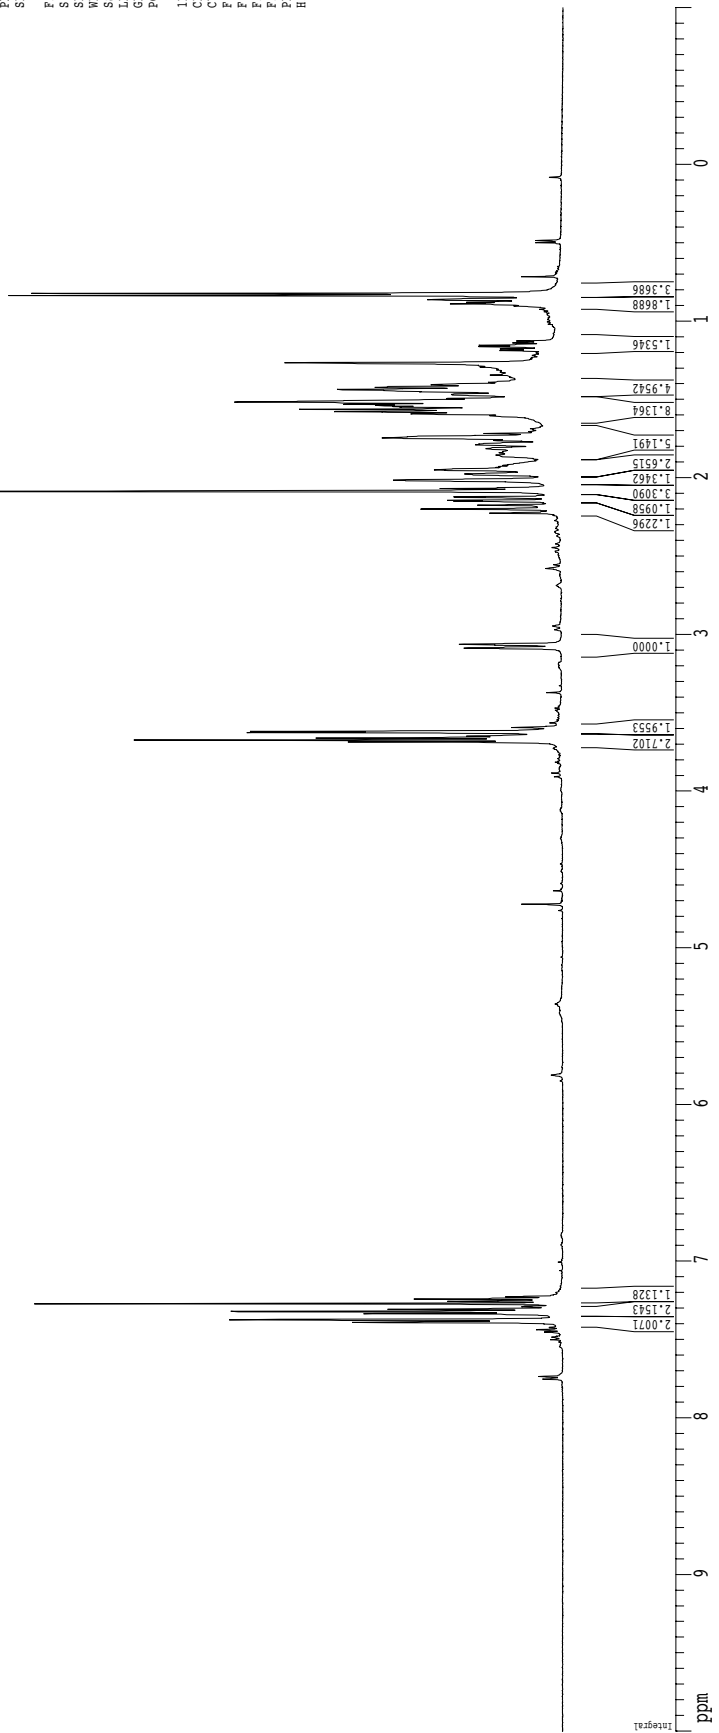

## 13C spectrum with 1H decoupling

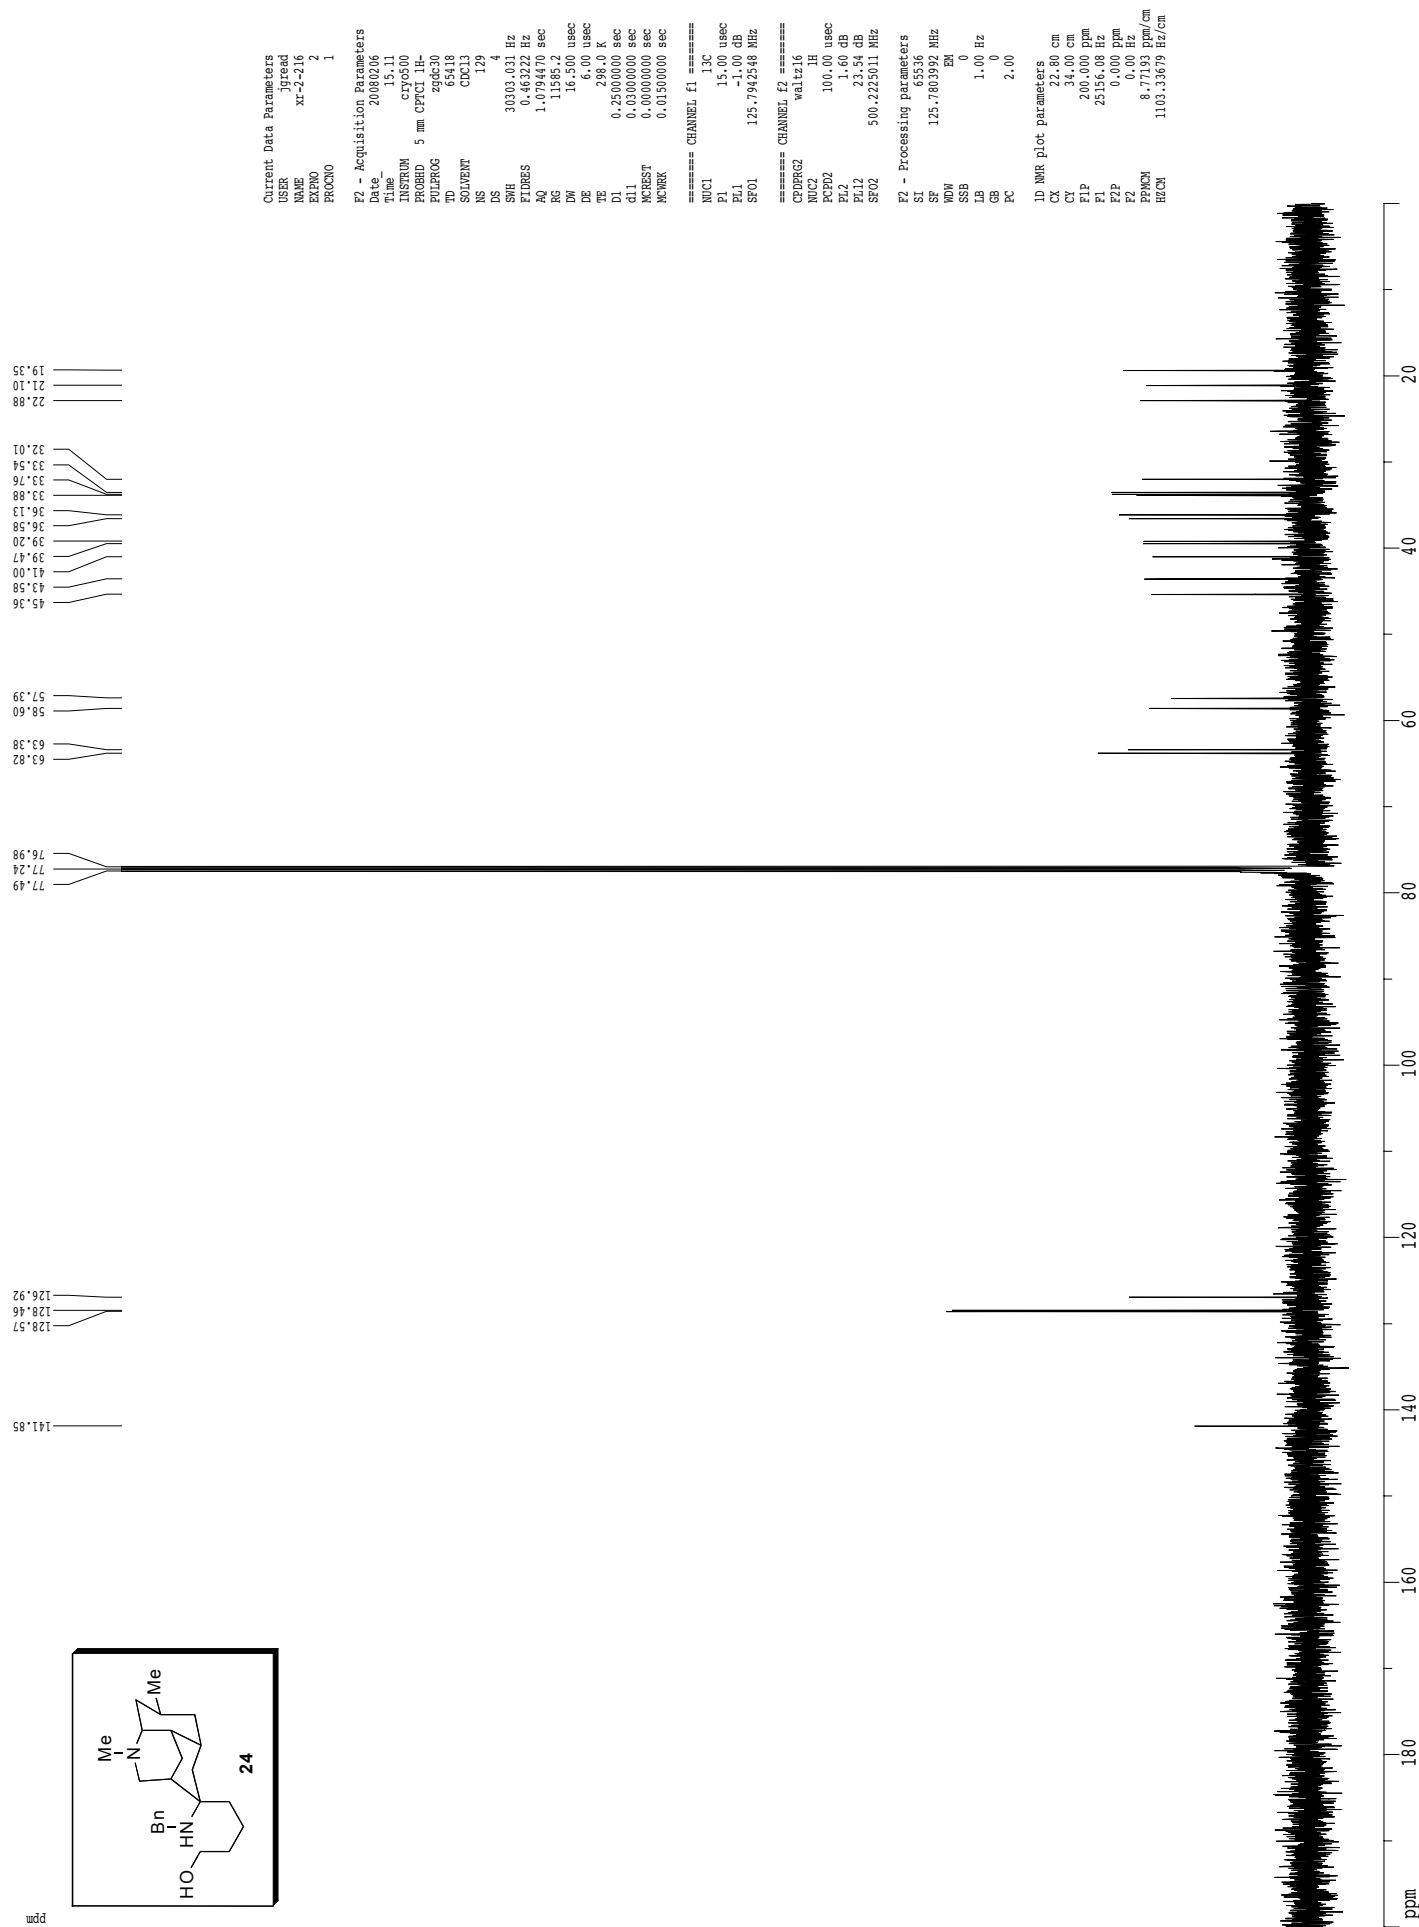



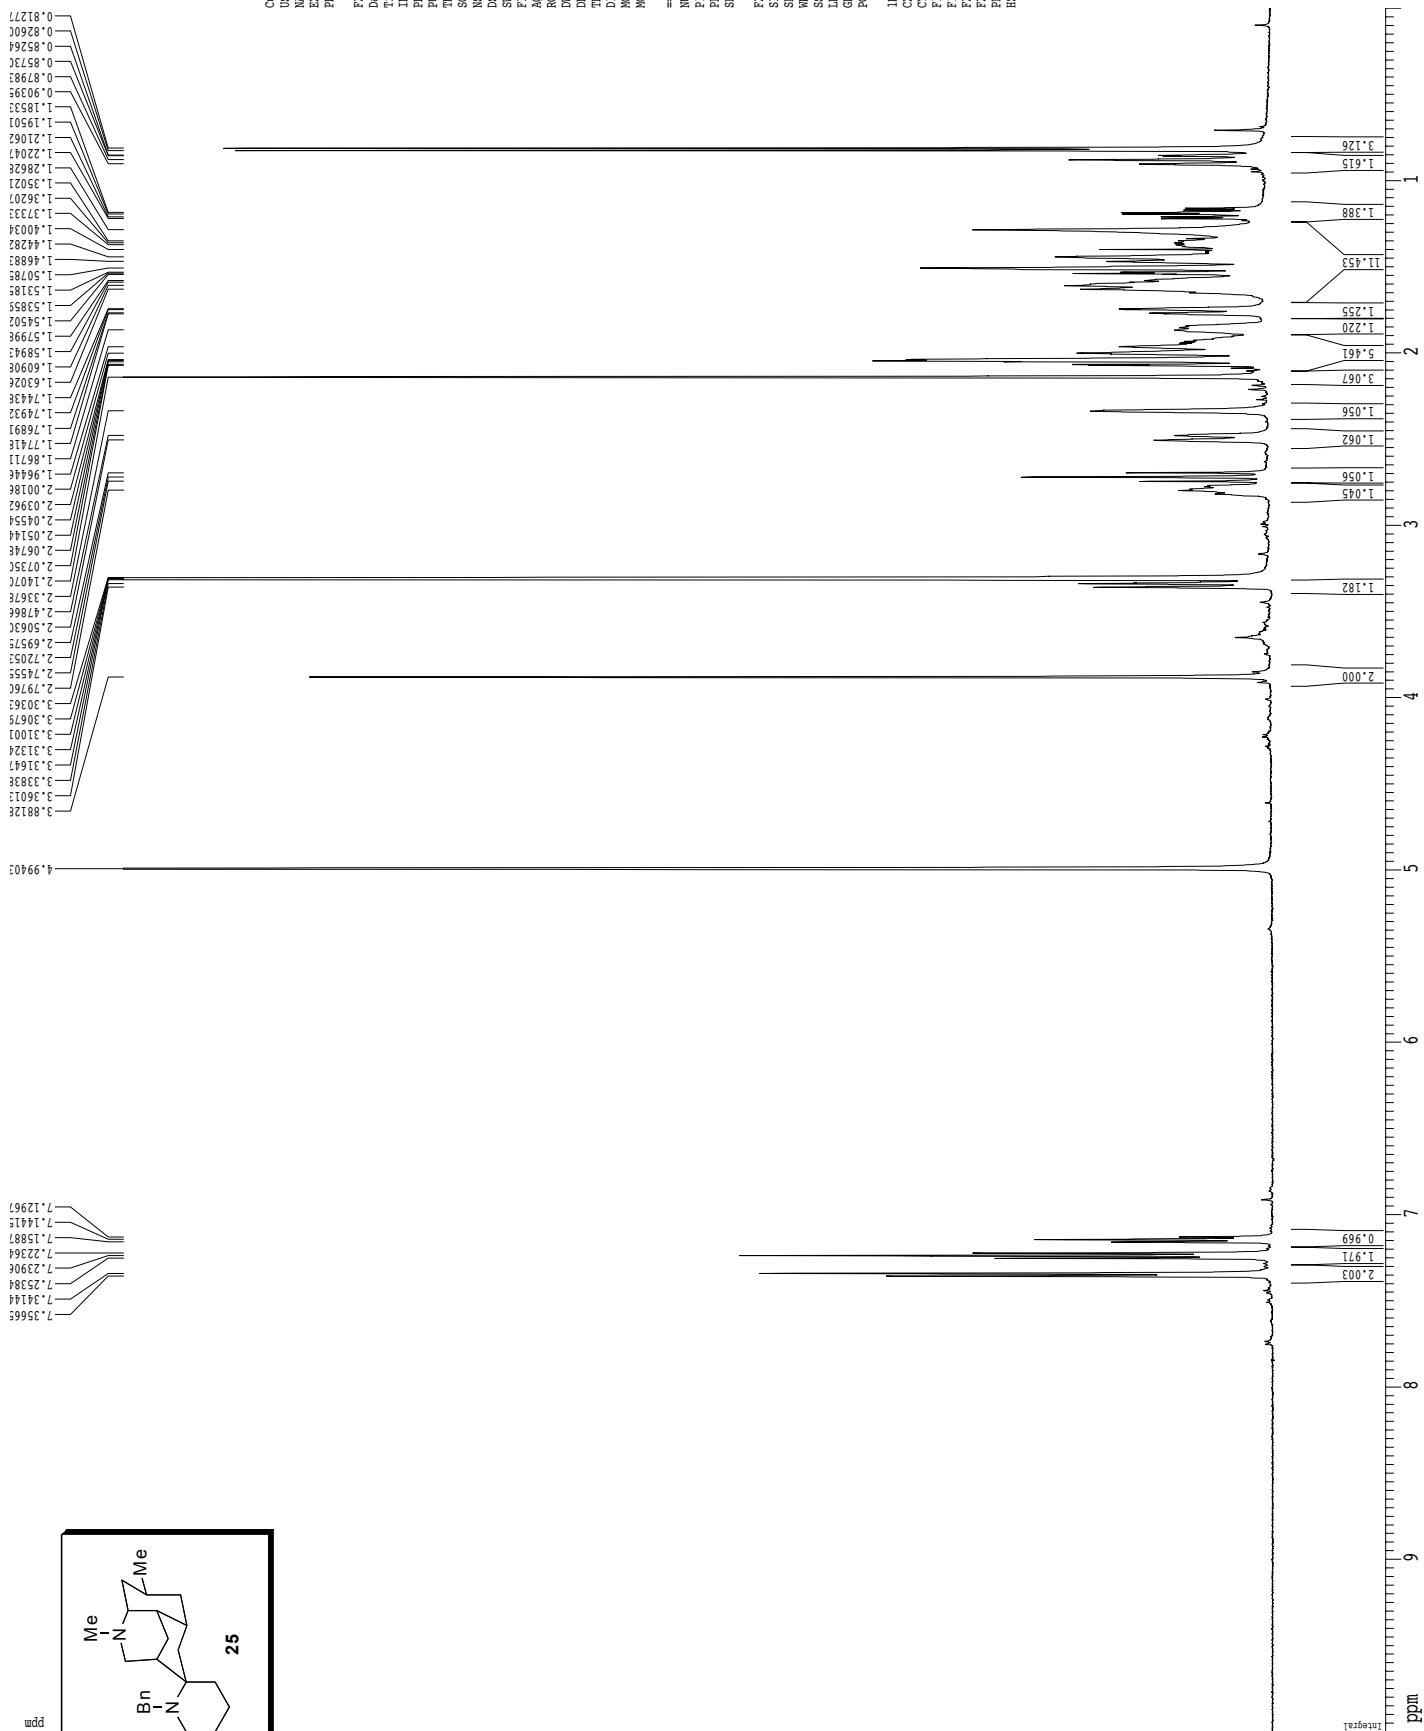

Current Data Parameters  
 USER jgread  
 NAME xr-2-229-hplc  
 EXPNO 1  
 PROCNO 1

F2 - Acquisition Parameters  
 Date\_ 20080220  
 Time 7:23  
 SYSTEM cryo-500  
 PROBHD 5 mm CPYCL  
 PULPROG zgpg30  
 TD 81728  
 SOLVENT CD3OD  
 NS 8  
 DS 2  
 SWH 8012.820 Hz  
 FIDRES 0.098043 Hz  
 AQ 5.0998774 sec  
 RG 11.3  
 DW 62.400 usec  
 DE 6.00 usec  
 TE 285.0 K  
 ACQRES 0.1000000 sec  
 MCRBF 0.1000000 sec  
 MCRBK 0.01500000 sec

==== CHANNEL F1 =====  
 NUC1 1H  
 P1 7.38 usec  
 PL1 1.60 dB  
 SFO1 500.2235015 MHz

F2 - Processing parameters  
 SI 65536  
 SF 500.2201189 MHz  
 GB 0  
 EQ 0  
 AS 0  
 RB 0.30 Hz  
 GB 0  
 PC 4.00

ID NMR plot parameters  
 CX 22.80 cm  
 CY 74.83 cm  
 FIP 10.000 ppm  
 F1 5002.20 Hz  
 F2 0.000 ppm  
 FZ 0.00 Hz  
 PPGMH 0.43860 ppm/cm  
 HCN 219.39476 Hz/cm

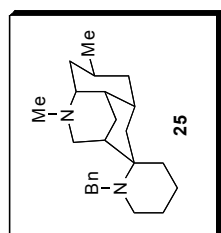

ppm

13C spectrum with 1H decoupling

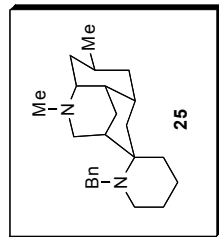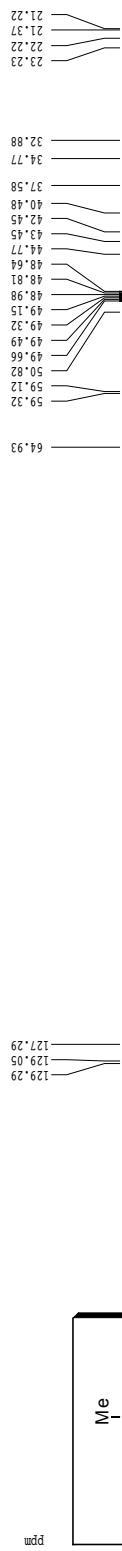

Current Data Parameters  
 USER jgread  
 NAME xr-2-29-1p1c  
 EXPNO 2  
 PROCNO 1

F2 - Acquisition Parameters  
 Date\_ 20080220  
 Time 7.28  
 INSTRUM cryo500  
 PROBED 5 mm CPCLH-  
 PULPROG zgpg30  
 SOLVENT CDCl3  
 NS 513  
 DS 4  
 SWH 30303.031 Hz  
 FIDRES 0.463222 Hz  
 AQ 1.0794470 sec  
 RG 10321.3  
 DW 16.500 usec  
 DE 6.00 usec  
 TE 298.0 K  
 D1 0.25000000 sec  
 d11 0.03000000 sec  
 MCREST 0.00000000 sec  
 MCPRK 0.01500000 sec

===== CHANNEL f1 =====  
 NUC1 13C  
 P1 14.75 usec  
 PL1 -0.00 dB  
 SFO1 125.7942548 MHz

===== CHANNEL f2 =====  
 CPDPRG2 waltz16  
 NUC2 1H  
 PCPD2 100.00 usec  
 PL2 1.60 dB  
 PL12 24.80 dB  
 SFO2 500.2225011 MHz

F2 - Processing parameters  
 SI 65536  
 SF 125.7802251 MHz  
 WDW EM  
 EN 0  
 LB 1.00 Hz  
 GB 0  
 PC 2.00

ID NMR plot parameters  
 CX 22.80 cm  
 CY 130.52 cm  
 F1P 180.000 ppm  
 F1 22640.44 Hz  
 F2P 0.000 ppm  
 F2 0.00 Hz  
 PPMCH 7.89474 ppm/cm  
 HZCH 993.00183 Hz/cm

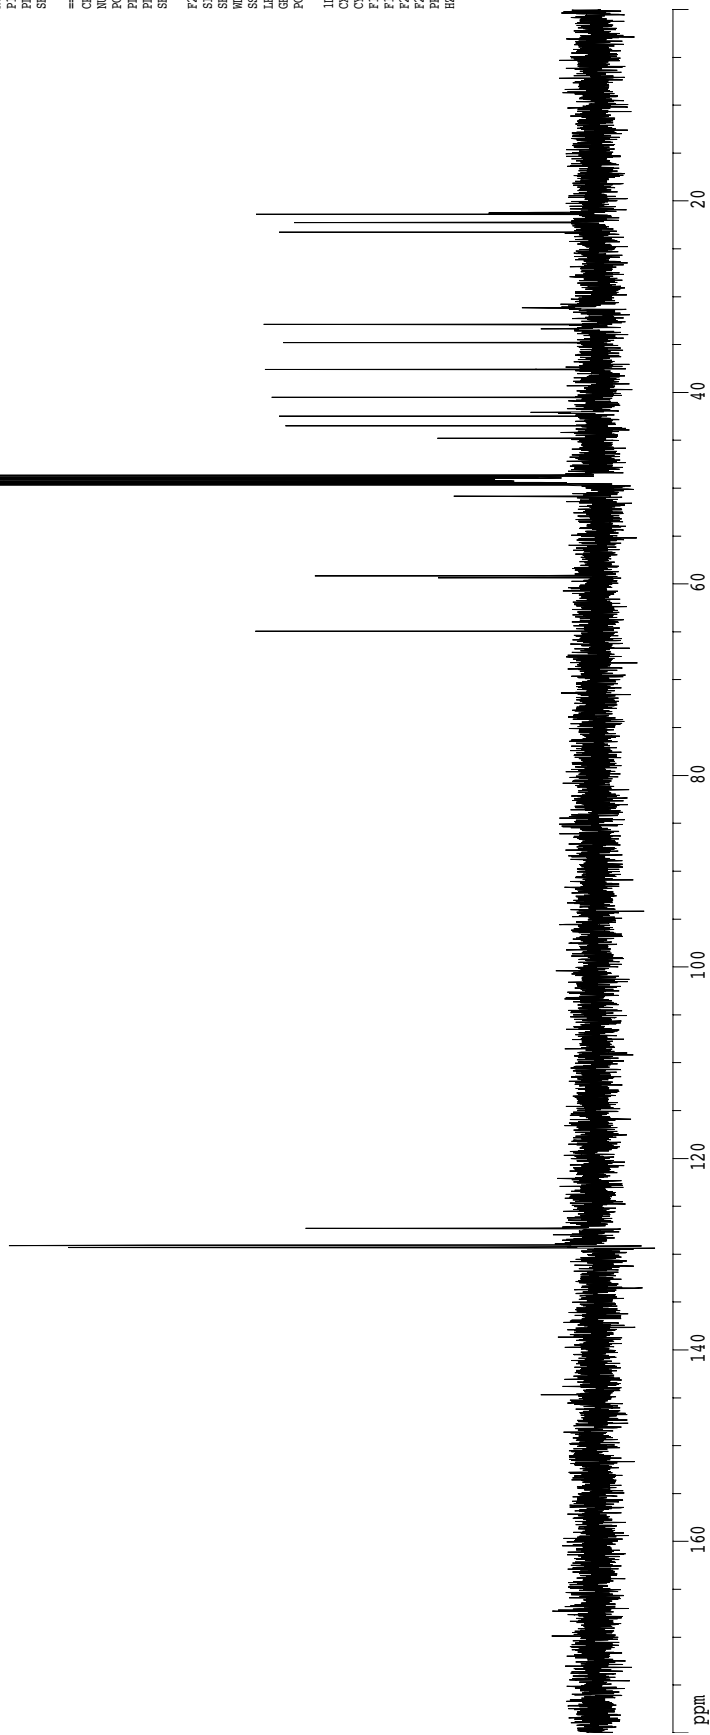

DS 2  
 SWH 8012.820 Hz  
 FIDRES 0.098043 Hz  
 AQ 5.0959174 sec  
 DS 62.400 usec  
 DE 6.00 usec  
 TE 298.0 K  
 D1 0.10000000 sec  
 MCREST 0.00000000 sec  
 MCHWK 0.01500000 sec  
 ===== CHANNEL F1 =====  
 NUC1 1H  
 P1 7.38 usec  
 PL1 1.60 dB  
 SFO1 500.223015 MHz  
 F2 - Processing Parameters  
 SI 65536  
 SF 500.2200183 MHz  
 MDW EM  
 SSB 0  
 LB 0.30 Hz  
 GB 0  
 PC 4.00  
 ID NMR plot parameters  
 CX 22.80 cm  
 CI 15.00 cm  
 F1 8.500 ppm  
 F2 115.00 Hz  
 F3 0.00 ppm  
 F4 0.00 Hz  
 PRCM 0.15351 ppm/cm  
 HZCM 76.78816 Hz/cm

XI-Z-/b-a  
 stack  
 1H spectrum

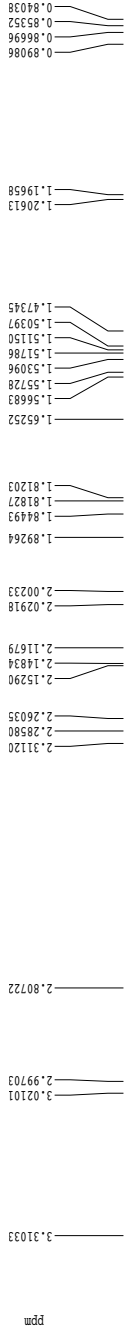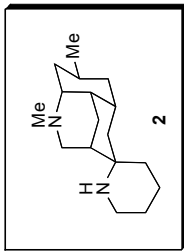

Free Base

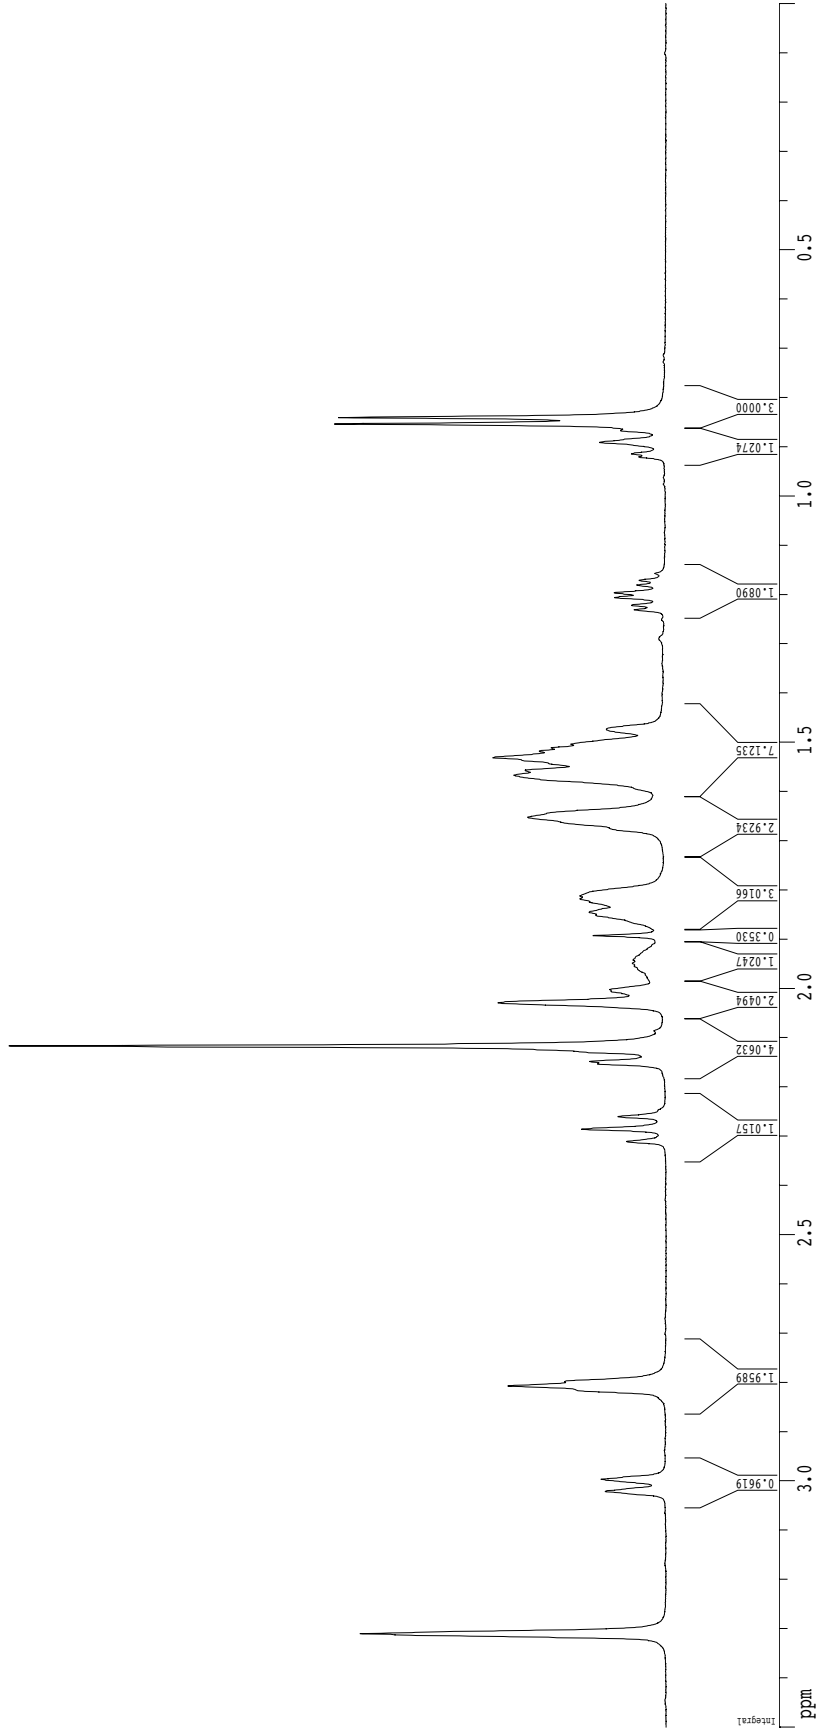

## 13C spectrum with 1H decoupling

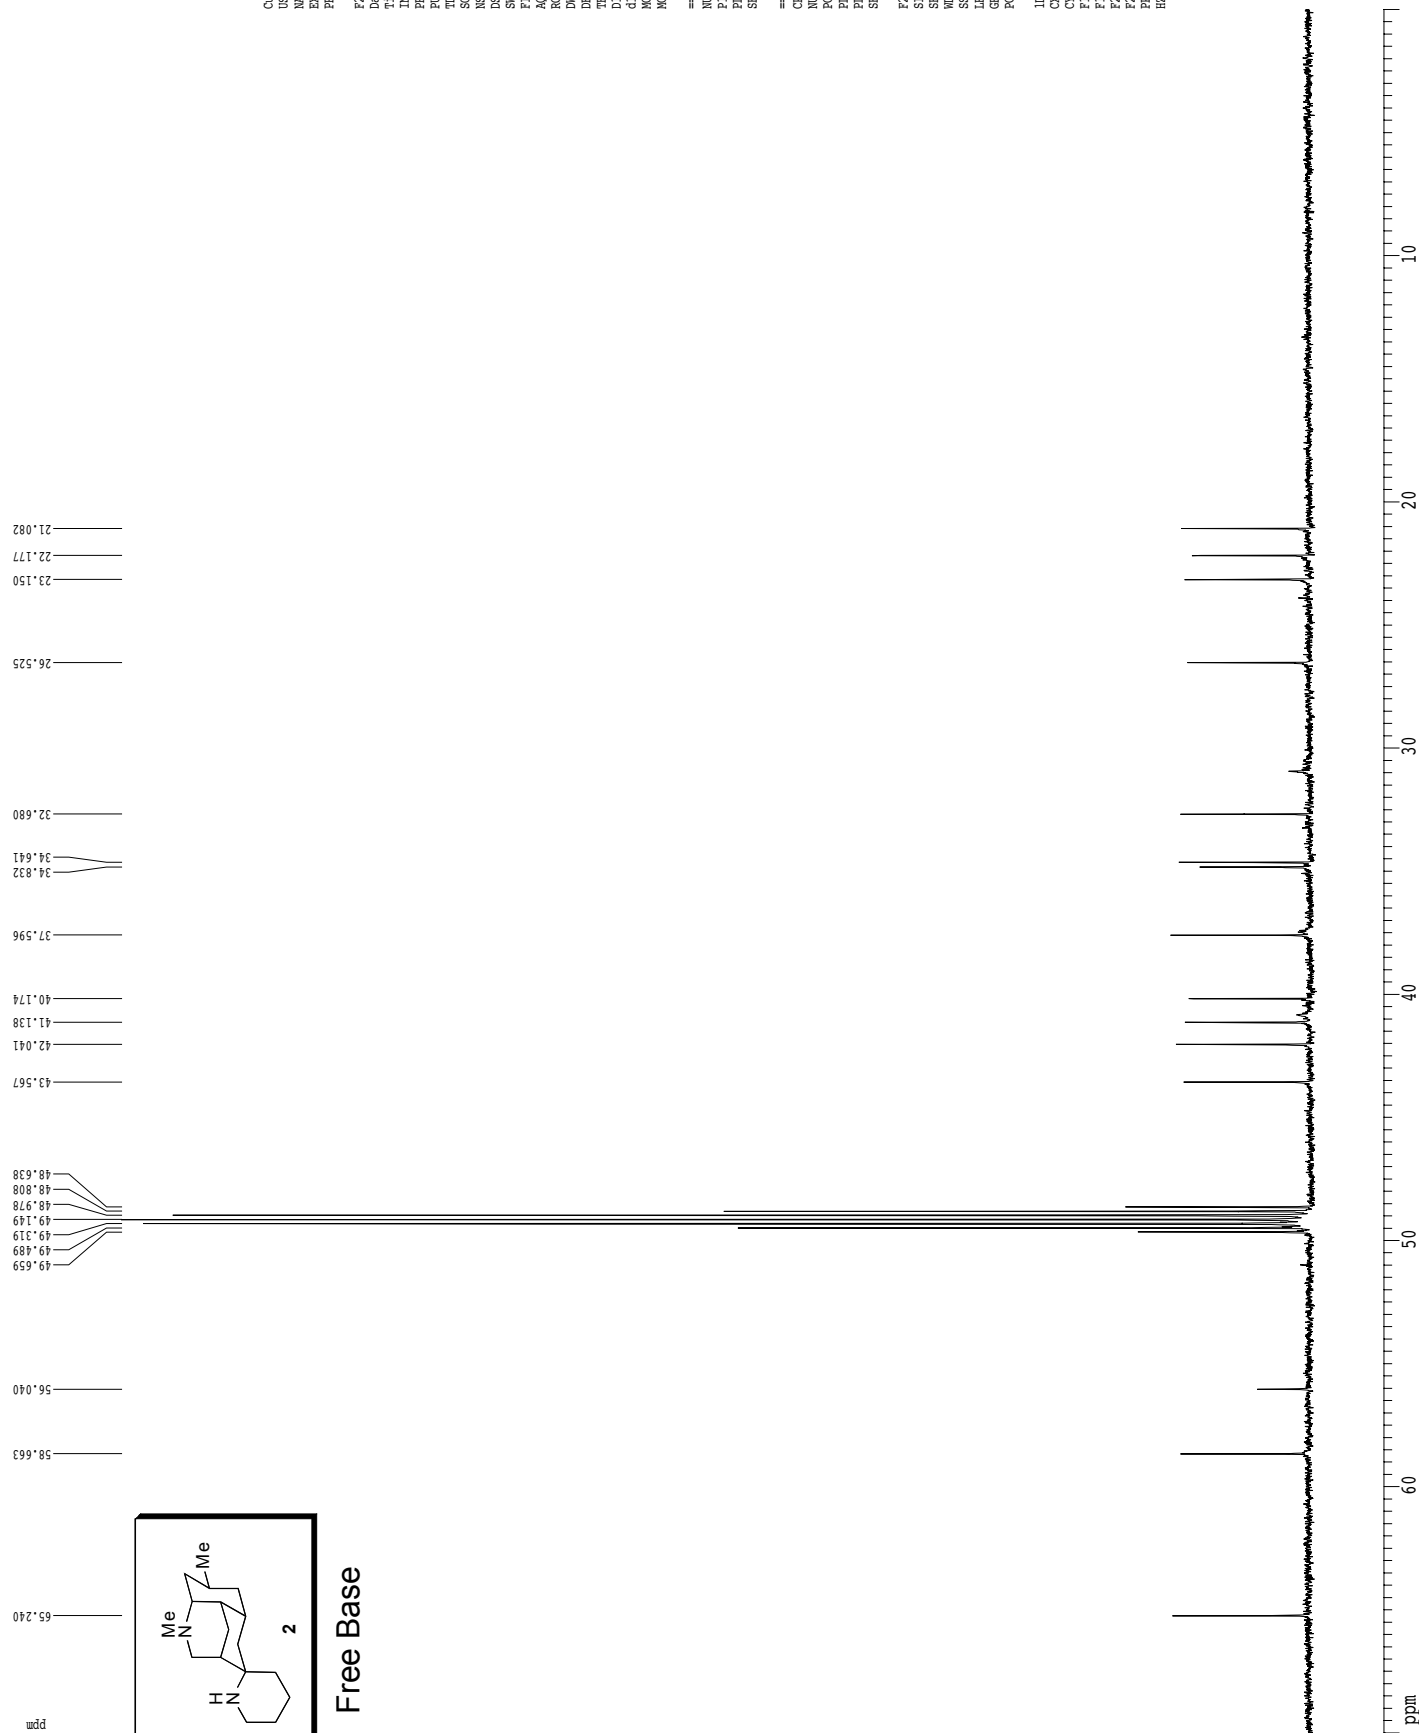

```

Current Data Parameters
USER          jgread
NAME         XT-2-233-2Da
EXPNO        2
PROCNO       1

F2 - Acquisition Parameters
Date_        20080227
Time         8.07
INSTRUM      cryo500
PROBHD       5 mm CPCL1H-
PULPROG      zgpg30
RG           654.8
SOLVENT      CDCl3
NS           59
DS           4
SWH          30303.031 Hz
FIDRES       0.463222 Hz
AQ           1.0794470 sec
RG           10321.3
DW           16.500 usec
DE           6.00 usec
TE           298.0 K
D1           0.25000000 sec
d11          0.03000000 sec
MCREST       0.00000000 sec
MCPRK        0.01500000 sec

===== CHANNEL f1 =====
NUC1          13C
P1           14.75 usec
PL1          -1.00 dB
SFO1         125.7942548 MHz

===== CHANNEL f2 =====
CPDPRG2      walz16
NUC2          1H
PCPD2        100.00 usec
PL2          1.60 dB
PL12         24.80 dB
SFO2         500.2225011 MHz

F2 - Processing parameters
SI           65536
SF           125.7802270 MHz
WDW          EM
SSB          0
LB           1.00 Hz
GB           0
PC           2.00

ID NMR plot parameters
CX           22.80 cm
CY           17.61 cm
F1P          70.000 ppm
F1           8804.62 Hz
F2P          0.000 ppm
F2           0.00 Hz
PFMCH        3.07018 ppm/cm
HZCN         386.16739 Hz/cm

```

XI-2-7-74  
crude rxn  
1H spectrum

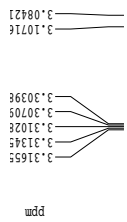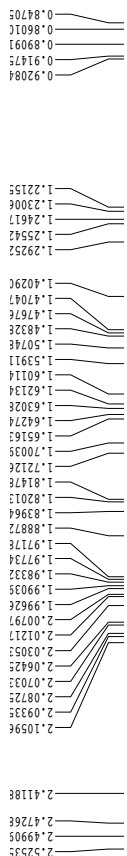

Current Data Parameters  
 USER jread  
 NAME XI-2-295  
 EXPNO 1  
 PROCNO 1  
 F2 - Acquisition Parameters  
 Date\_ 20080606  
 Time 21.03  
 INSTRUM crys500  
 PROBRD 5 mm CPXI 1H-  
 PULPROG zg30  
 TD 81728  
 SOLVENT CD300T  
 NS 8  
 DS 2  
 SWH 8012.820 Hz  
 FIDRES 0.098043 Hz  
 AQ 5.0998774 sec  
 RG 62.40 usec  
 DR 6.00 usec  
 TE 288.0 K  
 D1 0.10000000 sec  
 MCREST 0.00000000 sec  
 MCPRK 0.01500000 sec  
 ===== CHANNEL f1 =====  
 NUC1 1H  
 P1 7.38 usec  
 PL1 1.60 dB  
 SFO1 500.2235015 MHz  
 F2 - Processing parameters  
 SI 65536  
 SF 500.220188 MHz  
 WDW EM  
 SSB 0  
 LB 0.30 Hz  
 GB 0  
 PC 4.00  
 ID NMR plot parameters  
 CX 22.80 cm  
 CY 15.00 cm  
 FIP 3.500 ppm  
 F1 1750.77 Hz  
 F2 0.000 ppm  
 F3 0.000 ppm  
 PRMQM 0.15351 ppm/cm  
 HZCM 76.78836 Hz/cm

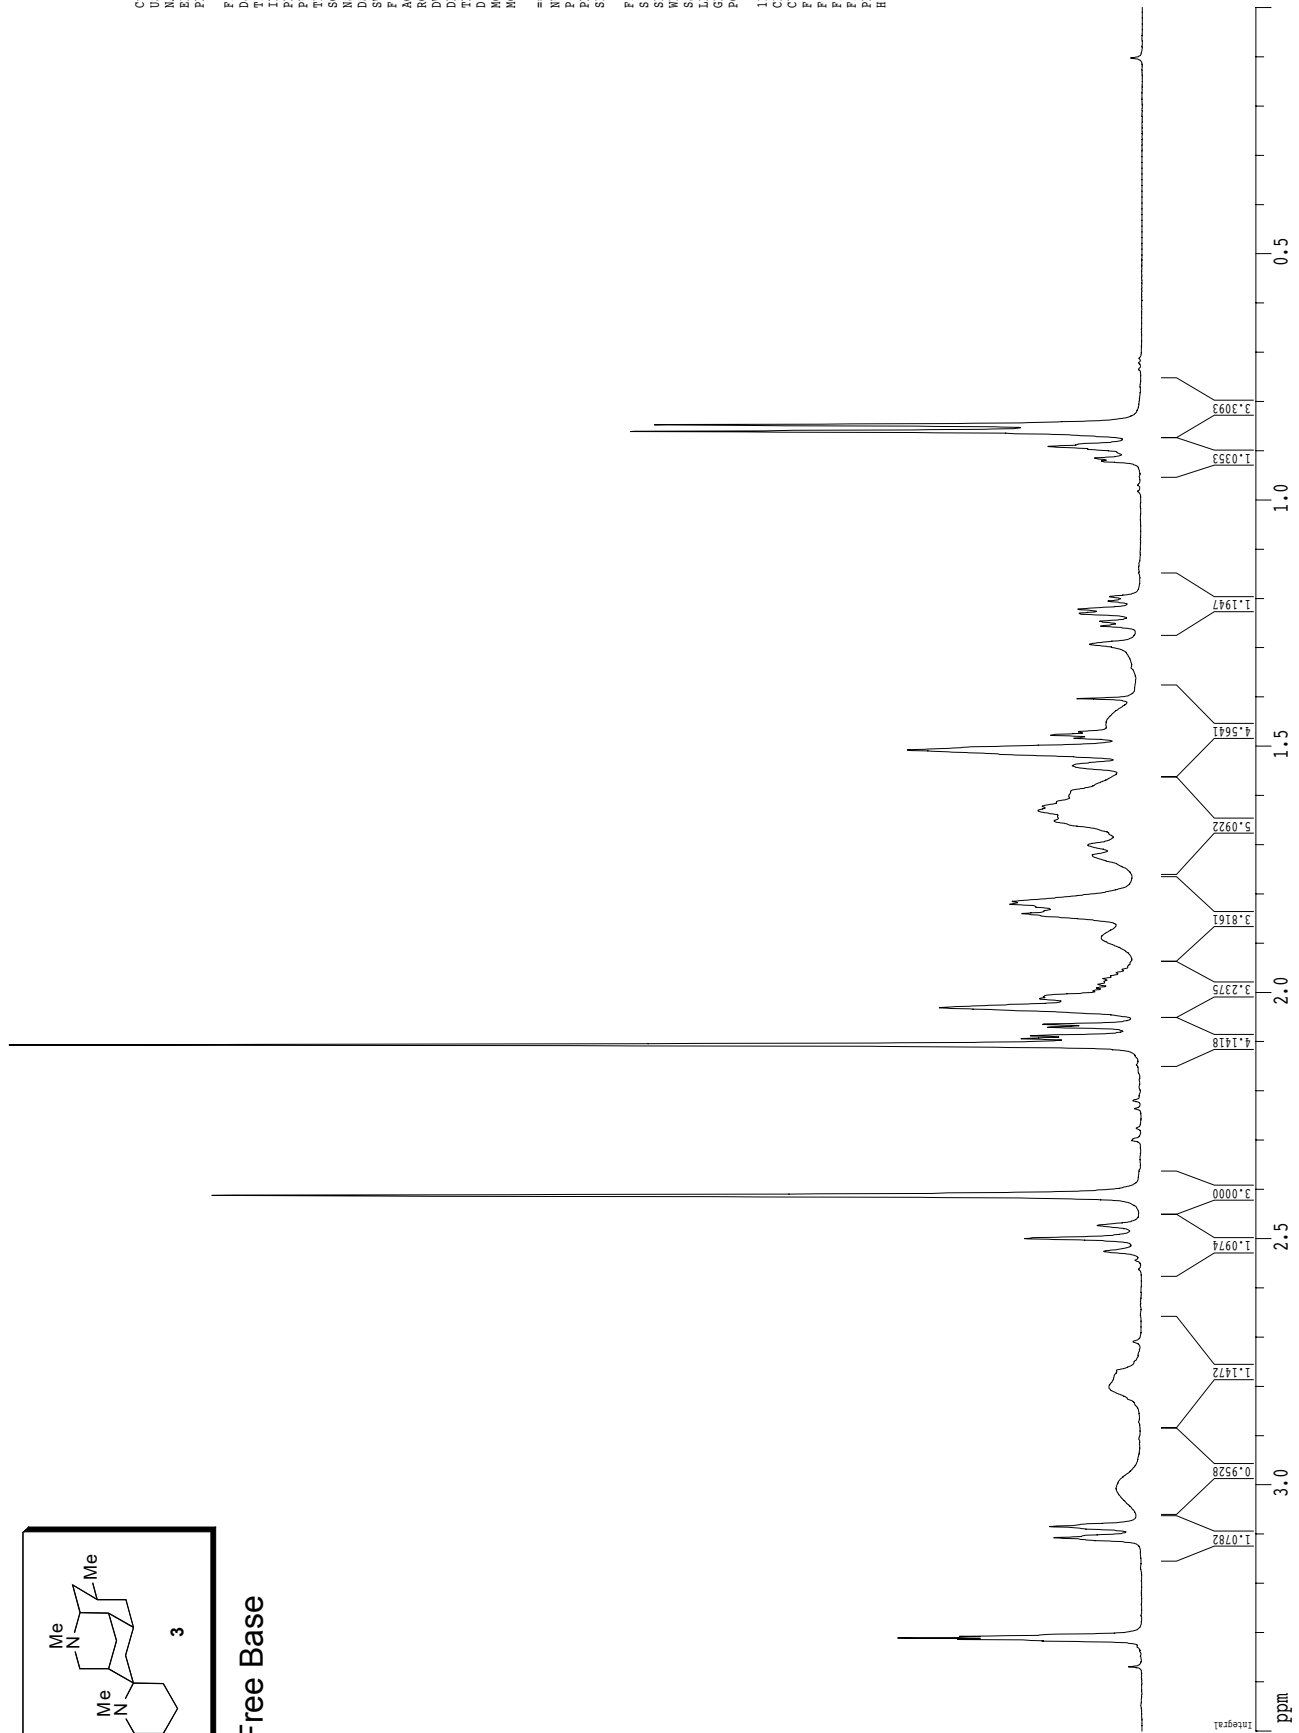

Free Base

## 13C spectrum with 1H decoupling

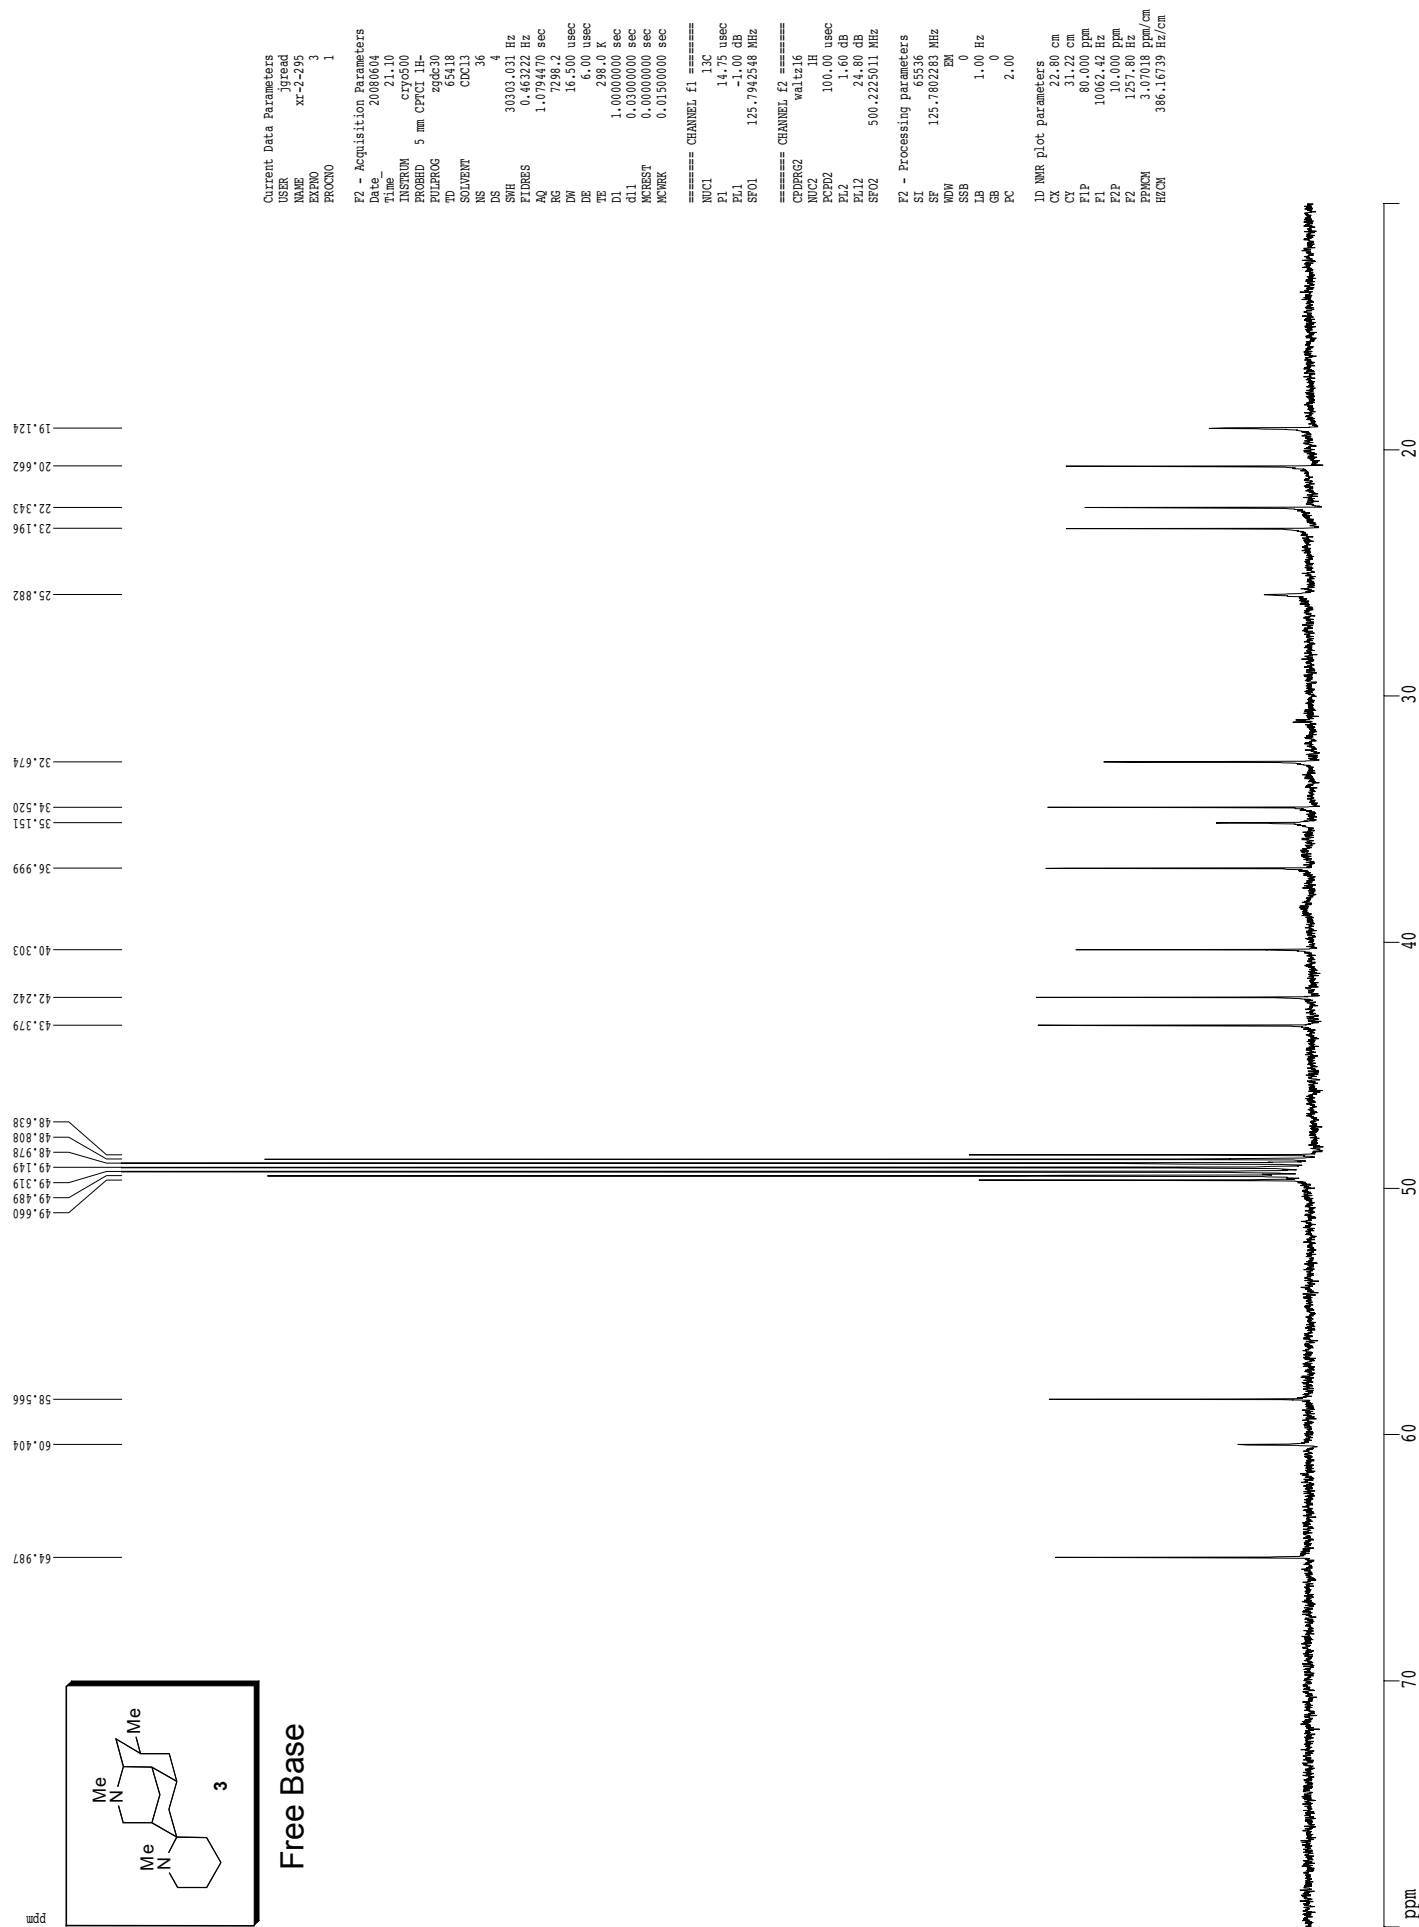

Supplement: NIHMS253776-supplement-SI_Pt_1.pdf [file NIHMS253776-supplement-SI_Pt_1.pdf]
